# Supplementary material
Source: publisher figshare collection journal article supplement (https://geolsoc.figshare.com/articles/dataset/_/3452948)
Supplement: Supplementary file 1 [file 1]

Table 1. All samples discussed in this study

| Sample | Formation | Age         | ID         | Lithologica | Latitude | Longitude | Light Mine | HM |
|--------|-----------|-------------|------------|-------------|----------|-----------|------------|----|
| 1C     | Bayah     | L. Eocene   | JBC2WAL11  | Medium-gr   | -6.90611 | 106.8291  | -          | Y  |
| 2C     | Bayah     | L. Eocene   | JBC2WAL11  | Medium to   | -6.90327 | 106.7971  | Y          | Y  |
| 3C     | Bayah     | L. Eocene   | JBC2WAL11  | Medium-gr   | -6.91444 | 106.7906  | Y          | -  |
| 4B     | Bayah     | L. Eocene   | JBC2BAY18  | Fine to me  | -6.95453 | 106.2401  | Y          | Y  |
| 5B     | Bayah     | L. Eocene   | JBC2BAY20  | Medium-gr   | -6.85105 | 106.1009  | -          | Y  |
| 6B     | Bayah     | L. Eocene   | JBC3BAY18  | Medium to   | -6.87753 | 106.185   | Y          | Y  |
| 7B     | Bayah     | L. Eocene   | JBC3BAY18  | Medium-gr   | -6.79568 | 106.2122  | Y          | -  |
| 8A     | Ciomas    | M. Eocene   | JBC2CIE25  | medium to   | -7.18657 | 106.4043  | Y          | Y  |
| 9A     | Ciomas    | M. Eocene   | JBC2CIE26  | Medium-gr   | -7.24166 | 106.3873  | Y          | Y  |
| 9A     | Ciomas    | M. Eocene   | JBC2CIE26  | Medium gr   | -7.24166 | 106.3873  | Y          | Y  |
| 11A    | Ciomas    | M. Eocene   | JBC2CIE27  | Quartz-rich | -7.24894 | 106.3805  | Y          | -  |
| 12A    | Ciomas    | M. Eocene   | JBC3CIE13  | Well bedde  | -7.23513 | 106.3865  | -          | Y  |
| 13B    | Cijengkol | E. Oligocen | JBC2CIJ191 | Medium-gr   | -6.86703 | 106.113   | Y          | Y  |
| 14B    | Cijengkol | E. Oligocen | JBC2CIJ203 | Quartz-rich | -6.85105 | 106.1009  | Y          | -  |
| 15B    | Cijengkol | E. Oligocen | JBC2CIJ210 | Fine-graine | -6.87337 | 106.2143  | Y          | -  |
| 16B    | Cijengkol | E. Oligocen | JBC2CIJ212 | Massive qu  | -6.87458 | 106.2145  | Y          | -  |
| 17B    | Cijengkol | E. Oligocen | JBC2CIJ216 | Quartz-rich | -6.87646 | 106.2147  | Y          | Y  |
| 19D    | Cikalong  | E. Oligocen | JBC2CIK09  | Fine quartz | -6.84555 | 107.4225  | Y          | Y  |
| 20D    | Cikalong  | E. Oligocen | JBC2CIK09  | Fine quartz | -6.84581 | 107.4226  | Y          | -  |
| 21D    | Cikalong  | E. Oligocen | JBC2CIK10  | Coarse qua  | -6.84465 | 107.4219  | Y          | -  |
| 22D    | Cikalong  | E. Oligocen | JBC2CIK11  | Poorly sort | -6.86004 | 107.3726  | -          | Y  |
| 23C    | Cikalong  | E. Oligocen | JBC2CIK17  | Medium-gr   | -7.02209 | 106.6757  | Y          | Y  |
| 24C    | Cikalong  | E. Oligocen | JBC2CIK18  | Fine-graine | -7.02564 | 106.6844  | Y          | -  |
| 25C    | Cikalong  | E. Oligocen | JBC2CIK18  | Fine-graine | -7.02806 | 106.691   | Y          | -  |
| 26D    | Cikalong  | E. Oligocen | JBC3CIK2   | Medium-gr   | -6.84452 | 107.422   | -          | Y  |
| 27A    | Ciletuh   | M. Eocene   | JBC2CIL26  | Fine-graine | -7.24168 | 106.3838  | Y          | -  |
| 28A    | Ciletuh   | M. Eocene   | JBC2CIL27  | Fine-graine | -7.24284 | 106.3884  | Y          | -  |
| 29A    | Ciletuh   | M. Eocene   | JBC3CIL13  | Fine-graine | -7.23041 | 106.3888  | Y          | -  |
| 30A    | Ciletuh   | M. Eocene   | JBC3CIL14  | Medium-gr   | -7.1852  | 106.4353  | -          | -  |
| 31A    | Ciletuh   | M. Eocene   | JBC3CIL14  | Fine-graine | -7.18153 | 106.4468  | Y          | -  |

## Zircon U-Pb

-  
Y  
-  
Y  
-  
-  
-  
Y  
-  
-  
-  
-  
Y  
-  
-  
-  
-  
-  
-  
-  
Y  
-  
-  
-  
-  
-  
Y  
-  
Y  
-
