# Supplementary material
Source: publisher figshare collection journal article supplement (https://geolsoc.figshare.com/articles/dataset/_/3452948)
Supplement: Supplementary file 3 [file 1]

# Zircon U-Pb data - Clements & Hall 2011

Note to readers: No common Pb correction has been applied to U-Pb data presented of samples JBC2CIE259 and JBC2BAY187 as this had not yet been improved. (radiogenic) concentrations are not available for these two samples.

Table 2

Zircon data from sample 28A (JBC2CIL272) (Ciletuh Formation)

GLITTER!: Isotope ratios.

| Excluded | d | Analysis_# | Pb207/Pb2 | Pb206/U23 | Pb207/U23 | Pb208/Th2 | Pb208/Pb2 | Th232/U23 | U238/Si29 |
|----------|---|------------|-----------|-----------|-----------|-----------|-----------|-----------|-----------|
| Y        |   | 2279-1     | 0.08332   | 0.18858   | 2.11785   | 0.06314   | 0.48249   | 1.28192   | 0.01479   |
|          |   | 2279-2     | 0.06254   | 0.10318   | 0.87687   | 0.03336   | 0.07332   | 0.2017    | 0.04659   |
|          |   | 2279-3     | 0.11348   | 0.33763   | 5.21081   | 0.10344   | 0.16074   | 0.46669   | 0.05742   |
|          |   | 2279-4     | 0.05472   | 0.05216   | 0.4016    | 0.01666   | 0.19974   | 0.55604   | 0.09454   |
|          |   | 2279-5     | 0.08885   | 0.22278   | 2.7058    | 0.06524   | 0.2593    | 0.78752   | 0.02051   |
|          |   | 2279-6     | 0.07251   | 0.15354   | 1.52284   | 0.04608   | 0.11476   | 0.34006   | 0.05138   |
| Y        |   | 2279-7     | 0.79242   | 0.05989   | 6.82      | 0.10583   | 1.78455   | 0.89823   | 0.00567   |
| Y        |   | 2279-8     | 0.75613   | 0.06367   | 6.28891   | 0.03362   | 1.80173   | 3.03434   | 0.00285   |
|          |   | 2279-9     | 0.05962   | 0.01358   | 0.11037   | 0.00487   | 0.22027   | 0.54602   | 0.03529   |
|          |   | 2279-10    | 0.06846   | 0.12946   | 1.1966    | 0.04042   | 0.16133   | 0.45952   | 0.04234   |
|          |   | 2279-11    | 0.0538    | 0.01398   | 0.1042    | 0.00459   | 0.26794   | 0.72524   | 0.02302   |
|          |   | 2279-12    | 0.04874   | 0.01397   | 0.0935    | 0.00494   | 0.10014   | 0.25206   | 0.16035   |
|          |   | 2279-13    | 0.0635    | 0.10599   | 0.93962   | 0.03363   | 0.07266   | 0.20364   | 0.0844    |
|          |   | 2279-14    | 0.10583   | 0.31428   | 4.54043   | 0.09455   | 0.14378   | 0.42497   | 0.05102   |
|          |   | 2279-15    | 0.05073   | 0.00934   | 0.06408   | 0.0032    | 0.27347   | 0.70992   | 0.03054   |
|          |   | 2279-16    | 0.05912   | 0.0089    | 0.07407   | 0.00372   | 0.22651   | 0.48225   | 0.06878   |
|          |   | 2279-17    | 0.05903   | 0.08966   | 0.73581   | 0.02978   | 0.05713   | 0.15294   | 0.09492   |
|          |   | 2279-18    | 0.07263   | 0.16307   | 1.60822   | 0.05139   | 0.1504    | 0.42438   | 0.02583   |
|          |   | 2279-19    | 0.07804   | 0.19303   | 2.09045   | 0.0617    | 0.22838   | 0.63526   | 0.04556   |
|          |   | 2279-20    | 0.05269   | 0.01356   | 0.09787   | 0.00459   | 0.21193   | 0.55653   | 0.02489   |
|          |   | 2279-21    | 0.0531    | 0.01361   | 0.09856   | 0.00475   | 0.17263   | 0.43985   | 0.04936   |
| Y        |   | 2279-22    | 0.75961   | 0.06698   | 7.03713   | 0.26231   | 1.72933   | 0.39252   | 0.00671   |
| Y        |   | 2279-23    | 0.06207   | 0.0221    | 0.19031   | 0.0078    | 0.2835    | 0.71346   | 0.04266   |
|          |   | 2279-24    | 0.05107   | 0.01394   | 0.09794   | 0.0049    | 0.15978   | 0.40392   | 0.12679   |
| Y        |   | 2279-25    | 0.21839   | 0.01725   | 0.50709   | 0.01167   | 0.68868   | 0.90493   | 0.02064   |
|          |   | 2279-26    | 0.08834   | 0.23894   | 2.89899   | 0.0753    | 0.07674   | 0.21643   | 0.04402   |
|          |   | 2279-27    | 0.06015   | 0.09455   | 0.77468   | 0.03089   | 0.12691   | 0.34524   | 0.04461   |
|          |   | 2279-28    | 0.06057   | 0.09672   | 0.80369   | 0.03102   | 0.4231    | 1.17255   | 0.026     |
|          |   | 2279-29    | 0.05679   | 0.01429   | 0.1165    | 0.00493   | 0.23584   | 0.60817   | 0.11181   |
|          |   | 2279-30    | 0.0785    | 0.20183   | 2.13754   | 0.05972   | 0.21787   | 0.65446   | 0.04525   |
|          |   | 2279-31    | 0.11149   | 0.26998   | 4.17808   | 0.08992   | 0.20591   | 0.54953   | 0.08098   |
|          |   | 2279-32    | 0.05768   | 0.07769   | 0.60957   | 0.02641   | 0.10235   | 0.2676    | 0.03839   |
|          |   | 2279-33    | 0.07856   | 0.20128   | 2.14785   | 0.06415   | 0.11863   | 0.33084   | 0.03436   |
|          |   | 2279-34    | 0.05942   | 0.08731   | 0.70625   | 0.02833   | 0.42597   | 1.16693   | 0.03025   |
|          |   | 2279-35    | 0.05386   | 0.04581   | 0.33351   | 0.01536   | 0.25597   | 0.67838   | 0.03423   |
| Y        |   | 2279-36    | 0.17267   | 0.3103    | 7.46164   | 0.1009    | 0.14505   | 0.39644   | 0.16727   |
|          |   | 2279-37    | 0.06509   | 0.09957   | 0.89154   | 0.03518   | 0.20928   | 0.52647   | 0.01607   |
| Y        |   | 2279-38    | 0.79264   | 0.1393    | 14.74545  | 0.06158   | 1.86861   | 3.75701   | 0.00466   |
|          |   | 2279-39    | 0.06089   | 0.0961    | 0.7923    | 0.03119   | 0.22491   | 0.61589   | 0.03242   |

|   |         |          |          |          |         |         |         |          |
|---|---------|----------|----------|----------|---------|---------|---------|----------|
|   | 2279-40 | 0.05843  | 0.01059  | 0.08512  | 0.0037  | 0.39478 | 1.00561 | 0.04263  |
|   | 2279-41 | 0.07487  | 0.18402  | 1.90151  | 0.05843 | 0.10174 | 0.28478 | 0.08981  |
|   | 2279-42 | 0.0799   | 0.20658  | 2.2544   | 0.06339 | 0.33085 | 0.95818 | 0.01038  |
|   | 2279-43 | 0.07389  | 0.17274  | 1.75198  | 0.05083 | 0.1334  | 0.40287 | 0.10665  |
|   | 2279-44 | 0.05958  | 0.09479  | 0.7694   | 0.03027 | 0.13646 | 0.37977 | 0.01928  |
|   | 2279-45 | 0.04919  | 0.01352  | 0.09122  | 0.00443 | 0.26451 | 0.71741 | 0.13379  |
| Y | 2279-46 | -0.00457 | 65.03783 | -1.71817 | Inf     | 0.29171 | 0       | 0        |
| Y | 2279-47 | 0.06074  | 0.16091  | 1.34393  | 0.05115 | 0.11331 | 0.31517 | -0.00325 |
|   | 2279-48 | 0.1539   | 0.45814  | 9.56951  | 0.13242 | 0.17591 | 0.53809 | 0.02261  |
|   | 2279-49 | 0.06111  | 0.10514  | 0.87176  | 0.03648 | 0.18816 | 0.47948 | 0.04582  |
|   | 2279-50 | 0.05765  | 0.01071  | 0.08279  | 0.00404 | 0.25981 | 0.60923 | 0.03256  |
|   | 2279-51 | 0.06338  | 0.08821  | 0.75725  | 0.03172 | 0.16004 | 0.39345 | 0.01844  |
|   | 2279-52 | 0.05439  | 0.05924  | 0.44243  | 0.02111 | 0.1616  | 0.40101 | 0.01771  |
| Y | 2279-53 | 0.09419  | 0.01485  | 0.19353  | 0.00799 | 0.24189 | 0.39749 | 0.01957  |
|   | 2279-54 | 0.05863  | 0.08896  | 0.70354  | 0.03048 | 0.10679 | 0.27551 | 0.06286  |
| Y | 2279-55 | 0.20732  | 0.05029  | 1.36867  | 0.06051 | 0.44084 | 0.32386 | 0.00703  |
| Y | 2279-56 | 0.72813  | 0.04545  | 4.2696   | 0.30177 | 1.55492 | 0.20702 | 0.00863  |
|   | 2279-57 | 0.06149  | 0.10901  | 0.8966   | 0.03722 | 0.10725 | 0.27767 | 0.02506  |
|   | 2279-58 | 0.05214  | 0.01401  | 0.0987   | 0.0051  | 0.20389 | 0.49501 | 0.03451  |
|   | 2279-59 | 0.0546   | 0.01525  | 0.11103  | 0.00511 | 0.19898 | 0.52446 | 0.0316   |
| Y | 2279-60 | 0.12088  | 0.02486  | 0.40231  | 0.0127  | 0.3724  | 0.6442  | 0.01117  |
|   | 2279-61 | 0.05896  | 0.01716  | 0.13702  | 0.0065  | 0.20842 | 0.486   | 0.07264  |
|   | 2279-62 | 0.0544   | 0.05164  | 0.38633  | 0.01842 | 0.2068  | 0.51236 | 0.11782  |
|   | 2279-63 | 0.05622  | 0.01469  | 0.11471  | 0.00519 | 0.22217 | 0.55529 | 0.02915  |
|   | 2279-64 | 0.07854  | 0.18095  | 1.97975  | 0.05598 | 0.41679 | 1.19074 | 0.00694  |
|   | 2279-65 | 0.0762   | 0.15518  | 1.58443  | 0.05364 | 0.0931  | 0.23803 | 0.01482  |
|   | 2279-66 | 0.05374  | 0.04     | 0.29491  | 0.01439 | 0.14407 | 0.35386 | 0.0771   |
|   | 2279-67 | 0.12296  | 0.34565  | 5.81049  | 0.1126  | 0.13783 | 0.37393 | 0.03813  |
|   | 2279-68 | 0.05173  | 0.01356  | 0.09754  | 0.00501 | 0.17324 | 0.41457 | 0.07759  |
|   | 2279-69 | 0.07621  | 0.20299  | 2.02745  | 0.06526 | 0.16973 | 0.46656 | 0.01726  |
|   | 2279-70 | 0.05882  | 0.08768  | 0.71233  | 0.03254 | 0.02592 | 0.06172 | 0.18287  |
|   | 2279-71 | 0.05634  | 0.0136   | 0.10539  | 0.00488 | 0.30924 | 0.76123 | 0.11312  |
|   | 2279-72 | 0.05789  | 0.08009  | 0.64932  | 0.02763 | 0.09275 | 0.23764 | 0.06423  |
|   | 2279-73 | 0.07204  | 0.16441  | 1.64861  | 0.05568 | 0.06805 | 0.17758 | 0.19214  |
| Y | 2279-74 | 0.11421  | 0.01663  | 0.2551   | 0.0097  | 0.32288 | 0.48925 | 0.07292  |
| Y | 2279-75 | 0.73961  | 0.19099  | 20.62573 | 0.82828 | 1.57759 | 0.32146 | 0.00312  |
|   | 2279-76 | 0.05421  | 0.04399  | 0.32576  | 0.01686 | 0.05777 | 0.13317 | 0.13378  |
|   | 2279-77 | 0.05717  | 0.03507  | 0.27244  | 0.01258 | 0.22334 | 0.55006 | 0.02558  |
|   | 2279-78 | 0.05585  | 0.01506  | 0.11543  | 0.00527 | 0.282   | 0.71208 | 0.02653  |
|   | 2279-79 | 0.06133  | 0.0109   | 0.08864  | 0.00435 | 0.16    | 0.35426 | 0.04135  |

Table 3

Zircon data from sample 30A (JBC3CIL145) (Ciletuh Formation)

GLITTER!: Isotope ratios.

|   | Analysis_# | Pb207/Pb2 | Pb206/U23 | Pb207/U23 | Pb208/Th2 | Pb208/Pb2 | Th232/U23 | U238/Si29 |
|---|------------|-----------|-----------|-----------|-----------|-----------|-----------|-----------|
| Y | 3145CIL1   | 0.78489   | 2.18025   | 110.9253  | 1.45815   | 1.17949   | 1.55686   | 0.00014   |
| Y | 3145CIL2   | 0.05247   | 0.05629   | 0.27106   | 0.0104    | 0.07089   | 0.33848   | 0.00601   |
| Y | 3145CIL3   | 0.04873   | 0.02492   | 0.1142    | 0.00414   | 0.1133    | 0.60154   | 0.02569   |

|   |          |         |         |          |         |         |         |         |
|---|----------|---------|---------|----------|---------|---------|---------|---------|
| Y | 3145CIL4 | 0.10353 | 0.47516 | 4.63893  | 0.07049 | 0.15663 | 0.93115 | 0.02222 |
| Y | 3145CIL5 | 0.04695 | 0.04287 | 0.23298  | 0.00859 | 0.13994 | 0.61593 | 0.05718 |
| Y | 3145CIL6 | 0.04753 | 0.0164  | 0.07375  | 0.00296 | 0.1739  | 0.85072 | 0.01444 |
| Y | 3145CIL7 | 0.04673 | 0.00847 | 0.04775  | 0.00185 | 0.13824 | 0.55772 | 0.05312 |
| Y | 3145CIL8 | 0.13141 | 0.71759 | 13.2358  | 0.04323 | 0.00465 | 0.06812 | 0.21284 |
|   | 3145CIL9 | 0.05274 | 0.08063 | 0.58504  | 0.02033 | 0.23391 | 0.81822 | 0.07647 |
|   | 145CIL10 | 0.04836 | 0.03306 | 0.21026  | 0.00811 | 0.03534 | 0.12709 | 0.06583 |
|   | 145CIL11 | 0.05498 | 0.09357 | 0.70009  | 0.02269 | 0.06825 | 0.24837 | 0.07114 |
|   | 145CIL12 | 0.04657 | 0.00709 | 0.04612  | 0.00158 | 0.14623 | 0.58107 | 0.19569 |
|   | 145CIL14 | 0.05118 | 0.00627 | 0.04376  | 0.00103 | 0.44255 | 2.39134 | 0.24293 |
| Y | 145CIL15 | 0.04842 | 0.01545 | 0.07086  | 0.00282 | 0.2426  | 1.17423 | 0.0297  |
| Y | 145CIL16 | 0.05542 | 0.01187 | 0.0609   | 0.00206 | 0.11743 | 0.59908 | 0.01777 |
|   | 145CIL17 | 0.06803 | 0.01098 | 0.0707   | 0.00224 | 0.16238 | 0.70618 | 0.02381 |
|   | 145CIL18 | 0.05036 | 0.00776 | 0.05133  | 0.0019  | 0.22299 | 0.80664 | 0.0731  |
| Y | 145CIL19 | 0.05022 | 0.05085 | 0.23849  | 0.00877 | 0.18978 | 0.975   | 0.01995 |
| Y | 145CIL20 | 0.08836 | 0.26458 | 2.43581  | 0.04922 | 0.33734 | 1.60831 | 0.00273 |
| Y | 145CIL21 | 0.06351 | 0.11821 | 0.76977  | 0.02715 | 0.08774 | 0.3397  | 0.04264 |
| Y | 145CIL22 | 0.0566  | 0.00814 | 0.06006  | 0.00239 | 0.15842 | 0.48029 | 0.07245 |
|   | 145CIL23 | 0.06552 | 0.00936 | 0.05673  | 0.00211 | 0.16853 | 0.66582 | 0.02149 |
|   | 145CIL24 | 0.06385 | 0.01027 | 0.06245  | 0.00218 | 0.15352 | 0.64627 | 0.02416 |
|   | 145CIL25 | 0.06351 | 0.00886 | 0.0539   | 0.00203 | 0.14391 | 0.56114 | 0.02424 |
| Y | 145CIL26 | 0.04755 | 0.01906 | 0.08444  | 0.00346 | 0.15833 | 0.77844 | 0.03537 |
|   | 145CIL27 | 0.07572 | 0.01153 | 0.07819  | 0.00278 | 0.17128 | 0.63555 | 0.01719 |
| Y | 145CIL28 | 0.09059 | 0.3272  | 3.04335  | 0.06692 | 0.18918 | 0.82825 | 0.03594 |
| Y | 145CIL29 | 0.04611 | 0.02445 | 0.10463  | 0.00455 | 0.14398 | 0.69332 | 0.03704 |
|   | 145CIL30 | 0.0501  | 0.03855 | 0.25245  | 0.00986 | 0.16673 | 0.58495 | 0.06683 |
| Y | 145CIL31 | 0.15204 | 0.27227 | 3.80138  | 0.05647 | 0.07644 | 0.33105 | 0.03292 |
| Y | 145CIL32 | 0.06544 | 0.05709 | 0.36242  | 0.0129  | 0.1502  | 0.59795 | 0.00663 |
| Y | 145CIL33 | 0.05225 | 0.05669 | 0.26879  | 0.01057 | 0.13722 | 0.66226 | 0.0106  |
| Y | 145CIL34 | 0.05752 | 0.0297  | 0.23385  | 0.03282 | 0.04137 | 0.03373 | 0.13032 |
|   | 145CIL35 | 0.07462 | 0.01019 | 0.07265  | 0.00236 | 0.16759 | 0.65289 | 0.01194 |
|   | 145CIL36 | 0.07213 | 0.04375 | 0.32737  | 0.01409 | 0.09369 | 0.26266 | 0.03771 |
|   | 145CIL37 | 0.05009 | 0.03211 | 0.22475  | 0.00672 | 0.17202 | 0.74259 | 0.20464 |
| Y | 145CIL38 | 0.05544 | 0.11744 | 0.61267  | 0.02165 | 0.16955 | 0.83197 | 0.04021 |
|   | 145CIL39 | 0.06456 | 0.00872 | 0.05459  | 0.00186 | 0.11151 | 0.47391 | 0.01489 |
|   | 145CIL40 | 0.16536 | 0.67227 | 10.31989 | 0.07014 | 0.13007 | 1.1295  | 0.02604 |
|   | 145CIL41 | 0.05223 | 0.00962 | 0.06969  | 0.00301 | 0.16197 | 0.46932 | 0.10422 |
|   | 145CIL42 | 0.05984 | 0.03033 | 0.22756  | 0.01051 | 0.07697 | 0.20193 | 0.06188 |
|   | 145CIL43 | 0.07105 | 0.00941 | 0.0609   | 0.0022  | 0.21687 | 0.84374 | 0.01534 |
|   | 145CIL44 | 0.06332 | 0.00949 | 0.05588  | 0.00207 | 0.15443 | 0.64263 | 0.02438 |
| Y | 145CIL45 | 0.05169 | 0.05636 | 0.27958  | 0.0108  | 0.18722 | 0.88922 | 0.02355 |
|   | 145CIL46 | 0.05592 | 0.07292 | 0.53649  | 0.01951 | 0.17616 | 0.59973 | 0.06798 |
| Y | 145CIL47 | 0.05489 | 0.05601 | 0.28621  | 0.0112  | 0.14992 | 0.68307 | 0.01194 |
|   | 145CIL48 | 0.06919 | 0.00919 | 0.05992  | 0.00228 | 0.21026 | 0.77132 | 0.02185 |
|   | 145CIL49 | 0.05314 | 0.04304 | 0.28825  | 0.00882 | 0.24636 | 1.09614 | 0.06485 |
|   | 145CIL50 | 0.07786 | 0.18324 | 1.89831  | 0.05339 | 0.18071 | 0.56557 | 0.0714  |
|   | 145CIL51 | 0.05843 | 0.01084 | 0.0652   | 0.00249 | 0.24403 | 0.97049 | 0.04168 |
|   | 145CIL52 | 0.06873 | 0.02607 | 0.17083  | 0.00639 | 0.16972 | 0.6314  | 0.02321 |
|   | 145CIL53 | 0.06756 | 0.01147 | 0.0708   | 0.00274 | 0.14497 | 0.55379 | 0.01598 |
|   | 145CIL54 | 0.05061 | 0.03348 | 0.23135  | 0.01009 | 0.06305 | 0.19079 | 0.08739 |
| Y | 145CIL55 | 0.0585  | 0.05801 | 0.34074  | 0.01408 | 0.07761 | 0.29153 | 0.00714 |

|   |          |         |         |          |         |         |         |         |
|---|----------|---------|---------|----------|---------|---------|---------|---------|
|   | 145CIL56 | 0.04954 | 0.00781 | 0.05445  | 0.00245 | 0.14445 | 0.42022 | 0.10577 |
|   | 145CIL57 | 0.05224 | 0.00857 | 0.04851  | 0.00208 | 0.12713 | 0.47864 | 0.04787 |
|   | 145CIL58 | 0.07373 | 0.01051 | 0.07391  | 0.00353 | 0.21064 | 0.57165 | 0.01285 |
| Y | 145CIL59 | 0.11148 | 0.20031 | 3.07658  | 0.07575 | 0.12272 | 0.29556 | 0.07926 |
| Y | 145CIL60 | 0.05665 | 0.06095 | 0.31866  | 0.01257 | 0.12412 | 0.54787 | 0.01322 |
|   | 145CIL61 | 0.09778 | 0.27754 | 3.78137  | 0.07682 | 0.11783 | 0.38736 | 0.1348  |
| Y | 145CIL62 | 0.05519 | 0.05164 | 0.27116  | 0.01084 | 0.16334 | 0.70795 | 0.01544 |
|   | 145CIL63 | 0.06289 | 0.0455  | 0.32849  | 0.01106 | 0.14694 | 0.54918 | 0.04113 |
|   | 145CIL64 | 0.06235 | 0.01272 | 0.07716  | 0.00292 | 0.19583 | 0.77536 | 0.02019 |
| Y | 145CIL65 | 0.05801 | 0.12989 | 0.69831  | 0.02495 | 0.09682 | 0.45722 | 0.00919 |
| Y | 145CIL66 | 0.86576 | 5.70346 | 540.9624 | 4.25498 | 1.39311 | 1.69256 | 0.00006 |
| Y | 145CIL67 | 0.07572 | 0.23749 | 1.72363  | 0.01715 | 0.07613 | 0.95454 | 0.03602 |

Table 4

Zircon data from sample 8A (JBC2CIE259) (Ciemas Formation)

GLITTER!: Isotope ratios.

|   | Analysis_# | Pb207/Pb2 | Pb206/U23 | Pb207/U23 | Pb208/Th2 | Pb208/Pb206 |
|---|------------|-----------|-----------|-----------|-----------|-------------|
|   | CIL1       | 0.07148   | 0.14373   | 1.41476   | 0.05561   | 0.24863     |
|   | CIL2       | 0.06489   | 0.12846   | 1.14779   | 0.04366   | 0.02752     |
|   | CIL3       | 0.32954   | 0.69665   | 31.60807  | 0.20627   | 0.126       |
|   | CIL4       | 0.09451   | 0.19015   | 2.47399   | 0.07397   | 0.1488      |
| Y | CIL5       | 0.07574   | 0.03847   | 0.40106   | 0.0385    | 0.07572     |
|   | CIL6       | 0.11141   | 0.32342   | 4.95968   | 0.10534   | 0.43686     |
| Y | CIL7       | 0.20481   | 0.00297   | 0.08385   | 0.00105   | 0.21391     |
|   | CIL8       | 0.05492   | 0.03742   | 0.28282   | 0.01539   | 0.08762     |
| Y | CIL9       | 0.07299   | 0.00278   | 0.02793   | 0.00123   | 0.25771     |
|   | CIL10      | 0.05708   | 0.08714   | 0.68449   | 0.03054   | 0.32055     |
|   | CIL11      | 0.07073   | 0.12308   | 1.19795   | 0.05684   | 0.07237     |
| Y | CIL12      | 0.10424   | 0.00239   | 0.03433   | 0.0013    | 0.30751     |
| Y | CIL13      | 0.0711    | 0.05651   | 0.55281   | 0.02277   | 0.21166     |
|   | CIL14      | 0.16667   | 0.39999   | 9.17129   | 0.11948   | 0.1954      |
|   | CIL15      | 0.17328   | 0.4458    | 10.62688  | 0.13519   | 0.13088     |
|   | CIL16      | 0.0542    | 0.0333    | 0.24825   | 0.01124   | 0.05329     |
|   | CIL17      | 0.06114   | 0.0907    | 0.76284   | 0.03267   | 0.10802     |
|   | CIL18      | 0.18675   | 0.48353   | 12.42089  | 0.14362   | 0.14469     |
|   | CIL19      | 0.08497   | 0.19637   | 2.2951    | 0.05815   | 0.24562     |
|   | CIL20      | 0.05911   | 0.08224   | 0.66863   | 0.02965   | 0.08176     |
|   | CIL21      | 0.05151   | 0.03487   | 0.24707   | 0.0127    | 0.07372     |
|   | CIL22      | 0.06501   | 0.11304   | 1.01069   | 0.03836   | 0.20838     |
|   | CIL23      | 0.05756   | 0.03964   | 0.31385   | 0.01328   | 0.16461     |
|   | CIL24      | 0.05046   | 0.03325   | 0.23075   | 0.01173   | 0.13968     |
|   | CIL25      | 0.07928   | 0.17345   | 1.89105   | 0.05406   | 0.22008     |
| Y | CIL26      | 0.12925   | 0.12118   | 2.15415   | 0.08162   | 0.05639     |
| Y | CIL27      | 0.17539   | 0.32173   | 7.7606    | 0.07646   | 0.05415     |
|   | CIL28      | 0.11608   | 0.32441   | 5.17923   | 0.09465   | 0.08909     |
| Y | CIL29      | 0.20188   | 0.00595   | 0.16526   | 0.00457   | 0.38294     |
|   | CIL30      | 0.15705   | 0.42497   | 9.17885   | 0.11554   | 0.1284      |
|   | CIL31      | 0.06372   | 0.09361   | 0.82035   | 0.029     | 0.28777     |

|   |       |         |         |         |         |         |
|---|-------|---------|---------|---------|---------|---------|
| Y | CIL32 | 0.08443 | 0.19454 | 2.2591  | 0.05912 | 0.36908 |
|   | CIL33 | 0.17326 | 0.31291 | 7.45669 | 0.08059 | 0.04326 |
|   | CIL34 | 0.09508 | 0.19546 | 2.55627 | 0.06092 | 0.44225 |
|   | CIL35 | 0.0981  | 0.24503 | 3.30639 | 0.05362 | 0.04308 |
|   | CIL36 | 0.07346 | 0.16739 | 1.69153 | 0.04823 | 0.07311 |
| Y | CIL37 | 0.07549 | 0.15324 | 1.59144 | 0.03307 | 0.02101 |
|   | CIL38 | 0.07807 | 0.20078 | 2.15645 | 0.05648 | 0.25876 |
|   | CIL39 | 0.06524 | 0.10106 | 0.9072  | 0.02925 | 0.19353 |
|   | CIL40 | 0.08875 | 0.24571 | 3.00033 | 0.06991 | 0.09616 |
|   | CIL41 | 0.05861 | 0.06649 | 0.53628 | 0.02683 | 0.10827 |
| Y | CIL42 | 0.09239 | 0.22386 | 2.84622 | 0.07156 | 0.15292 |
|   | CIL43 | 0.06627 | 0.10819 | 0.98669 | 0.0404  | 0.05897 |
|   | CIL44 | 0.05532 | 0.03735 | 0.28437 | 0.01208 | 0.18066 |
|   | CIL45 | 0.07274 | 0.1911  | 1.91333 | 0.05542 | 0.23833 |
|   | CIL46 | 0.15725 | 0.47351 | 10.2494 | 0.12448 | 0.15001 |
| Y | CIL47 | 0.04913 | 0.00981 | 0.06634 | 0.0103  | 0.10531 |
| Y | CIL48 | 0.05049 | 0.03624 | 0.25191 | 0.01027 | 0.23657 |
| Y | CIL49 | 0.08257 | 0.20515 | 2.33242 | 0.05941 | 0.12631 |
| Y | CIL50 | 0.09109 | 0.00188 | 0.02353 | 0.00086 | 0.27461 |
| Y | CIL51 | 0.04879 | 0.03747 | 0.25183 | 0.01123 | 0.12467 |
| Y | CIL52 | 0.06785 | 0.08948 | 0.83645 | 0.02786 | 0.59576 |
|   | CIL53 | 0.15329 | 0.35532 | 7.50436 | 0.09867 | 0.18282 |
|   | CIL54 | 0.10385 | 0.30801 | 4.40758 | 0.08472 | 0.17341 |
|   | CIL55 | 0.06195 | 0.03689 | 0.31497 | 0.01149 | 0.15445 |
|   | CIL56 | 0.0565  | 0.09146 | 0.71221 | 0.02594 | 0.13117 |
| Y | CIL57 | 0.04687 | 0.03034 | 0.19607 | 0.00892 | 0.11405 |
| Y | CIL58 | 0.06493 | 0.01134 | 0.10155 | 0.01395 | 0.14839 |
| Y | CIL59 | 0.06507 | 0.00246 | 0.02209 | 0.00064 | 0.21644 |
| Y | CIL60 | 0.1275  | 0.34587 | 6.08165 | 0.10237 | 0.14136 |
|   | CIL61 | 0.05838 | 0.0791  | 0.63529 | 0.047   | 0.31257 |
|   | CIL62 | 0.05726 | 0.0544  | 0.4286  | 0.01867 | 0.20447 |
|   | CIL63 | 0.05113 | 0.05047 | 0.35516 | 0.01555 | 0.12518 |
|   | CIL64 | 0.04901 | 0.03367 | 0.22713 | 0.00986 | 0.28511 |
| Y | CIL65 | 0.05693 | 0.08374 | 0.65636 | 0.02452 | 0.31421 |
|   | CIL66 | 0.1006  | 0.27996 | 3.87836 | 0.07819 | 0.18017 |
|   | CIL67 | 0.05249 | 0.00423 | 0.03055 | 0.00388 | 0.0529  |
|   | CIL68 | 0.10753 | 0.31758 | 4.70408 | 0.08762 | 0.14561 |
|   | CIL69 | 0.0592  | 0.07794 | 0.6357  | 0.02315 | 0.35955 |
| Y | CIL70 | 0.15381 | 0.37451 | 7.93737 | 0.08317 | 0.10319 |
|   | CIL71 | 0.06194 | 0.06799 | 0.58039 | 0.01929 | 0.15551 |
|   | CIL72 | 0.04955 | 0.03892 | 0.26583 | 0.01077 | 0.22226 |
|   | CIL73 | 0.05708 | 0.08939 | 0.70332 | 0.02518 | 0.06532 |
|   | CIL74 | 0.09153 | 0.24443 | 3.08506 | 0.06849 | 0.16221 |
| Y | CIL75 | 0.06797 | 0.13624 | 1.27712 | 0.04    | 0.08772 |
|   | CIL76 | 0.21369 | 0.02117 | 0.62405 | 0.01276 | 0.52531 |
|   | CIL77 | 0.0757  | 0.18912 | 1.97455 | 0.04718 | 0.24643 |
|   | CIL78 | 0.05906 | 0.11605 | 0.94547 | 0.02814 | 0.02253 |
|   | CIL79 | 0.13122 | 0.32135 | 5.81662 | 0.0817  | 0.06804 |
| Y | CIL80 | 0.05234 | 0.08755 | 0.63221 | 0.02371 | 0.02676 |
|   | CIL81 | 0.04573 | 0.00736 | 0.04645 | 0.0019  | 0.24329 |
|   | CIL82 | 0.0637  | 0.14518 | 1.27589 | 0.03713 | 0.02908 |

|   |       |         |         |         |         |         |
|---|-------|---------|---------|---------|---------|---------|
|   | CIL83 | 0.06817 | 0.15911 | 1.49635 | 0.03995 | 0.09627 |
|   | CIL84 | 0.06633 | 0.15084 | 1.38036 | 0.0409  | 0.0523  |
|   | CIL85 | 0.06385 | 0.1561  | 1.37512 | 0.03997 | 0.07968 |
|   | CIL86 | 0.05867 | 0.12966 | 1.04964 | 0.03291 | 0.07889 |
|   | CIL87 | 0.0583  | 0.11126 | 0.89497 | 0.0277  | 0.1554  |
| Y | CIL88 | 0.06283 | 0.19558 | 1.6955  | 0.0457  | 0.11466 |
|   | CIL89 | 0.05657 | 0.01556 | 0.12141 | 0.00491 | 0.20206 |
| Y | CIL90 | 0.05944 | 0.14487 | 1.18797 | 0.03509 | 0.10775 |

Table 5

Zircon data from sample 4B (JBC2BAY187) (Bayah Formation).

GLITTER!: Isotope ratios.

|   | Analysis_# | Pb207/Pb2 | Pb206/U23 | Pb207/U23 | Pb208/Th2 | Pb208/Pb206 |
|---|------------|-----------|-----------|-----------|-----------|-------------|
|   | BAY1       | 0.03751   | 0.01362   | 0.07049   | 0.00406   | 0.25425     |
| Y | BAY2       | 0.27593   | 0.01162   | 0.44231   | 0.00724   | 0.59321     |
| Y | BAY3       | 0.06286   | 0.1589    | 1.37772   | 0.03599   | 0.18663     |
| Y | BAY4       | 0.11977   | 0.01498   | 0.24755   | 0.00757   | 0.32919     |
|   | BAY5       | 0.13877   | 0.26875   | 5.14363   | 0.0405    | 0.24377     |
|   | BAY6       | 0.04266   | 0.04025   | 0.23678   | 0.00911   | 0.10747     |
|   | BAY7       | 0.04426   | 0.01525   | 0.0931    | 0.00321   | 0.17298     |
| Y | BAY8       | 0.11591   | 0.02601   | 0.4157    | 0.01538   | 0.22726     |
|   | BAY9       | 0.03457   | 0.01567   | 0.07468   | 0.00352   | 0.16631     |
|   | BAY10      | 0.05907   | 0.15801   | 1.28674   | 0.0344    | 0.02075     |
|   | BAY11      | 0.04203   | 0.03144   | 0.18219   | 0.00742   | 0.14497     |
|   | BAY12      | 0.04552   | 0.01182   | 0.07416   | 0.00259   | 0.1302      |
|   | BAY13      | 0.05088   | 0.03571   | 0.25053   | 0.01079   | 0.12242     |
|   | BAY14      | 0.05032   | 0.03687   | 0.25579   | 0.01133   | 0.1894      |
|   | BAY15      | 0.04949   | 0.03611   | 0.24636   | 0.01134   | 0.16827     |
|   | BAY16      | 0.05031   | 0.03276   | 0.2272    | 0.01023   | 0.10582     |
|   | BAY17      | 0.04884   | 0.01963   | 0.13216   | 0.00621   | 0.2506      |
|   | BAY18      | 0.04996   | 0.01356   | 0.09341   | 0.00428   | 0.29485     |
|   | BAY19      | 0.07722   | 0.18952   | 2.01686   | 0.05324   | 0.16386     |
| Y | BAY20      | 0.08719   | 0.01694   | 0.20351   | 0.0066    | 0.25995     |
|   | BAY21      | 0.04849   | 0.01587   | 0.10601   | 0.00543   | 0.14676     |
|   | BAY22      | 0.05068   | 0.03787   | 0.26449   | 0.01027   | 0.11379     |
|   | BAY23      | 0.06233   | 0.08237   | 0.70741   | 0.02538   | 0.34511     |
|   | BAY24      | 0.0504    | 0.03129   | 0.21727   | 0.01029   | 0.16946     |
|   | BAY25      | 0.04718   | 0.00551   | 0.03584   | 0.00208   | 0.19986     |
|   | BAY26      | 0.04849   | 0.01501   | 0.10028   | 0.00521   | 0.25944     |
|   | BAY27      | 0.05234   | 0.04058   | 0.29256   | 0.01286   | 0.12869     |
|   | BAY28      | 0.04866   | 0.01542   | 0.10333   | 0.00503   | 0.25716     |
|   | BAY29      | 0.04887   | 0.0146    | 0.09825   | 0.00469   | 0.30692     |
|   | BAY30      | 0.05856   | 0.08016   | 0.64647   | 0.02516   | 0.07366     |
|   | BAY31      | 0.0529    | 0.02954   | 0.2152    | 0.00972   | 0.10939     |
|   | BAY32      | 0.0523    | 0.04433   | 0.31929   | 0.01447   | 0.13123     |
|   | BAY33      | 0.05279   | 0.03165   | 0.23014   | 0.01042   | 0.13758     |
|   | BAY34      | 0.04965   | 0.02324   | 0.15889   | 0.00774   | 0.18948     |
|   | BAY35      | 0.05411   | 0.08033   | 0.5986    | 0.02411   | 0.69516     |
|   | BAY36      | 0.05435   | 0.01747   | 0.13078   | 0.00561   | 0.17647     |

|   |       |          |         |         |         |         |
|---|-------|----------|---------|---------|---------|---------|
|   | BAY37 | 0.04726  | 0.00484 | 0.03153 | 0.00214 | 0.40086 |
|   | BAY38 | 0.04482  | 0.01582 | 0.09766 | 0.00489 | 0.20661 |
|   | BAY39 | 0.08265  | 0.1723  | 1.96108 | 0.05827 | 0.11548 |
|   | BAY40 | 0.06098  | 0.0959  | 0.80537 | 0.02936 | 0.12662 |
|   | BAY41 | 0.05639  | 0.08434 | 0.65501 | 0.02756 | 0.29845 |
|   | BAY42 | 0.05628  | 0.03562 | 0.27604 | 0.01225 | 0.15694 |
|   | BAY43 | 0.0616   | 0.09543 | 0.80959 | 0.03016 | 0.60319 |
|   | BAY44 | 0.0492   | 0.01575 | 0.10669 | 0.00524 | 0.17214 |
|   | BAY45 | 0.05378  | 0.04823 | 0.35724 | 0.01618 | 0.24635 |
|   | BAY46 | 0.04825  | 0.01946 | 0.12934 | 0.00704 | 0.19836 |
|   | BAY47 | 0.04866  | 0.00937 | 0.0628  | 0.00288 | 0.18948 |
|   | BAY48 | 0.04695  | 0.01548 | 0.10009 | 0.00469 | 0.21037 |
| Y | BAY49 | -2.23768 | 7.58158 | *****   | -0.1463 | 1.68915 |
|   | BAY50 | 0.04807  | 0.01687 | 0.1117  | 0.00539 | 0.26656 |
|   | BAY51 | 0.04962  | 0.03187 | 0.21786 | 0.01134 | 0.17675 |
|   | BAY52 | 0.04732  | 0.0137  | 0.08932 | 0.00508 | 0.2091  |
|   | BAY53 | 0.04566  | 0.00531 | 0.0334  | 0.00195 | 0.21363 |
|   | BAY54 | 0.04797  | 0.01158 | 0.07653 | 0.00364 | 0.21194 |
|   | BAY55 | 0.05763  | 0.01648 | 0.13092 | 0.00502 | 0.25584 |
|   | BAY56 | 0.0475   | 0.02406 | 0.15753 | 0.00786 | 0.20923 |
|   | BAY57 | 0.04959  | 0.00513 | 0.03506 | 0.00199 | 0.1548  |
|   | BAY58 | 0.06909  | 0.14421 | 1.37336 | 0.04564 | 0.19864 |
|   | BAY59 | 0.05254  | 0.01518 | 0.10999 | 0.00482 | 0.4499  |
|   | BAY60 | 0.05882  | 0.0925  | 0.75021 | 0.02813 | 0.23481 |
| Y | BAY61 | 0.07411  | 0.05318 | 0.54364 | 0.01985 | 0.24542 |
|   | BAY62 | 0.04956  | 0.01441 | 0.09854 | 0.00473 | 0.12746 |
|   | BAY63 | 0.04708  | 0.01255 | 0.08151 | 0.0041  | 0.39655 |
|   | BAY64 | 0.08265  | 0.17726 | 2.02129 | 0.0557  | 0.60989 |
|   | BAY65 | 0.04653  | 0.01249 | 0.08021 | 0.00437 | 0.23575 |
|   | BAY66 | 0.05127  | 0.03878 | 0.27435 | 0.01045 | 0.12533 |
|   | BAY67 | 0.09919  | 0.2885  | 3.94981 | 0.08328 | 0.29564 |

Table 6

Zircon data from sample 2C (JBC2WAL137) (Bayah Formation, G. Walat).

GLITTER!: Isotope ratios.

|   | Analysis_# | Pb207/Pb2 | Pb206/U23 | Pb207/U23 | Pb208/Th2 | Pb208/Pb2 | Th232/U23 | U238/Si29 |
|---|------------|-----------|-----------|-----------|-----------|-----------|-----------|-----------|
| Y | 2137-1     | 0.14917   | 0.31438   | 6.27763   | 0.10673   | 0.32805   | 0.85375   | 0.02242   |
|   | 2137-2     | 0.07814   | 0.20089   | 2.16174   | 0.06599   | 0.13605   | 0.36597   | 0.07495   |
| Y | 2137-3     | 0.67741   | 0.66074   | 32.16761  | 1.65281   | 1.37975   | 0.48734   | -0.00285  |
|   | 2137-4     | 0.05849   | 0.08358   | 0.6739    | 0.02769   | 0.36605   | 0.97625   | 0.02713   |
|   | 2137-5     | 0.07914   | 0.19948   | 2.14529   | 0.06465   | 0.18136   | 0.4944    | 0.05651   |
| Y | 2137-6     | 0.10293   | 0.01719   | 0.23191   | 0.00849   | 0.34795   | 0.62251   | 0.02102   |
| Y | 2137-7     | 0.11945   | 0.21787   | 3.48472   | 0.08759   | 0.39495   | 0.86796   | 0.01565   |
|   | 2137-8     | 0.05325   | 0.01929   | 0.13704   | 0.00678   | 0.25901   | 0.65099   | 0.0337    |
|   | 2137-9     | 0.09796   | 0.28703   | 3.87926   | 0.09049   | 0.13666   | 0.38296   | 0.01641   |
|   | 2137-10    | 0.05317   | 0.0228    | 0.16678   | 0.00799   | 0.21552   | 0.54337   | 0.10841   |
|   | 2137-11    | 0.0545    | 0.01606   | 0.11826   | 0.00539   | 0.31814   | 0.83775   | 0.05328   |
|   | 2137-12    | 0.05575   | 0.01868   | 0.14126   | 0.00635   | 0.24466   | 0.63587   | 0.02477   |
|   | 2137-13    | 0.07105   | 0.16517   | 1.59145   | 0.05147   | 0.07217   | 0.20462   | 0.07427   |

|   |         |         |         |          |         |         |         |         |
|---|---------|---------|---------|----------|---------|---------|---------|---------|
|   | 2137-14 | 0.05998 | 0.09126 | 0.7451   | 0.02835 | 0.23548 | 0.66978 | 0.04375 |
|   | 2137-15 | 0.07019 | 0.14288 | 1.32628  | 0.05769 | 0.06612 | 0.14467 | 0.08725 |
| Y | 2137-16 | 0.06575 | 0.01758 | 0.15603  | 0.00675 | 0.2626  | 0.60391 | 0.02118 |
| Y | 2137-17 | 0.11157 | 0.2434  | 3.75853  | 0.05817 | 0.09137 | 0.33775 | 0.12346 |
|   | 2137-18 | 0.05668 | 0.05128 | 0.39408  | 0.01701 | 0.17351 | 0.46212 | 0.03669 |
|   | 2137-19 | 0.05754 | 0.08406 | 0.66739  | 0.02733 | 0.14152 | 0.38458 | 0.11575 |
|   | 2137-20 | 0.05601 | 0.0132  | 0.10176  | 0.00447 | 0.37678 | 0.98361 | 0.06308 |
|   | 2137-21 | 0.05258 | 0.0253  | 0.18287  | 0.0088  | 0.17242 | 0.43773 | 0.09109 |
|   | 2137-22 | 0.0661  | 0.12643 | 1.13042  | 0.04042 | 0.20641 | 0.57043 | 0.04934 |
|   | 2137-23 | 0.07014 | 0.14398 | 1.3436   | 0.04651 | 0.27639 | 0.75597 | 0.07941 |
|   | 2137-24 | 0.0537  | 0.03535 | 0.26257  | 0.01206 | 0.23694 | 0.61381 | 0.12483 |
|   | 2137-25 | 0.07836 | 0.19203 | 1.99035  | 0.06243 | 0.06752 | 0.18347 | 0.07263 |
|   | 2137-26 | 0.05432 | 0.03479 | 0.2548   | 0.01261 | 0.125   | 0.30471 | 0.06327 |
|   | 2137-27 | 0.149   | 0.39596 | 8.1146   | 0.11761 | 0.01213 | 0.03609 | 0.63675 |
| Y | 2137-28 | 0.12014 | 0.01925 | 0.31413  | 0.00352 | 0.12034 | 0.58093 | 0.0104  |
|   | 2137-29 | 0.04838 | 0.01457 | 0.09701  | 0.00515 | 0.1174  | 0.29341 | 0.10809 |
|   | 2137-30 | 0.05064 | 0.015   | 0.10282  | 0.00506 | 0.22944 | 0.60118 | 0.07267 |
|   | 2137-31 | 0.05577 | 0.01682 | 0.13021  | 0.00598 | 0.23049 | 0.57257 | 0.19398 |
| Y | 2137-32 | 0.06293 | 0.05021 | 0.4236   | 0.01747 | 0.23796 | 0.60425 | 0.03257 |
|   | 2137-33 | 0.11415 | 0.34688 | 5.35963  | 0.10761 | 0.2898  | 0.82532 | 0.03128 |
|   | 2137-34 | 0.08328 | 0.16002 | 1.81782  | 0.05068 | 0.15961 | 0.44531 | 0.08815 |
|   | 2137-35 | 0.052   | 0.03392 | 0.24095  | 0.0116  | 0.19745 | 0.50987 | 0.2017  |
|   | 2137-36 | 0.10966 | 0.32261 | 4.92779  | 0.07855 | 0.02622 | 0.09515 | 0.16962 |
| Y | 2137-37 | 0.76024 | 0.99849 | 99.24692 | 0.61052 | 1.81138 | 2.6174  | 0.00482 |
|   | 2137-38 | 0.05159 | 0.01704 | 0.11693  | 0.00594 | 0.25572 | 0.64809 | 0.03574 |
|   | 2137-39 | 0.06125 | 0.1108  | 0.93685  | 0.03846 | 0.10425 | 0.26539 | 0.08311 |
|   | 2137-40 | 0.05819 | 0.08655 | 0.70042  | 0.02877 | 0.26677 | 0.70912 | 0.02725 |
|   | 2137-41 | 0.0486  | 0.01655 | 0.10681  | 0.00596 | 0.25968 | 0.63687 | 0.04345 |
|   | 2137-42 | 0.05168 | 0.01254 | 0.08888  | 0.00444 | 0.20912 | 0.52143 | 0.08892 |
|   | 2137-43 | 0.07085 | 0.16657 | 1.62035  | 0.05435 | 0.39588 | 1.07209 | 0.0147  |
|   | 2137-44 | 0.08001 | 0.18934 | 2.08081  | 0.06303 | 0.21594 | 0.57317 | 0.42202 |
|   | 2137-45 | 0.05285 | 0.01706 | 0.11784  | 0.00628 | 0.25083 | 0.60195 | 0.02477 |
|   | 2137-46 | 0.16081 | 0.47376 | 10.59296 | 0.14387 | 0.38385 | 1.11692 | 0.09679 |
|   | 2137-47 | 0.07818 | 0.2014  | 2.10138  | 0.06488 | 0.39898 | 1.0944  | 0.00481 |
|   | 2137-48 | 0.06602 | 0.08997 | 0.7882   | 0.03064 | 0.4249  | 1.10259 | 0.01937 |
|   | 2137-49 | 0.05381 | 0.02051 | 0.14724  | 0.00738 | 0.23038 | 0.56557 | 0.04236 |
|   | 2137-50 | 0.05392 | 0.05598 | 0.41567  | 0.02003 | 0.10233 | 0.25278 | 0.06846 |
| Y | 2137-51 | 0.13166 | 0.18588 | 3.31489  | 0.0648  | 0.12947 | 0.32823 | 0.07111 |
|   | 2137-52 | 0.06244 | 0.08822 | 0.73268  | 0.02917 | 0.36159 | 0.9666  | 0.01513 |
|   | 2137-53 | 0.05632 | 0.0184  | 0.13961  | 0.0065  | 0.28433 | 0.71097 | 0.01736 |
|   | 2137-54 | 0.06165 | 0.10089 | 0.82984  | 0.03271 | 0.46362 | 1.26399 | 0.03589 |
|   | 2137-55 | 0.07803 | 0.19788 | 2.11973  | 0.06395 | 0.24829 | 0.67901 | 0.10375 |
| Y | 2137-56 | 0.79156 | 1.13699 | 100.0863 | 2.90303 | 1.9815  | 0.68594 | 0.18026 |
|   | 2137-57 | 0.10734 | 0.32824 | 4.79986  | 0.10612 | 0.11443 | 0.31286 | 0.04731 |
|   | 2137-58 | 0.05115 | 0.03698 | 0.26083  | 0.01319 | 0.09669 | 0.23956 | 0.18752 |
|   | 2137-59 | 0.05542 | 0.02155 | 0.16014  | 0.00792 | 0.18354 | 0.44141 | 0.02529 |
|   | 2137-60 | 0.06961 | 0.1588  | 1.50523  | 0.05212 | 0.13852 | 0.3731  | 0.03123 |
|   | 2137-61 | 0.0545  | 0.04943 | 0.36182  | 0.01717 | 0.26446 | 0.67288 | 0.04437 |
|   | 2137-62 | 0.05423 | 0.02276 | 0.16438  | 0.00885 | 0.16686 | 0.37925 | 0.03302 |
|   | 2137-63 | 0.06112 | 0.01708 | 0.14346  | 0.00626 | 0.26463 | 0.63859 | 0.02847 |
|   | 2137-64 | 0.05142 | 0.01382 | 0.09496  | 0.00466 | 0.41249 | 1.08056 | 0.05967 |



|   |         |         |         |         |         |         |         |         |
|---|---------|---------|---------|---------|---------|---------|---------|---------|
| Y | 2137-65 | 0.06119 | 0.03886 | 0.32779 | 0.01438 | 0.1708  | 0.40809 | 0.26811 |
|   | 2137-66 | 0.05365 | 0.03683 | 0.26857 | 0.01201 | 0.45685 | 1.23862 | 0.21288 |
| Y | 2137-67 | 0.071   | 0.0383  | 0.36776 | 0.01592 | 0.25328 | 0.53856 | 0.09253 |
|   | 2137-68 | 0.05678 | 0.06031 | 0.47156 | 0.01903 | 0.27554 | 0.77192 | 0.04837 |
|   | 2137-69 | 0.05979 | 0.01578 | 0.12528 | 0.00684 | 0.22942 | 0.46791 | 0.03808 |
|   | 2137-70 | 0.0518  | 0.02135 | 0.14805 | 0.0067  | 0.3498  | 0.98549 | 0.07305 |
|   | 2137-71 | 0.11579 | 0.34302 | 5.52248 | 0.10662 | 0.16585 | 0.47185 | 0.10025 |
|   | 2137-72 | 0.05292 | 0.04146 | 0.29244 | 0.01384 | 0.19108 | 0.50601 | 0.07718 |
|   | 2137-73 | 0.12038 | 0.38412 | 6.25505 | 0.1132  | 0.3381  | 1.01458 | 0.04032 |
|   | 2137-74 | 0.05417 | 0.04229 | 0.31231 | 0.01481 | 0.16658 | 0.42063 | 0.09015 |
|   | 2137-75 | 0.04985 | 0.02019 | 0.13532 | 0.00706 | 0.25054 | 0.63322 | 0.02339 |
|   | 2137-76 | 0.05398 | 0.0485  | 0.35195 | 0.01657 | 0.1275  | 0.3302  | 0.06569 |
| Y | 2137-77 | 0.28949 | 0.01928 | 0.75442 | 0.01061 | 1.07394 | 1.72623 | 0.09662 |
|   | 2137-78 | 0.11292 | 0.35326 | 5.4282  | 0.10236 | 0.14039 | 0.42857 | 0.03756 |
|   | 2137-79 | 0.10764 | 0.32599 | 4.83114 | 0.09578 | 0.07934 | 0.23884 | 0.06326 |
|   | 2137-80 | 0.05585 | 0.01786 | 0.13516 | 0.00572 | 0.3049  | 0.84205 | 0.03066 |
|   | 2137-81 | 0.07287 | 0.13575 | 1.30776 | 0.04137 | 0.42521 | 1.23435 | 0.03249 |
|   | 2137-82 | 0.07237 | 0.14593 | 1.37904 | 0.04693 | 0.29439 | 0.80995 | 0.00332 |
|   | 2137-83 | 0.06407 | 0.11797 | 1.01275 | 0.03918 | 0.08582 | 0.22862 | 0.07574 |
|   | 2137-84 | 0.06625 | 0.01842 | 0.16485 | 0.00667 | 0.2958  | 0.72236 | 0.0283  |
|   | 2137-85 | 0.07155 | 0.15257 | 1.48039 | 0.04768 | 0.58728 | 1.66292 | 0.03256 |
| Y | 2137-86 | 0.10474 | 0.02245 | 0.31916 | 0.00809 | 0.69313 | 1.70115 | 0.22107 |
|   | 2137-87 | 0.08024 | 0.20932 | 2.22241 | 0.06499 | 0.34772 | 0.99109 | 0.0198  |

Table 7

Zircon data from sample 22D (JBC2CIK117) (Cikalong Formation).

GLITTER!: Isotope ratios.

|   | Analysis_# | Pb207/Pb2 | Pb206/U23 | Pb207/U23 | Pb208/Th2 | Pb208/Pb2 | Th232/U23 | U238/Si29 |
|---|------------|-----------|-----------|-----------|-----------|-----------|-----------|-----------|
| Y | 2117-1     | 0.16464   | 0.20036   | 4.63732   | 0.04015   | 0.1538    | 0.686     | 0.14301   |
|   | 2117-2     | 0.06101   | 0.09686   | 0.82217   | 0.03195   | 0.66882   | 1.81221   | 0.03151   |
|   | 2117-3     | 0.0524    | 0.01901   | 0.13916   | 0.00702   | 0.24901   | 0.60305   | 0.04403   |
|   | 2117-4     | 0.08132   | 0.19214   | 2.1347    | 0.06231   | 0.31333   | 0.86352   | 0.03361   |
|   | 2117-5     | 0.0619    | 0.09114   | 0.76985   | 0.02916   | 0.33181   | 0.92682   | 0.03395   |
|   | 2117-6     | 0.1082    | 0.30199   | 4.53205   | 0.08876   | 0.29587   | 0.89953   | 0.0311    |
| Y | 2117-7     | 0.11439   | 0.00526   | 0.08415   | 0.00344   | 0.29433   | 0.4021    | 0.25345   |
|   | 2117-8     | 0.05155   | 0.02412   | 0.1701    | 0.00785   | 0.15153   | 0.41626   | 0.02739   |
|   | 2117-9     | 0.04854   | 0.01673   | 0.11324   | 0.00531   | 0.21667   | 0.60974   | 0.10058   |
|   | 2117-10    | 0.05295   | 0.03872   | 0.28423   | 0.02264   | 0.08411   | 0.12849   | 0.19263   |
|   | 2117-11    | 0.05193   | 0.03625   | 0.26391   | 0.01138   | 0.17135   | 0.48778   | 0.06734   |
|   | 2117-12    | 0.07837   | 0.17905   | 1.89479   | 0.05262   | 0.26126   | 0.7941    | 0.01794   |
|   | 2117-13    | 0.05029   | 0.01912   | 0.13295   | 0.00614   | 0.24681   | 0.68609   | 0.06683   |
| Y | 2117-14    | 0.07202   | 0.07882   | 0.79421   | 0.02707   | 0.34341   | 0.89308   | 0.27737   |
| Y | 2117-15    | 0.64696   | 0.22415   | 19.53997  | 0.10596   | 1.6029    | 3.02832   | 0.009     |
|   | 2117-16    | 0.05271   | 0.02314   | 0.16634   | 0.00727   | 0.10891   | 0.30982   | 0.02634   |
|   | 2117-17    | 0.06741   | 0.12957   | 1.2229    | 0.03934   | 0.04368   | 0.12846   | 0.09852   |
|   | 2117-18    | 0.07216   | 0.15103   | 1.49097   | 0.0447    | 0.11034   | 0.33293   | 0.02405   |
|   | 2117-19    | 0.0518    | 0.0368    | 0.26039   | 0.01141   | 0.18094   | 0.52117   | 0.03023   |
|   | 2117-20    | 0.05956   | 0.01655   | 0.13486   | 0.00578   | 0.17945   | 0.4589    | 0.01637   |

|   |         |         |         |          |         |         |         |         |
|---|---------|---------|---------|----------|---------|---------|---------|---------|
| Y | 2117-21 | 0.14471 | 0.01537 | 0.30082  | 0.01082 | 0.3055  | 0.38745 | 0.04758 |
|   | 2117-22 | 0.05408 | 0.04129 | 0.30369  | 0.02111 | 0.06526 | 0.11397 | 0.0623  |
|   | 2117-23 | 0.05171 | 0.02334 | 0.16819  | 0.00745 | 0.32932 | 0.9213  | 0.09157 |
|   | 2117-24 | 0.05432 | 0.05473 | 0.41554  | 0.01782 | 0.09583 | 0.26269 | 0.12457 |
|   | 2117-25 | 0.0852  | 0.21181 | 2.50102  | 0.06137 | 0.23521 | 0.72458 | 0.01752 |
|   | 2117-26 | 0.05391 | 0.03364 | 0.25221  | 0.01042 | 0.18165 | 0.52361 | 0.03186 |
|   | 2117-27 | 0.05144 | 0.03286 | 0.2304   | 0.01013 | 0.03608 | 0.10444 | 0.08508 |
| Y | 2117-28 | 0.10604 | 0.03005 | 0.43927  | 0.01774 | 0.25942 | 0.39205 | 0.02699 |
| Y | 2117-29 | 0.07227 | 0.01724 | 0.16831  | 0.00539 | 0.43688 | 1.24824 | 0.05473 |
|   | 2117-30 | 0.05877 | 0.08566 | 0.69771  | 0.02608 | 0.16619 | 0.48701 | 0.09218 |
|   | 2117-31 | 0.05141 | 0.03196 | 0.23031  | 0.00987 | 0.0891  | 0.25746 | 0.13772 |
|   | 2117-32 | 0.05303 | 0.0419  | 0.30541  | 0.01288 | 0.11588 | 0.33625 | 0.07983 |
|   | 2117-33 | 0.05719 | 0.07955 | 0.62216  | 0.02389 | 0.31578 | 0.93816 | 0.04082 |
|   | 2117-34 | 0.0741  | 0.16587 | 1.69732  | 0.04816 | 0.13528 | 0.41558 | 0.03465 |
|   | 2117-35 | 0.80137 | 1.0365  | 113.8447 | 0.52644 | 1.79739 | 3.15661 | 0.00262 |
| Y | 2117-36 | 0.0491  | 0.00492 | 0.03385  | 0.00162 | 0.10058 | 0.27229 | 0.28749 |
|   | 2117-37 | 0.06385 | 0.10252 | 0.8992   | 0.04171 | 0.05075 | 0.11125 | 0.12481 |
|   | 2117-38 | 0.0776  | 0.13886 | 1.50359  | 0.04402 | 0.23355 | 0.65703 | 0.07176 |
|   | 2117-39 | 0.0518  | 0.03315 | 0.23891  | 0.01009 | 0.14663 | 0.42947 | 0.17704 |
|   | 2117-40 | 0.05526 | 0.02861 | 0.20954  | 0.01026 | 0.17193 | 0.42754 | 0.01276 |
|   | 2117-41 | 0.05805 | 0.013   | 0.10289  | 0.0044  | 0.21052 | 0.55495 | 0.06285 |
|   | 2117-42 | 0.04964 | 0.01388 | 0.09579  | 0.00449 | 0.19406 | 0.53533 | 0.14199 |
|   | 2117-43 | 0.08223 | 0.16776 | 1.90702  | 0.05379 | 0.15585 | 0.43329 | 0.11582 |
|   | 2117-44 | 0.05522 | 0.01752 | 0.1301   | 0.00581 | 0.19991 | 0.5376  | 0.04922 |
|   | 2117-45 | 0.05791 | 0.00546 | 0.0424   | 0.00174 | 0.26446 | 0.74037 | 0.0225  |
|   | 2117-46 | 0.05258 | 0.03688 | 0.26532  | 0.01147 | 0.14527 | 0.41634 | 0.02446 |
|   | 2117-47 | 0.10861 | 0.30282 | 4.41822  | 0.08735 | 0.10537 | 0.32558 | 0.05783 |
|   | 2117-48 | 0.05309 | 0.01251 | 0.09174  | 0.00394 | 0.33669 | 0.95372 | 0.06046 |
|   | 2117-49 | 0.11226 | 0.13808 | 2.08061  | 0.07456 | 0.17588 | 0.29029 | 0.02143 |
|   | 2117-50 | 0.06212 | 0.0978  | 0.84525  | 0.02936 | 0.22523 | 0.66849 | 0.08399 |
| Y | 2117-51 | 0.05905 | 0.08961 | 0.73949  | 0.0269  | 0.08493 | 0.25211 | 0.13427 |
|   | 2117-52 | 0.10499 | 0.18471 | 2.73282  | 0.05409 | 0.58351 | 1.77559 | 0.00888 |
|   | 2117-53 | 0.06431 | 0.12121 | 1.0477   | 0.03656 | 0.07145 | 0.21108 | 0.05252 |
| Y | 2117-54 | 0.10508 | 0.26688 | 3.82072  | 0.07639 | 0.20024 | 0.62327 | 0.0477  |
|   | 2117-55 | 0.06572 | 0.03318 | 0.30108  | 0.01224 | 0.17463 | 0.42179 | 0.14062 |
|   | 2117-56 | 0.04766 | 0.01795 | 0.11822  | 0.00564 | 0.20199 | 0.57282 | 0.02314 |
|   | 2117-57 | 0.06943 | 0.14994 | 1.41203  | 0.04628 | 0.15062 | 0.43469 | 0.03604 |
| Y | 2117-58 | 0.04862 | 0.0167  | 0.11216  | 0.00541 | 0.1979  | 0.54394 | 0.22913 |
|   | 2117-59 | 0.06147 | 0.03611 | 0.30554  | 0.01353 | 0.17233 | 0.40955 | 0.07941 |
|   | 2117-60 | 0.0547  | 0.05632 | 0.429    | 0.01724 | 0.2537  | 0.73804 | 0.05145 |
|   | 2117-61 | 0.05329 | 0.03372 | 0.25488  | 0.01097 | 0.15138 | 0.41427 | 0.11719 |
|   | 2117-62 | 0.0757  | 0.13274 | 1.36894  | 0.04386 | 0.15493 | 0.41762 | 0.03763 |
|   | 2117-63 | 0.06224 | 0.09016 | 0.75462  | 0.02662 | 0.51657 | 1.55822 | 0.03237 |
|   | 2117-64 | 0.05581 | 0.06732 | 0.51798  | 0.02033 | 0.14518 | 0.42806 | 0.04977 |
|   | 2117-65 | 0.05776 | 0.01565 | 0.1245   | 0.00546 | 0.22132 | 0.56464 | 0.01072 |
|   | 2117-66 | 0.06903 | 0.14419 | 1.36108  | 0.04757 | 0.20442 | 0.55167 | 0.0131  |
|   | 2117-67 | 0.79215 | 0.93748 | 102.5866 | 0.9173  | 1.81831 | 1.65458 | 0.01712 |
| Y | 2117-68 | 0.07472 | 0.14382 | 1.49696  | 0.04658 | 0.40074 | 1.10153 | 0.00514 |
|   | 2117-69 | 0.05209 | 0.01648 | 0.11449  | 0.00609 | 0.21377 | 0.51478 | 0.01094 |
|   | 2117-70 | 0.09499 | 0.04227 | 0.55832  | 0.00974 | 0.08146 | 0.31481 | 0.0937  |
|   | 2117-71 | 0.07144 | 0.16039 | 1.60574  | 0.05115 | 0.13562 | 0.37861 | 0.14347 |

|   |         |         |         |         |         |         |         |         |
|---|---------|---------|---------|---------|---------|---------|---------|---------|
| Y | 2117-72 | 0.06084 | 0.09088 | 0.77342 | 0.02942 | 0.6765  | 1.8605  | 0.01507 |
|   | 2117-73 | 0.07693 | 0.18218 | 1.94506 | 0.05678 | 0.69595 | 1.98778 | 0.04703 |
|   | 2117-74 | 0.06639 | 0.01801 | 0.16062 | 0.00648 | 0.45232 | 1.11958 | 0.05824 |
|   | 2117-75 | 0.14552 | 0.41421 | 8.08329 | 0.1242  | 0.1624  | 0.48205 | 0.03165 |
|   | 2117-76 | 0.04813 | 0.00522 | 0.03486 | 0.00173 | 0.22682 | 0.61038 | 0.31414 |
|   | 2117-77 | 0.08556 | 0.19079 | 2.20191 | 0.07683 | 0.13876 | 0.30667 | 0.04398 |
|   | 2117-78 | 0.16048 | 0.43788 | 9.63551 | 0.12753 | 0.21715 | 0.66351 | 0.02115 |
|   | 2117-79 | 0.07401 | 0.16299 | 1.6718  | 0.05106 | 0.05801 | 0.16477 | 0.2001  |
|   | 2117-80 | 0.05086 | 0.01816 | 0.1221  | 0.00594 | 0.18867 | 0.51358 | 0.02014 |
|   | 2117-81 | 0.06203 | 0.09748 | 0.84311 | 0.0355  | 0.12246 | 0.29922 | 0.07944 |
|   | 2117-82 | 0.05394 | 0.04317 | 0.32255 | 0.01399 | 0.25075 | 0.68851 | 0.0487  |
|   | 2117-83 | 0.07283 | 0.14409 | 1.43587 | 0.0478  | 0.18317 | 0.49124 | 0.0485  |
|   | 2117-84 | 0.05908 | 0.08476 | 0.67953 | 0.028   | 0.16421 | 0.44222 | 0.05448 |
|   | 2117-85 | 0.07769 | 0.18754 | 1.92433 | 0.0571  | 0.30745 | 0.89839 | 0.00983 |

Table 8

Zircon data from sample 13B (JBC2CIJ191) (Cijengkol Formation).

GLITTER!: Isotope ratios.

|   | Analysis_# | Pb207/Pb2 | Pb206/U23 | Pb207/U23 | Pb208/Th2 | Pb208/Pb2 | Th232/U23 | U238/Si29 |
|---|------------|-----------|-----------|-----------|-----------|-----------|-----------|-----------|
| Y | 191CIJ1    | 0.06693   | 0.02495   | 0.16557   | 0.00573   | 0.1681    | 0.63574   | 0.01362   |
| Y | 191CIJ2    | 0.04931   | 0.02655   | 0.17875   | 0.00701   | 0.16812   | 0.55312   | 0.14046   |
| Y | 191CIJ3    | 0.04953   | 0.03308   | 0.23      | 0.0091    | 0.06966   | 0.22001   | 0.09581   |
| Y | 191CIJ4    | 0.16847   | 0.65307   | 10.49701  | 0.10621   | 0.12582   | 0.67276   | 0.02764   |
| Y | 191CIJ5    | 0.05861   | 0.05331   | 0.29698   | 0.01068   | 0.11897   | 0.51676   | 0.0142    |
| Y | 191CIJ6    | 0.05196   | 0.02508   | 0.17572   | 0.00702   | 0.12395   | 0.38569   | 0.07063   |
| Y | 191CIJ7    | 0.0537    | 0.0552    | 0.279     | 0.01089   | 0.19939   | 0.88018   | 0.01133   |
| Y | 191CIJ8    | 0.05027   | 0.04658   | 0.22232   | 0.00909   | 0.10549   | 0.47096   | 0.03737   |
| Y | 191CIJ9    | 0.07507   | 0.27185   | 1.86622   | 0.0466    | 0.28933   | 1.47117   | 0.02285   |
| Y | 191CIJ10   | 0.07641   | 0.26332   | 1.935     | 0.04621   | 0.1928    | 0.95824   | 0.01859   |
|   | 191CIJ11   | 0.05072   | 0.00794   | 0.05578   | 0.00148   | 0.27996   | 1.31095   | 0.21447   |
|   | 191CIJ12   | 0.05006   | 0.03212   | 0.22118   | 0.0088    | 0.12255   | 0.39063   | 0.07797   |
| Y | 191CIJ13   | 0.06994   | 0.09263   | 0.61812   | 0.01821   | 0.23651   | 1.05099   | 0.01282   |
| Y | 191CIJ14   | 0.07798   | 0.26922   | 1.96272   | 0.04899   | 0.17329   | 0.8322    | 0.00952   |
|   | 191CIJ15   | 0.05768   | 0.07946   | 0.64225   | 0.01476   | 0.00703   | 0.03311   | 0.11023   |
|   | 191CIJ16   | 0.06128   | 0.01604   | 0.09076   | 0.00349   | 0.26265   | 1.05517   | 0.02307   |
| Y | 191CIJ17   | 0.07342   | 0.24673   | 1.72575   | 0.04521   | 0.11748   | 0.56116   | 0.01846   |
| Y | 191CIJ18   | 0.07378   | 0.20194   | 1.58092   | 0.04293   | 0.13662   | 0.56274   | 0.04587   |
| Y | 191CIJ19   | 0.05889   | 0.09532   | 0.54012   | 0.01875   | 0.2651    | 1.18058   | 0.03462   |
| Y | 191CIJ20   | 0.07865   | 0.26794   | 1.98913   | 0.05007   | 0.2198    | 1.03107   | 0.01212   |
|   | 191CIJ21   | 0.04897   | 0.03249   | 0.22186   | 0.00944   | 0.05254   | 0.15879   | 0.27637   |
| Y | 191CIJ22   | 0.0995    | 0.39298   | 3.70271   | 0.07149   | 0.09352   | 0.4516    | 0.01594   |
|   | 191CIJ23   | 0.05168   | 0.0142    | 0.10058   | 0.00457   | 0.08152   | 0.22287   | 0.0855    |
| Y | 191CIJ24   | 0.06253   | 0.15985   | 0.9296    | 0.03075   | 0.24162   | 1.10466   | 0.03265   |
| Y | 191CIJ25   | 0.05547   | 0.08892   | 0.47269   | 0.01783   | 0.20146   | 0.884     | 0.03884   |
| Y | 191CIJ26   | 0.06181   | 0.04778   | 0.27759   | 0.01168   | 0.13914   | 0.50099   | 0.02196   |
| Y | 191CIJ27   | 0.09802   | 0.33555   | 3.64246   | 0.07278   | 0.13246   | 0.53799   | 0.04476   |
| Y | 191CIJ28   | 0.0985    | 0.39275   | 3.58745   | 0.0718    | 0.0994    | 0.47927   | 0.02904   |
|   | 191CIJ29   | 0.05865   | 0.03379   | 0.27139   | 0.01135   | 0.12211   | 0.32064   | 0.13389   |
| Y | 191CIJ30   | 0.17732   | 0.61388   | 10.21273  | 0.10665   | 0.10446   | 0.53059   | 0.01041   |

|   |          |         |         |         |         |         |         |         |
|---|----------|---------|---------|---------|---------|---------|---------|---------|
|   | 191CIJ31 | 0.07088 | 0.01326 | 0.13076 | 0.00288 | 0.41256 | 1.67579 | 0.07991 |
|   | 191CIJ32 | 0.05557 | 0.03392 | 0.26076 | 0.01102 | 0.10909 | 0.29667 | 0.08006 |
| Y | 191CIJ33 | 0.05941 | 0.13043 | 0.70451 | 0.02542 | 0.18318 | 0.83089 | 0.024   |
| Y | 191CIJ34 | 0.07447 | 0.25721 | 1.76439 | 0.04877 | 0.15258 | 0.71173 | 0.0189  |
| Y | 191CIJ35 | 0.05892 | 0.12936 | 0.71279 | 0.02514 | 0.19449 | 0.88551 | 0.02139 |
| Y | 191CIJ36 | 0.07391 | 0.46392 | 4.71078 | 0.08342 | 0.04428 | 0.21804 | 0.20012 |
| Y | 191CIJ37 | 0.06364 | 0.02722 | 0.16393 | 0.0058  | 0.18955 | 0.78795 | 0.02366 |
|   | 191CIJ38 | 0.07855 | 0.01892 | 0.14507 | 0.00495 | 0.24618 | 0.83369 | 0.02693 |
| Y | 191CIJ39 | 0.08502 | 0.27859 | 2.17164 | 0.05605 | 0.21741 | 0.95851 | 0.01005 |
| Y | 191CIJ40 | 0.05142 | 0.04879 | 0.23478 | 0.01004 | 0.11714 | 0.50505 | 0.02894 |
| Y | 191CIJ41 | 0.09679 | 0.38335 | 3.57041 | 0.07387 | 0.16249 | 0.74967 | 0.02017 |
| Y | 191CIJ42 | 0.06169 | 0.15397 | 0.90183 | 0.0389  | 0.02196 | 0.0773  | 0.02701 |
|   | 191CIJ43 | 0.05472 | 0.04244 | 0.32483 | 0.01332 | 0.13116 | 0.37192 | 0.0996  |
| Y | 191CIJ44 | 0.08243 | 0.28667 | 2.22026 | 0.05858 | 0.0997  | 0.43449 | 0.02159 |
| Y | 191CIJ45 | 0.10607 | 0.43172 | 4.21235 | 0.08199 | 0.11144 | 0.52286 | 0.04059 |
|   | 191CIJ46 | 0.07125 | 0.02638 | 0.18169 | 0.00749 | 0.15866 | 0.49844 | 0.02461 |
|   | 191CIJ47 | 0.05228 | 0.03459 | 0.2504  | 0.0085  | 0.0843  | 0.30593 | 0.25835 |
|   | 191CIJ48 | 0.05065 | 0.01567 | 0.11027 | 0.00498 | 0.0822  | 0.23093 | 0.25244 |
|   | 191CIJ49 | 0.05365 | 0.05933 | 0.43932 | 0.01783 | 0.07812 | 0.23209 | 0.0665  |
|   | 191CIJ50 | 0.07004 | 0.00764 | 0.05061 | 0.0021  | 0.21966 | 0.71486 | 0.03272 |
|   | 191CIJ51 | 0.05303 | 0.04187 | 0.30135 | 0.01232 | 0.0854  | 0.25956 | 0.09802 |
|   | 191CIJ52 | 0.07801 | 0.03384 | 0.3672  | 0.00947 | 0.26318 | 0.84136 | 0.15391 |
| Y | 191CIJ53 | 0.06665 | 0.12667 | 0.79665 | 0.02743 | 0.2036  | 0.8415  | 0.00639 |
| Y | 191CIJ54 | 0.09146 | 0.05081 | 0.42456 | 0.01816 | 0.18914 | 0.47397 | 0.02319 |
|   | 191CIJ55 | 0.06552 | 0.02311 | 0.14207 | 0.00525 | 0.20379 | 0.80327 | 0.01318 |
| Y | 191CIJ56 | 0.07908 | 0.27756 | 2.09801 | 0.05468 | 0.17319 | 0.78805 | 0.00786 |
|   | 191CIJ57 | 0.07355 | 0.17346 | 1.75558 | 0.05016 | 0.06724 | 0.20857 | 0.06834 |
|   | 191CIJ58 | 0.06507 | 0.02108 | 0.1297  | 0.00521 | 0.17507 | 0.6359  | 0.02544 |
|   | 191CIJ59 | 0.07149 | 0.1602  | 1.58828 | 0.03126 | 0.32111 | 1.47753 | 0.14006 |
| Y | 191CIJ60 | 0.06389 | 0.16214 | 0.98661 | 0.03405 | 0.30126 | 1.28848 | 0.02765 |
|   | 191CIJ61 | 0.05558 | 0.04746 | 0.36142 | 0.01503 | 0.14365 | 0.40797 | 0.1244  |
|   | 191CIJ62 | 0.07434 | 0.17709 | 1.76654 | 0.0495  | 0.09482 | 0.30528 | 0.07009 |
|   | 191CIJ63 | 0.05865 | 0.09766 | 0.73719 | 0.01734 | 0.65804 | 3.33792 | 0.0514  |
| Y | 191CIJ64 | 0.0982  | 0.41133 | 3.71821 | 0.0759  | 0.16207 | 0.79127 | 0.03305 |
| Y | 191CIJ65 | 0.10768 | 0.44469 | 4.52877 | 0.08051 | 0.14044 | 0.69912 | 0.01623 |
| Y | 191CIJ66 | 0.11485 | 0.33364 | 5.30304 | 0.07685 | 0.05095 | 0.19945 | 0.08121 |
|   | 191CIJ67 | 0.05113 | 0.03664 | 0.25465 | 0.01018 | 0.061   | 0.19813 | 0.11885 |
|   | 191CIJ68 | 0.07116 | 0.01497 | 0.09978 | 0.00347 | 0.20454 | 0.7967  | 0.03083 |
| Y | 191CIJ69 | 0.12059 | 0.49794 | 5.56992 | 0.08787 | 0.05341 | 0.27321 | 0.02397 |
| Y | 191CIJ70 | 0.06675 | 0.15679 | 0.99295 | 0.03133 | 0.16976 | 0.76726 | 0.01563 |
|   | 191CIJ71 | 0.06985 | 0.02272 | 0.14837 | 0.00539 | 0.18917 | 0.72006 | 0.01185 |
| Y | 191CIJ72 | 0.06741 | 0.18486 | 1.19076 | 0.03675 | 0.11404 | 0.51838 | 0.02181 |
|   | 191CIJ73 | 0.0566  | 0.04591 | 0.35545 | 0.01474 | 0.11828 | 0.33309 | 0.08406 |
|   | 191CIJ74 | 0.04978 | 0.03264 | 0.22657 | 0.00959 | 0.08616 | 0.26525 | 0.16965 |
| Y | 191CIJ75 | 0.07686 | 0.27123 | 1.97362 | 0.05266 | 0.17833 | 0.83096 | 0.00945 |
|   | 191CIJ76 | 0.04759 | 0.01951 | 0.12727 | 0.00583 | 0.09208 | 0.27866 | 0.06828 |
| Y | 191CIJ77 | 0.06629 | 0.2071  | 1.27539 | 0.04027 | 0.13929 | 0.6484  | 0.02837 |
|   | 191CIJ78 | 0.06735 | 0.12693 | 1.18406 | 0.03826 | 0.0811  | 0.24363 | 0.12793 |
| Y | 191CIJ79 | 0.05622 | 0.10005 | 0.54018 | 0.01965 | 0.15207 | 0.70142 | 0.03927 |
| Y | 191CIJ80 | 0.24851 | 0.03694 | 0.86653 | 0.02108 | 0.51299 | 0.81453 | 0.02317 |
|   | 191CIJ81 | 0.07153 | 0.02364 | 0.1595  | 0.00625 | 0.17796 | 0.6105  | 0.03229 |

|   |          |         |         |          |         |         |         |         |
|---|----------|---------|---------|----------|---------|---------|---------|---------|
| Y | 191CIJ82 | 0.05632 | 0.09169 | 0.55248  | 0.0203  | 0.09281 | 0.38011 | 0.03818 |
| Y | 191CIJ83 | 0.14644 | 0.47102 | 6.52288  | 0.11185 | 0.28318 | 1.08164 | 0.01994 |
|   | 191CIJ84 | 0.05247 | 0.04307 | 0.31484  | 0.01304 | 0.1325  | 0.39688 | 0.09469 |
|   | 191CIJ85 | 0.06905 | 0.0257  | 0.17253  | 0.00619 | 0.21492 | 0.80891 | 0.00873 |
|   | 191CIJ86 | 0.05178 | 0.03993 | 0.28605  | 0.01211 | 0.13037 | 0.38991 | 0.07869 |
|   | 191CIJ87 | 0.05185 | 0.03443 | 0.24484  | 0.01031 | 0.16181 | 0.49027 | 0.08895 |
|   | 191CIJ88 | 0.06773 | 0.02589 | 0.16353  | 0.00666 | 0.17355 | 0.61212 | 0.01161 |
| Y | 191CIJ89 | 0.07986 | 0.33045 | 2.6049   | 0.06139 | 0.13327 | 0.65095 | 0.03285 |
|   | 191CIJ90 | 0.05817 | 0.09089 | 0.72545  | 0.02755 | 0.05031 | 0.15064 | 0.09891 |
|   | 191CIJ91 | 0.0781  | 0.05468 | 0.37887  | 0.01357 | 0.25849 | 0.9452  | 0.01944 |
|   | 191CIJ92 | 0.17341 | 0.4122  | 9.94553  | 0.13791 | 0.02379 | 0.06452 | 0.10737 |
|   | 191CIJ93 | 0.04999 | 0.02715 | 0.18931  | 0.008   | 0.08845 | 0.27252 | 0.11921 |
| Y | 191CIJ94 | 0.09777 | 0.41329 | 3.8653   | 0.07288 | 0.09684 | 0.4983  | 0.03283 |
| Y | 191CIJ95 | 0.06533 | 0.13551 | 0.81476  | 0.02615 | 0.2226  | 1.04674 | 0.01271 |
| Y | 191CIJ96 | 0.05453 | 0.02735 | 0.14589  | 0.00584 | 0.14642 | 0.6225  | 0.01664 |
|   | 191CIJ97 | 0.05126 | 0.03876 | 0.28307  | 0.01119 | 0.13042 | 0.40979 | 0.08083 |
| Y | 191CIJ98 | 0.06031 | 0.13311 | 0.75476  | 0.02578 | 0.22742 | 1.06502 | 0.02946 |
|   | 191CIJ99 | 0.04859 | 0.01247 | 0.08286  | 0.00234 | 0.36265 | 1.75325 | 0.09475 |
|   | 91CIJ100 | 0.05037 | 0.03499 | 0.24139  | 0.00965 | 0.07718 | 0.25345 | 0.14301 |
| Y | 91CIJ101 | 0.0548  | 0.08767 | 0.46445  | 0.01623 | 0.40769 | 1.99381 | 0.02524 |
|   | 91CIJ102 | 0.04997 | 0.0283  | 0.19688  | 0.00767 | 0.16618 | 0.55479 | 0.10634 |
|   | 91CIJ103 | 0.13163 | 0.00844 | 0.10606  | 0.00291 | 0.2888  | 0.75715 | 0.00944 |
| Y | 91CIJ104 | 0.06543 | 0.14345 | 0.892    | 0.02772 | 0.15918 | 0.74488 | 0.01376 |
| Y | 91CIJ105 | 0.07343 | 0.27019 | 1.87975  | 0.04908 | 0.1771  | 0.88126 | 0.02272 |
|   | 91CIJ106 | 0.05364 | 0.03612 | 0.25898  | 0.01293 | 0.03539 | 0.08931 | 0.16514 |
|   | 91CIJ107 | 0.06219 | 0.01943 | 0.11366  | 0.004   | 0.22997 | 1.01014 | 0.01896 |
|   | 91CIJ108 | 0.05079 | 0.03449 | 0.23891  | 0.01004 | 0.15318 | 0.47489 | 0.07846 |
|   | 91CIJ109 | 0.06755 | 0.15283 | 1.41732  | 0.04202 | 0.05003 | 0.16416 | 0.07494 |
|   | 91CIJ110 | 0.07733 | 0.20122 | 2.13205  | 0.05417 | 0.11678 | 0.39123 | 0.07937 |
| Y | 91CIJ111 | 0.20092 | 0.69286 | 13.10816 | 0.11429 | 0.07919 | 0.43268 | 0.02661 |
|   | 91CIJ112 | 0.07003 | 0.15417 | 1.50765  | 0.04236 | 0.0861  | 0.28225 | 0.13711 |
|   | 91CIJ113 | 0.05432 | 0.03513 | 0.26132  | 0.01035 | 0.10511 | 0.32119 | 0.08399 |
| Y | 91CIJ114 | 0.04786 | 0.02786 | 0.13252  | 0.00538 | 0.16946 | 0.78981 | 0.03412 |
|   | 91CIJ115 | 0.05434 | 0.01167 | 0.06254  | 0.0023  | 0.30701 | 1.39801 | 0.01007 |
|   | 91CIJ116 | 0.05674 | 0.13437 | 0.71746  | 0.02473 | 0.2907  | 1.4194  | 0.02168 |
| Y | 91CIJ117 | 0.04847 | 0.03511 | 0.23424  | 0.00687 | 0.1999  | 0.9175  | 0.14034 |
|   | 91CIJ118 | 0.04784 | 0.01669 | 0.11083  | 0.00467 | 0.16731 | 0.53639 | 0.09119 |
| Y | 91CIJ119 | 0.06705 | 0.17372 | 1.52192  | 0.04256 | 0.09896 | 0.36225 | 0.04726 |
| Y | 91CIJ120 | 0.13306 | 0.49514 | 9.16762  | 0.10275 | 0.05798 | 0.25037 | 0.10359 |

here. NIST SRM 612 silicate glass (Pearce et al., 1997) was not used as an external standard during the analysis. The samples were analysed in the lab (UCL) in 2006 when these samples were analysed. As a consequence U and Pb

GLITTER!: Isotopic ratios: 1 sigma uncertainty.

| Pb207/Pb2 | Pb206/U23 | Pb207/U23 | Pb208/Th2 | Pb208/Pb2 | Th232/U23 | U238/Si29 |
|-----------|-----------|-----------|-----------|-----------|-----------|-----------|
| 0.00126   | 0.00212   | 0.04499   | 0.00066   | 0.0057    | 0.01631   | 0.00002   |
| 0.00088   | 0.00114   | 0.01476   | 0.00042   | 0.00098   | 0.00257   | 0.00005   |
| 0.0013    | 0.00369   | 0.07642   | 0.00106   | 0.0018    | 0.00591   | 0.00007   |
| 0.0008    | 0.00058   | 0.00656   | 0.00018   | 0.00239   | 0.00703   | 0.0001    |
| 0.00121   | 0.00249   | 0.05187   | 0.00071   | 0.00309   | 0.01002   | 0.00003   |
| 0.00091   | 0.00169   | 0.02335   | 0.00051   | 0.00136   | 0.00431   | 0.00006   |
| 0.0196    | 0.00112   | 0.32056   | 0.00159   | 0.03775   | 0.01232   | 0.00002   |
| 0.0173    | 0.00111   | 0.26263   | 0.00046   | 0.03512   | 0.03996   | 0.00001   |
| 0.00245   | 0.00019   | 0.00465   | 0.0001    | 0.0052    | 0.00696   | 0.00005   |
| 0.0009    | 0.00144   | 0.01919   | 0.00045   | 0.00193   | 0.00583   | 0.00005   |
| 0.00239   | 0.0002    | 0.00474   | 0.00009   | 0.006     | 0.00924   | 0.00003   |
| 0.0009    | 0.00016   | 0.00183   | 0.00007   | 0.0015    | 0.00319   | 0.00017   |
| 0.00081   | 0.00118   | 0.01417   | 0.0004    | 0.00091   | 0.00258   | 0.00009   |
| 0.00124   | 0.00349   | 0.06954   | 0.00102   | 0.00167   | 0.0054    | 0.00006   |
| 0.00305   | 0.00016   | 0.00388   | 0.00008   | 0.00772   | 0.00906   | 0.00005   |
| 0.00243   | 0.00013   | 0.00308   | 0.00008   | 0.0053    | 0.00614   | 0.0001    |
| 0.00083   | 0.00101   | 0.01224   | 0.0004    | 0.0008    | 0.00195   | 0.00012   |
| 0.00114   | 0.00187   | 0.03384   | 0.00066   | 0.00203   | 0.00544   | 0.00004   |
| 0.00099   | 0.00217   | 0.03381   | 0.00068   | 0.00269   | 0.00806   | 0.00006   |
| 0.00263   | 0.00021   | 0.00499   | 0.00011   | 0.0056    | 0.00712   | 0.00004   |
| 0.00234   | 0.0002    | 0.00445   | 0.00011   | 0.00451   | 0.00563   | 0.00008   |
| 0.01205   | 0.00091   | 0.18727   | 0.00329   | 0.02526   | 0.00517   | 0.00001   |
| 0.00152   | 0.00027   | 0.00499   | 0.00011   | 0.00442   | 0.00906   | 0.00005   |
| 0.00101   | 0.00016   | 0.00205   | 0.00007   | 0.00234   | 0.00512   | 0.00013   |
| 0.0065    | 0.00028   | 0.01665   | 0.0002    | 0.01452   | 0.01162   | 0.00004   |
| 0.00108   | 0.00272   | 0.04541   | 0.00091   | 0.00096   | 0.00276   | 0.00005   |
| 0.00087   | 0.00109   | 0.01353   | 0.00039   | 0.00166   | 0.00439   | 0.00005   |
| 0.00102   | 0.00113   | 0.01652   | 0.00037   | 0.00536   | 0.0149    | 0.00003   |
| 0.0017    | 0.00019   | 0.00364   | 0.00008   | 0.00431   | 0.00773   | 0.00017   |
| 0.001     | 0.00231   | 0.03479   | 0.0007    | 0.00264   | 0.00831   | 0.00005   |
| 0.00131   | 0.00308   | 0.06177   | 0.00104   | 0.00245   | 0.00697   | 0.00009   |
| 0.00093   | 0.00091   | 0.01171   | 0.00037   | 0.00148   | 0.00342   | 0.00005   |
| 0.00108   | 0.00234   | 0.0396    | 0.00083   | 0.00157   | 0.00424   | 0.00005   |
| 0.00099   | 0.00103   | 0.01422   | 0.00035   | 0.00545   | 0.01483   | 0.00004   |
| 0.00138   | 0.00058   | 0.00962   | 0.00023   | 0.00413   | 0.00867   | 0.00005   |
| 0.00199   | 0.00356   | 0.10709   | 0.0012    | 0.00174   | 0.00503   | 0.00019   |
| 0.00137   | 0.00123   | 0.02377   | 0.00053   | 0.00325   | 0.00678   | 0.00003   |
| 0.01118   | 0.0018    | 0.39984   | 0.00077   | 0.0255    | 0.04831   | 0.00001   |
| 0.00096   | 0.00114   | 0.01529   | 0.00041   | 0.00298   | 0.00784   | 0.00004   |

|         |          |         |         |         |         |         |
|---------|----------|---------|---------|---------|---------|---------|
| 0.00219 | 0.00015  | 0.00327 | 0.00006 | 0.0075  | 0.01279 | 0.00006 |
| 0.00097 | 0.00215  | 0.03177 | 0.00076 | 0.00132 | 0.00363 | 0.00012 |
| 0.0014  | 0.00252  | 0.0584  | 0.00086 | 0.00458 | 0.01234 | 0.00002 |
| 0.00091 | 0.00201  | 0.02668 | 0.00063 | 0.00166 | 0.00512 | 0.00012 |
| 0.00114 | 0.00115  | 0.01821 | 0.00047 | 0.00214 | 0.00488 | 0.00003 |
| 0.00106 | 0.00017  | 0.0021  | 0.00006 | 0.00386 | 0.00911 | 0.00015 |
| 0.01807 | 18.95825 | 6.9027  | -NaN    | 0.02582 | -NaN    | 0       |
| 0.0012  | 0.00136  | 0.03564 | 0.0006  | 0.00154 | 0.00441 | 0.00001 |
| 0.00163 | 0.00356  | 0.14743 | 0.00085 | 0.00164 | 0.00737 | 0.00004 |
| 0.00078 | 0.00083  | 0.01227 | 0.00025 | 0.00185 | 0.00654 | 0.00007 |
| 0.00244 | 0.00013  | 0.00355 | 0.00007 | 0.00546 | 0.00837 | 0.00006 |
| 0.00108 | 0.00074  | 0.01575 | 0.00031 | 0.00196 | 0.00544 | 0.00003 |
| 0.00144 | 0.00057  | 0.01391 | 0.0003  | 0.00265 | 0.00562 | 0.00004 |
| 0.00376 | 0.0002   | 0.00817 | 0.00017 | 0.00613 | 0.00558 | 0.00004 |
| 0.00073 | 0.0007   | 0.00911 | 0.00023 | 0.0011  | 0.00379 | 0.00008 |
| 0.00459 | 0.00057  | 0.04323 | 0.0008  | 0.0073  | 0.00471 | 0.00002 |
| 0.01196 | 0.00053  | 0.11692 | 0.00298 | 0.02149 | 0.00308 | 0.00002 |
| 0.00105 | 0.00092  | 0.01944 | 0.00042 | 0.00143 | 0.00392 | 0.00005 |
| 0.00182 | 0.00015  | 0.00352 | 0.00008 | 0.00382 | 0.00689 | 0.00005 |
| 0.00198 | 0.00017  | 0.00413 | 0.00009 | 0.00398 | 0.00732 | 0.00005 |
| 0.00364 | 0.0003   | 0.01381 | 0.00019 | 0.00709 | 0.00911 | 0.00002 |
| 0.00129 | 0.00015  | 0.00302 | 0.00007 | 0.00285 | 0.00676 | 0.00011 |
| 0.00069 | 0.00041  | 0.00474 | 0.00012 | 0.00204 | 0.00712 | 0.00015 |
| 0.00224 | 0.00017  | 0.00471 | 0.00009 | 0.0047  | 0.00782 | 0.00005 |
| 0.00143 | 0.00162  | 0.05842 | 0.00047 | 0.0048  | 0.01695 | 0.00002 |
| 0.00112 | 0.00129  | 0.03214 | 0.00058 | 0.0012  | 0.00342 | 0.00003 |
| 0.00079 | 0.00032  | 0.00433 | 0.00012 | 0.0016  | 0.00497 | 0.0001  |
| 0.00132 | 0.00271  | 0.07948 | 0.00076 | 0.00135 | 0.00529 | 0.00006 |
| 0.00119 | 0.00012  | 0.00223 | 0.00006 | 0.00248 | 0.00585 | 0.0001  |
| 0.00122 | 0.00175  | 0.0508  | 0.00065 | 0.00209 | 0.00677 | 0.00004 |
| 0.00066 | 0.00068  | 0.00746 | 0.00029 | 0.0003  | 0.00088 | 0.00023 |
| 0.00103 | 0.00012  | 0.00188 | 0.00004 | 0.00355 | 0.01077 | 0.00014 |
| 0.00086 | 0.00066  | 0.01082 | 0.00027 | 0.00114 | 0.0034  | 0.0001  |
| 0.00079 | 0.00129  | 0.01848 | 0.0004  | 0.00069 | 0.00253 | 0.00029 |
| 0.00209 | 0.00015  | 0.00476 | 0.0001  | 0.00427 | 0.00698 | 0.00011 |
| 0.01191 | 0.0023   | 1.09658 | 0.00998 | 0.02186 | 0.00551 | 0.00001 |
| 0.00072 | 0.00035  | 0.0042  | 0.00016 | 0.0007  | 0.00191 | 0.00017 |
| 0.00142 | 0.00033  | 0.00735 | 0.00015 | 0.0033  | 0.00794 | 0.00004 |
| 0.00193 | 0.00016  | 0.0041  | 0.00008 | 0.00497 | 0.01027 | 0.00004 |
| 0.00224 | 0.00012  | 0.00328 | 0.00009 | 0.00372 | 0.00514 | 0.00007 |

GLITTER!: Isotopic ratios: 1 sigma uncertainty.

| Pb207/Pb2 | Pb206/U23 | Pb207/U23 | Pb208/Th2 | Pb208/Pb2 | Th232/U23 | U238/Si29 |
|-----------|-----------|-----------|-----------|-----------|-----------|-----------|
| 0.00783   | 0.03721   | 12.50449  | 0.02151   | 0.01406   | 0.03932   | 0         |
| 0.00166   | 0.00087   | 0.01174   | 0.00036   | 0.0026    | 0.00675   | 0.00002   |
| 0.00138   | 0.00036   | 0.00372   | 0.0001    | 0.00292   | 0.0114    | 0.00007   |

|         |         |         |         |         |         |         |
|---------|---------|---------|---------|---------|---------|---------|
| 0.00058 | 0.00497 | 0.07481 | 0.00051 | 0.00134 | 0.01746 | 0.00005 |
| 0.00055 | 0.00047 | 0.00368 | 0.00009 | 0.00165 | 0.01149 | 0.00012 |
| 0.00189 | 0.00028 | 0.00315 | 0.00008 | 0.00515 | 0.01598 | 0.00004 |
| 0.00129 | 0.00012 | 0.00136 | 0.00004 | 0.00322 | 0.01036 | 0.00012 |
| 0.00058 | 0.00745 | 0.10909 | 0.00039 | 0.00005 | 0.00127 | 0.00042 |
| 0.00044 | 0.00087 | 0.0081  | 0.00016 | 0.0022  | 0.01511 | 0.00016 |
| 0.00065 | 0.00038 | 0.00366 | 0.00016 | 0.00074 | 0.00237 | 0.00014 |
| 0.0004  | 0.00101 | 0.00875 | 0.00022 | 0.00073 | 0.00458 | 0.00014 |
| 0.00124 | 0.0001  | 0.00127 | 0.00003 | 0.0033  | 0.01067 | 0.00045 |
| 0.00067 | 0.00007 | 0.0006  | 0.00001 | 0.00481 | 0.04369 | 0.00047 |
| 0.00132 | 0.00022 | 0.00207 | 0.00005 | 0.00478 | 0.02152 | 0.00007 |
| 0.00202 | 0.0002  | 0.00231 | 0.00007 | 0.00408 | 0.01103 | 0.00004 |
| 0.00199 | 0.00018 | 0.00216 | 0.00005 | 0.0044  | 0.01293 | 0.00005 |
| 0.00107 | 0.0001  | 0.00114 | 0.00003 | 0.00378 | 0.01466 | 0.00015 |
| 0.00082 | 0.00062 | 0.00519 | 0.00011 | 0.00278 | 0.01778 | 0.00005 |
| 0.00212 | 0.00432 | 0.1751  | 0.00087 | 0.00684 | 0.03177 | 0.00002 |
| 0.0008  | 0.00142 | 0.01777 | 0.00042 | 0.00142 | 0.00626 | 0.00011 |
| 0.00132 | 0.00011 | 0.00147 | 0.00005 | 0.00339 | 0.00868 | 0.00015 |
| 0.00215 | 0.00016 | 0.00191 | 0.00006 | 0.00496 | 0.01206 | 0.00005 |
| 0.0019  | 0.00017 | 0.00193 | 0.00006 | 0.0043  | 0.01169 | 0.00005 |
| 0.00204 | 0.00015 | 0.00177 | 0.00006 | 0.00441 | 0.01014 | 0.00005 |
| 0.001   | 0.00025 | 0.00197 | 0.00006 | 0.00299 | 0.01401 | 0.00007 |
| 0.00276 | 0.00022 | 0.00297 | 0.00009 | 0.00592 | 0.01154 | 0.00004 |
| 0.0006  | 0.00371 | 0.04358 | 0.00073 | 0.00207 | 0.01488 | 0.00008 |
| 0.0009  | 0.00032 | 0.00234 | 0.00008 | 0.00264 | 0.01246 | 0.00008 |
| 0.00067 | 0.00047 | 0.00457 | 0.00014 | 0.00241 | 0.01049 | 0.00014 |
| 0.00102 | 0.00313 | 0.05546 | 0.00072 | 0.00095 | 0.00597 | 0.00007 |
| 0.0016  | 0.00086 | 0.01267 | 0.0003  | 0.00368 | 0.01097 | 0.00002 |
| 0.00113 | 0.00078 | 0.00784 | 0.00021 | 0.00291 | 0.01201 | 0.00003 |
| 0.00058 | 0.00035 | 0.00315 | 0.00057 | 0.0007  | 0.00061 | 0.00026 |
| 0.00366 | 0.00024 | 0.00367 | 0.0001  | 0.00762 | 0.01187 | 0.00003 |
| 0.00116 | 0.00058 | 0.00735 | 0.00029 | 0.00198 | 0.00477 | 0.00009 |
| 0.00045 | 0.00038 | 0.00278 | 0.00009 | 0.00223 | 0.01323 | 0.0004  |
| 0.00055 | 0.0014  | 0.00996 | 0.00031 | 0.00231 | 0.01488 | 0.00009 |
| 0.00294 | 0.00018 | 0.00252 | 0.00009 | 0.00553 | 0.00857 | 0.00004 |
| 0.00113 | 0.00789 | 0.16209 | 0.00097 | 0.00167 | 0.02019 | 0.00006 |
| 0.00109 | 0.00013 | 0.00161 | 0.00006 | 0.00337 | 0.00838 | 0.00021 |
| 0.0008  | 0.00038 | 0.00406 | 0.00021 | 0.00147 | 0.00363 | 0.00013 |
| 0.00279 | 0.00019 | 0.00246 | 0.00007 | 0.00742 | 0.01517 | 0.00004 |
| 0.002   | 0.00016 | 0.00183 | 0.00006 | 0.0047  | 0.01153 | 0.00005 |
| 0.00081 | 0.00073 | 0.00603 | 0.0002  | 0.00326 | 0.01595 | 0.00005 |
| 0.00057 | 0.00089 | 0.00861 | 0.00032 | 0.00266 | 0.01073 | 0.00014 |
| 0.00112 | 0.00078 | 0.00797 | 0.00025 | 0.00324 | 0.01236 | 0.00003 |
| 0.00238 | 0.00017 | 0.00214 | 0.00007 | 0.00649 | 0.01387 | 0.00005 |
| 0.00062 | 0.00054 | 0.00481 | 0.00015 | 0.00389 | 0.01962 | 0.00013 |
| 0.00068 | 0.00224 | 0.03096 | 0.00092 | 0.00275 | 0.01015 | 0.00015 |
| 0.00141 | 0.00016 | 0.00172 | 0.00006 | 0.00544 | 0.01742 | 0.00009 |
| 0.00179 | 0.00042 | 0.00536 | 0.00017 | 0.00457 | 0.01146 | 0.00006 |
| 0.00371 | 0.00029 | 0.00403 | 0.00014 | 0.00779 | 0.01022 | 0.00005 |
| 0.00063 | 0.00043 | 0.00405 | 0.00021 | 0.00122 | 0.00344 | 0.00018 |
| 0.00191 | 0.00101 | 0.01557 | 0.00057 | 0.00316 | 0.00563 | 0.00002 |



|         |         |          |         |         |         |         |
|---------|---------|----------|---------|---------|---------|---------|
| 0.00129 | 0.00012 | 0.00155  | 0.00006 | 0.00377 | 0.00759 | 0.00023 |
| 0.0021  | 0.00016 | 0.00203  | 0.00008 | 0.00497 | 0.00871 | 0.00011 |
| 0.00398 | 0.00027 | 0.00414  | 0.00015 | 0.01002 | 0.01058 | 0.00004 |
| 0.001   | 0.0025  | 0.0505   | 0.0015  | 0.00208 | 0.00536 | 0.00017 |
| 0.00111 | 0.00087 | 0.00886  | 0.00032 | 0.00293 | 0.01005 | 0.00003 |
| 0.00087 | 0.00347 | 0.05896  | 0.00155 | 0.00201 | 0.00703 | 0.00028 |
| 0.0011  | 0.00074 | 0.00746  | 0.00026 | 0.00372 | 0.01297 | 0.00004 |
| 0.00144 | 0.00069 | 0.01061  | 0.0003  | 0.00383 | 0.01015 | 0.00011 |
| 0.00231 | 0.00024 | 0.00309  | 0.0001  | 0.00661 | 0.01425 | 0.00005 |
| 0.001   | 0.00181 | 0.02071  | 0.00065 | 0.00229 | 0.00855 | 0.00003 |
| 0.01312 | 0.15863 | 158.8787 | 0.1366  | 0.03034 | 0.06266 | 0       |
| 0.00088 | 0.00311 | 0.03967  | 0.0004  | 0.00155 | 0.0176  | 0.00009 |

GLITTER!: Isotopic ratios: 1 sigma uncertainty.

| Analysis_# | Pb207/Pb2 | Pb206/U23 | Pb207/U23 | Pb208/Th2 | Pb208/Pb206 | Rho      |
|------------|-----------|-----------|-----------|-----------|-------------|----------|
| CIL1       | 0.00298   | 0.0036    | 0.05237   | 0.00387   | 0.01823     | 0.076865 |
| CIL2       | 0.00101   | 0.0019    | 0.01618   | 0.0027    | 0.00175     | 0.131876 |
| CIL3       | 0.00421   | 0.01028   | 0.36809   | 0.00985   | 0.00628     | 0.029689 |
| CIL4       | 0.00179   | 0.00316   | 0.04108   | 0.00397   | 0.0083      | 0.086212 |
| CIL5       | 0.00983   | 0.00267   | 0.04475   | 0.01492   | 0.02942     | 0.059373 |
| CIL6       | 0.00407   | 0.0089    | 0.15501   | 0.00653   | 0.02861     | 0.060365 |
| CIL7       | 0.02889   | 0.00028   | 0.00889   | 0.0004    | 0.08344     | 0.033784 |
| CIL8       | 0.00163   | 0.00072   | 0.00747   | 0.00112   | 0.00651     | 0.108659 |
| CIL9       | 0.02206   | 0.00034   | 0.00772   | 0.00047   | 0.10287     | 0.051601 |
| CIL10      | 0.00205   | 0.00191   | 0.02183   | 0.00181   | 0.01986     | 0.09668  |
| CIL11      | 0.00151   | 0.0021    | 0.02278   | 0.00369   | 0.00474     | 0.102073 |
| CIL12      | 0.02219   | 0.00025   | 0.00639   | 0.0004    | 0.10054     | 0.040449 |
| CIL13      | 0.00369   | 0.00169   | 0.02502   | 0.00198   | 0.0191      | 0.073296 |
| CIL14      | 0.00311   | 0.00717   | 0.15051   | 0.0068    | 0.01112     | 0.048205 |
| CIL15      | 0.00247   | 0.00676   | 0.14015   | 0.0071    | 0.00684     | 0.049133 |
| CIL16      | 0.00191   | 0.00071   | 0.0078    | 0.00113   | 0.0054      | 0.103506 |
| CIL17      | 0.00164   | 0.00171   | 0.01832   | 0.00221   | 0.00732     | 0.090531 |
| CIL18      | 0.00292   | 0.00776   | 0.17811   | 0.008     | 0.00793     | 0.043352 |
| CIL19      | 0.00243   | 0.00412   | 0.05774   | 0.0037    | 0.01567     | 0.075194 |
| CIL20      | 0.0013    | 0.00141   | 0.01338   | 0.00192   | 0.00524     | 0.116751 |
| CIL21      | 0.00159   | 0.00068   | 0.00687   | 0.00102   | 0.00588     | 0.100543 |
| CIL22      | 0.00261   | 0.00278   | 0.03595   | 0.00289   | 0.01577     | 0.086088 |
| CIL23      | 0.0022    | 0.00089   | 0.01075   | 0.00101   | 0.0125      | 0.094641 |
| CIL24      | 0.00273   | 0.00092   | 0.01129   | 0.00113   | 0.01363     | 0.087221 |
| CIL25      | 0.00237   | 0.00371   | 0.05009   | 0.00381   | 0.01506     | 0.081459 |
| CIL26      | 0.00226   | 0.00198   | 0.03505   | 0.00539   | 0.00351     | 0.054259 |
| CIL27      | 0.00296   | 0.00521   | 0.12378   | 0.005     | 0.00332     | 0.041206 |
| CIL28      | 0.00208   | 0.00539   | 0.08752   | 0.00626   | 0.00551     | 0.061107 |
| CIL29      | 0.01284   | 0.00028   | 0.00765   | 0.00049   | 0.04342     | 0.034277 |
| CIL30      | 0.00306   | 0.00756   | 0.16649   | 0.00799   | 0.00826     | 0.044475 |
| CIL31      | 0.00181   | 0.00187   | 0.02112   | 0.00205   | 0.01912     | 0.097215 |

|       |         |         |         |         |         |          |
|-------|---------|---------|---------|---------|---------|----------|
| CIL32 | 0.00258 | 0.00429 | 0.06164 | 0.00428 | 0.02519 | 0.074771 |
| CIL33 | 0.00317 | 0.00526 | 0.13005 | 0.00578 | 0.00285 | 0.039503 |
| CIL34 | 0.00322 | 0.00475 | 0.07617 | 0.00457 | 0.03135 | 0.067905 |
| CIL35 | 0.00191 | 0.00421 | 0.06149 | 0.004   | 0.00294 | 0.068406 |
| CIL36 | 0.00155 | 0.00296 | 0.03382 | 0.00362 | 0.00501 | 0.089259 |
| CIL37 | 0.00172 | 0.00281 | 0.03415 | 0.00308 | 0.00181 | 0.085117 |
| CIL38 | 0.00229 | 0.00429 | 0.05801 | 0.00451 | 0.01874 | 0.079739 |
| CIL39 | 0.00227 | 0.0023  | 0.02872 | 0.00249 | 0.01514 | 0.089254 |
| CIL40 | 0.00187 | 0.0044  | 0.06137 | 0.0055  | 0.00667 | 0.07232  |
| CIL41 | 0.00164 | 0.00133 | 0.01407 | 0.00228 | 0.00828 | 0.100221 |
| CIL42 | 0.00241 | 0.00454 | 0.0693  | 0.00601 | 0.0114  | 0.068279 |
| CIL43 | 0.00201 | 0.0023  | 0.02775 | 0.00395 | 0.00525 | 0.090941 |
| CIL44 | 0.00412 | 0.00138 | 0.01916 | 0.0015  | 0.02185 | 0.084656 |
| CIL45 | 0.00266 | 0.00465 | 0.06402 | 0.00501 | 0.01928 | 0.080037 |
| CIL46 | 0.0034  | 0.00866 | 0.21973 | 0.01043 | 0.01073 | 0.040048 |
| CIL47 | 0.00151 | 0.0002  | 0.00193 | 0.00094 | 0.00846 | 0.117647 |
| CIL48 | 0.00236 | 0.00095 | 0.01087 | 0.00099 | 0.0204  | 0.10664  |
| CIL49 | 0.00283 | 0.00492 | 0.07362 | 0.00588 | 0.01107 | 0.073469 |
| CIL50 | 0.01201 | 0.00013 | 0.00269 | 0.00015 | 0.05088 | 0.057292 |
| CIL51 | 0.00188 | 0.00088 | 0.00914 | 0.00114 | 0.01105 | 0.115426 |
| CIL52 | 0.00243 | 0.00213 | 0.02792 | 0.00264 | 0.04751 | 0.094545 |
| CIL53 | 0.00389 | 0.00725 | 0.18913 | 0.00939 | 0.01434 | 0.040261 |
| CIL54 | 0.00301 | 0.00682 | 0.12392 | 0.00836 | 0.01424 | 0.059    |
| CIL55 | 0.00375 | 0.00121 | 0.01737 | 0.00142 | 0.01746 | 0.087883 |
| CIL56 | 0.00167 | 0.00194 | 0.02067 | 0.0026  | 0.01081 | 0.104785 |
| CIL57 | 0.00251 | 0.00087 | 0.00978 | 0.00108 | 0.01223 | 0.109795 |
| CIL58 | 0.00183 | 0.00024 | 0.00285 | 0.00141 | 0.01217 | 0.091667 |
| CIL59 | 0.00733 | 0.00013 | 0.00223 | 0.00011 | 0.03505 | 0.075    |
| CIL60 | 0.00376 | 0.00786 | 0.17758 | 0.01086 | 0.01213 | 0.047665 |
| CIL61 | 0.00316 | 0.0019  | 0.03235 | 0.00205 | 0.01461 | 0.057836 |
| CIL62 | 0.00317 | 0.00127 | 0.02239 | 0.00093 | 0.0108  | 0.05019  |
| CIL63 | 0.00257 | 0.0011  | 0.01686 | 0.00084 | 0.00704 | 0.067211 |
| CIL64 | 0.0022  | 0.00067 | 0.00967 | 0.00038 | 0.01156 | 0.064123 |
| CIL65 | 0.00177 | 0.00146 | 0.01937 | 0.00083 | 0.01093 | 0.063732 |
| CIL66 | 0.00309 | 0.00552 | 0.1107  | 0.00329 | 0.00769 | 0.050805 |
| CIL67 | 0.00148 | 0.00007 | 0.00082 | 0.00018 | 0.00253 | 0.072165 |
| CIL68 | 0.00238 | 0.00534 | 0.09797 | 0.00331 | 0.00545 | 0.054272 |
| CIL69 | 0.00525 | 0.0028  | 0.05271 | 0.0014  | 0.02425 | 0.053306 |
| CIL70 | 0.00266 | 0.00575 | 0.13129 | 0.00301 | 0.00366 | 0.04437  |
| CIL71 | 0.00222 | 0.0013  | 0.01954 | 0.00086 | 0.00708 | 0.061331 |
| CIL72 | 0.00526 | 0.00143 | 0.02684 | 0.00082 | 0.01831 | 0.053557 |
| CIL73 | 0.0019  | 0.00163 | 0.02218 | 0.00135 | 0.00351 | 0.056367 |
| CIL74 | 0.00251 | 0.00443 | 0.07953 | 0.00303 | 0.00708 | 0.055212 |
| CIL75 | 0.00183 | 0.00233 | 0.03262 | 0.00186 | 0.00401 | 0.059757 |
| CIL76 | 0.01489 | 0.00093 | 0.03521 | 0.00084 | 0.04013 | 0.024641 |
| CIL77 | 0.00286 | 0.00399 | 0.06981 | 0.00227 | 0.01191 | 0.052924 |
| CIL78 | 0.00182 | 0.00208 | 0.02763 | 0.00199 | 0.00157 | 0.070175 |
| CIL79 | 0.00283 | 0.00522 | 0.12026 | 0.00378 | 0.00302 | 0.043181 |
| CIL80 | 0.00253 | 0.00196 | 0.02882 | 0.00238 | 0.00267 | 0.070076 |
| CIL81 | 0.01127 | 0.00052 | 0.011   | 0.00026 | 0.03763 | 0.045419 |
| CIL82 | 0.00149 | 0.00235 | 0.02887 | 0.0019  | 0.00143 | 0.081967 |

|       |         |         |         |         |         |          |
|-------|---------|---------|---------|---------|---------|----------|
| CIL83 | 0.00229 | 0.00306 | 0.04751 | 0.00222 | 0.00522 | 0.059507 |
| CIL84 | 0.00185 | 0.00264 | 0.03687 | 0.00225 | 0.00277 | 0.073143 |
| CIL85 | 0.00252 | 0.00328 | 0.05128 | 0.00254 | 0.00496 | 0.067709 |
| CIL86 | 0.00163 | 0.00225 | 0.02809 | 0.00173 | 0.00398 | 0.078156 |
| CIL87 | 0.00438 | 0.0036  | 0.06306 | 0.00218 | 0.01257 | 0.058454 |
| CIL88 | 0.00211 | 0.00376 | 0.05444 | 0.00258 | 0.00623 | 0.069027 |
| CIL89 | 0.0054  | 0.00055 | 0.01093 | 0.0004  | 0.01706 | 0.050847 |
| CIL90 | 0.0019  | 0.00269 | 0.03634 | 0.00198 | 0.00581 | 0.075082 |

GLITTER!: Isotopic ratios: 1 sigma uncertainty.

| Analysis_# | Pb207/Pb2 | Pb206/U23 | Pb207/U23 | Pb208/Th2 | Pb208/Pb206 | Rho      |
|------------|-----------|-----------|-----------|-----------|-------------|----------|
| BAY1       | 0.00595   | 0.0006    | 0.01081   | 0.00037   | 0.02454     | 0.05619  |
| BAY2       | 0.02504   | 0.0007    | 0.03102   | 0.00063   | 0.06062     | 0.022514 |
| BAY3       | 0.00234   | 0.00325   | 0.04897   | 0.00217   | 0.0107      | 0.066119 |
| BAY4       | 0.01065   | 0.00069   | 0.01938   | 0.00065   | 0.03064     | 0.035346 |
| BAY5       | 0.00414   | 0.00513   | 0.14789   | 0.0024    | 0.01354     | 0.034554 |
| BAY6       | 0.00467   | 0.00148   | 0.02483   | 0.00095   | 0.01142     | 0.059429 |
| BAY7       | 0.00502   | 0.00057   | 0.01012   | 0.0003    | 0.01649     | 0.055233 |
| BAY8       | 0.00848   | 0.00099   | 0.02711   | 0.00132   | 0.02011     | 0.045545 |
| BAY9       | 0.00331   | 0.00048   | 0.00689   | 0.00028   | 0.01344     | 0.069007 |
| BAY10      | 0.00198   | 0.00309   | 0.04203   | 0.00255   | 0.00145     | 0.073335 |
| BAY11      | 0.00178   | 0.00067   | 0.00743   | 0.0005    | 0.00912     | 0.089378 |
| BAY12      | 0.00537   | 0.00047   | 0.00836   | 0.00027   | 0.01409     | 0.055819 |
| BAY13      | 0.0017    | 0.00065   | 0.0076    | 0.00059   | 0.00691     | 0.086162 |
| BAY14      | 0.00169   | 0.00068   | 0.00779   | 0.00053   | 0.00924     | 0.086624 |
| BAY15      | 0.00118   | 0.00055   | 0.00536   | 0.00043   | 0.00665     | 0.101852 |
| BAY16      | 0.00169   | 0.00059   | 0.00694   | 0.0006    | 0.00632     | 0.085714 |
| BAY17      | 0.00257   | 0.00048   | 0.00636   | 0.00036   | 0.01554     | 0.074883 |
| BAY18      | 0.00387   | 0.00045   | 0.00663   | 0.00032   | 0.02413     | 0.067265 |
| BAY19      | 0.00132   | 0.00271   | 0.03093   | 0.00188   | 0.00591     | 0.087821 |
| BAY20      | 0.00419   | 0.00046   | 0.00844   | 0.00043   | 0.01814     | 0.054054 |
| BAY21      | 0.00246   | 0.00037   | 0.00493   | 0.00038   | 0.0108      | 0.074447 |
| BAY22      | 0.00198   | 0.00075   | 0.00943   | 0.00067   | 0.00764     | 0.079916 |
| BAY23      | 0.00188   | 0.0015    | 0.01919   | 0.001     | 0.01432     | 0.078036 |
| BAY24      | 0.00165   | 0.00057   | 0.00646   | 0.0005    | 0.00862     | 0.089094 |
| BAY25      | 0.00897   | 0.00033   | 0.0065    | 0.00039   | 0.03921     | 0.050382 |
| BAY26      | 0.00681   | 0.00077   | 0.01318   | 0.00068   | 0.03611     | 0.057938 |
| BAY27      | 0.00086   | 0.00056   | 0.00444   | 0.00046   | 0.00468     | 0.12528  |
| BAY28      | 0.00354   | 0.00048   | 0.00692   | 0.00039   | 0.02121     | 0.068768 |
| BAY29      | 0.00334   | 0.00042   | 0.00623   | 0.00031   | 0.02155     | 0.066879 |
| BAY30      | 0.00165   | 0.00141   | 0.01647   | 0.00164   | 0.00483     | 0.085542 |
| BAY31      | 0.00198   | 0.0006    | 0.00728   | 0.00066   | 0.00761     | 0.081744 |
| BAY32      | 0.00123   | 0.0007    | 0.00687   | 0.00065   | 0.00602     | 0.10101  |
| BAY33      | 0.00142   | 0.00053   | 0.00564   | 0.00051   | 0.00686     | 0.094903 |
| BAY34      | 0.00486   | 0.00091   | 0.01442   | 0.00091   | 0.02323     | 0.063274 |
| BAY35      | 0.00231   | 0.00177   | 0.02325   | 0.001     | 0.03137     | 0.076365 |
| BAY36      | 0.00194   | 0.00034   | 0.00425   | 0.00031   | 0.01017     | 0.081585 |

|       |         |         |         |         |         |          |
|-------|---------|---------|---------|---------|---------|----------|
| BAY37 | 0.0131  | 0.00039 | 0.00837 | 0.00037 | 0.07575 | 0.046209 |
| BAY38 | 0.00589 | 0.00076 | 0.01201 | 0.00069 | 0.03058 | 0.063636 |
| BAY39 | 0.00123 | 0.00246 | 0.02715 | 0.00239 | 0.00476 | 0.090511 |
| BAY40 | 0.00149 | 0.0016  | 0.01789 | 0.00151 | 0.00658 | 0.0898   |
| BAY41 | 0.00251 | 0.00198 | 0.02641 | 0.00159 | 0.01802 | 0.075131 |
| BAY42 | 0.00221 | 0.00077 | 0.00978 | 0.00081 | 0.01062 | 0.078093 |
| BAY43 | 0.00112 | 0.00143 | 0.01372 | 0.00115 | 0.02351 | 0.104769 |
| BAY44 | 0.00478 | 0.0006  | 0.00964 | 0.00065 | 0.02215 | 0.062822 |
| BAY45 | 0.00302 | 0.00132 | 0.01824 | 0.00117 | 0.01868 | 0.072361 |
| BAY46 | 0.0062  | 0.00089 | 0.01565 | 0.00099 | 0.02912 | 0.056436 |
| BAY47 | 0.0033  | 0.00028 | 0.0039  | 0.00026 | 0.01794 | 0.073791 |
| BAY48 | 0.00399 | 0.00054 | 0.00787 | 0.00048 | 0.02244 | 0.06927  |
| BAY49 | 1.62759 | 3.57548 | *****   | 0.13422 | 0.56221 | #VALUE!  |
| BAY50 | 0.00229 | 0.0004  | 0.00488 | 0.00034 | 0.01757 | 0.081301 |
| BAY51 | 0.00236 | 0.00075 | 0.00952 | 0.00083 | 0.01325 | 0.079249 |
| BAY52 | 0.00444 | 0.00052 | 0.00776 | 0.00058 | 0.02488 | 0.066411 |
| BAY53 | 0.0081  | 0.00031 | 0.00561 | 0.00036 | 0.04184 | 0.05477  |
| BAY54 | 0.00277 | 0.00031 | 0.00405 | 0.00029 | 0.01753 | 0.078431 |
| BAY55 | 0.00526 | 0.00067 | 0.01089 | 0.00056 | 0.02983 | 0.061076 |
| BAY56 | 0.00276 | 0.00065 | 0.00845 | 0.00063 | 0.01729 | 0.076291 |
| BAY57 | 0.00678 | 0.00025 | 0.00449 | 0.00037 | 0.02987 | 0.057395 |
| BAY58 | 0.00139 | 0.00234 | 0.026   | 0.00236 | 0.01028 | 0.090355 |
| BAY59 | 0.00283 | 0.00041 | 0.00541 | 0.00031 | 0.03055 | 0.075229 |
| BAY60 | 0.00121 | 0.0015  | 0.01469 | 0.00146 | 0.01214 | 0.101958 |
| BAY61 | 0.00377 | 0.00149 | 0.02463 | 0.00166 | 0.02108 | 0.060411 |
| BAY62 | 0.00223 | 0.00033 | 0.00409 | 0.0004  | 0.01098 | 0.082324 |
| BAY63 | 0.00343 | 0.0004  | 0.0055  | 0.00032 | 0.0327  | 0.072202 |
| BAY64 | 0.00371 | 0.00484 | 0.08019 | 0.00361 | 0.04102 | 0.060366 |
| BAY65 | 0.00396 | 0.00044 | 0.00634 | 0.00046 | 0.02585 | 0.068858 |
| BAY66 | 0.00248 | 0.00095 | 0.01229 | 0.00098 | 0.01185 | 0.076675 |
| BAY67 | 0.00197 | 0.00496 | 0.0755  | 0.00481 | 0.01691 | 0.065783 |

GLITTER!: Isotopic ratios: 1 sigma uncertainty.

| Pb207/Pb2 | Pb206/U23 | Pb207/U23 | Pb208/Th2 | Pb208/Pb2 | Th232/U23 | U238/Si29 |
|-----------|-----------|-----------|-----------|-----------|-----------|-----------|
| 0.00171   | 0.00255   | 0.1092    | 0.00075   | 0.00338   | 0.01247   | 0.00004   |
| 0.00086   | 0.00159   | 0.02468   | 0.00045   | 0.00138   | 0.00532   | 0.0001    |
| 0.02705   | 0.04801   | 10.30602  | 0.10443   | 0.0531    | 0.04358   | 0.0002    |
| 0.00094   | 0.0007    | 0.01266   | 0.00022   | 0.00407   | 0.01428   | 0.00004   |
| 0.00089   | 0.00159   | 0.02671   | 0.00045   | 0.00186   | 0.00724   | 0.00008   |
| 0.00373   | 0.00023   | 0.00898   | 0.00015   | 0.00767   | 0.00926   | 0.00004   |
| 0.00149   | 0.0018    | 0.06363   | 0.00065   | 0.00422   | 0.01282   | 0.00003   |
| 0.00177   | 0.0002    | 0.00473   | 0.0001    | 0.00453   | 0.00963   | 0.00006   |
| 0.00123   | 0.00237   | 0.07478   | 0.00079   | 0.00157   | 0.00573   | 0.00003   |
| 0.0009    | 0.00019   | 0.0028    | 0.00007   | 0.00259   | 0.00801   | 0.00015   |
| 0.0013    | 0.00015   | 0.00285   | 0.00006   | 0.00435   | 0.01239   | 0.00007   |
| 0.002     | 0.00021   | 0.0053    | 0.0001    | 0.0048    | 0.0095    | 0.00004   |
| 0.00081   | 0.00132   | 0.01899   | 0.00041   | 0.00079   | 0.00305   | 0.0001    |

|         |         |         |         |         |         |         |
|---------|---------|---------|---------|---------|---------|---------|
| 0.00083 | 0.00075 | 0.01139 | 0.00022 | 0.00263 | 0.00997 | 0.00006 |
| 0.00081 | 0.00115 | 0.01576 | 0.00048 | 0.00074 | 0.00217 | 0.00012 |
| 0.00219 | 0.00019 | 0.0054  | 0.0001  | 0.00492 | 0.00907 | 0.00004 |
| 0.00122 | 0.00195 | 0.04483 | 0.00044 | 0.00099 | 0.00506 | 0.00019 |
| 0.00105 | 0.00045 | 0.00807 | 0.00018 | 0.00238 | 0.00704 | 0.00006 |
| 0.0007  | 0.00068 | 0.00808 | 0.00022 | 0.00159 | 0.00584 | 0.00015 |
| 0.00137 | 0.00013 | 0.0025  | 0.00005 | 0.00529 | 0.01496 | 0.00009 |
| 0.00088 | 0.00022 | 0.00309 | 0.00009 | 0.00222 | 0.00667 | 0.00013 |
| 0.00084 | 0.00104 | 0.0161  | 0.00033 | 0.00236 | 0.00873 | 0.00007 |
| 0.00093 | 0.00119 | 0.02108 | 0.00038 | 0.00318 | 0.0116  | 0.00014 |
| 0.00076 | 0.00029 | 0.00369 | 0.0001  | 0.00278 | 0.0094  | 0.00017 |
| 0.00096 | 0.00158 | 0.02922 | 0.00061 | 0.00085 | 0.00285 | 0.00012 |
| 0.00092 | 0.0003  | 0.00444 | 0.00014 | 0.00173 | 0.0047  | 0.00009 |
| 0.0016  | 0.00318 | 0.07911 | 0.00093 | 0.00014 | 0.00056 | 0.00086 |
| 0.00643 | 0.00035 | 0.01802 | 0.00015 | 0.00562 | 0.00929 | 0.00003 |
| 0.00099 | 0.00013 | 0.00198 | 0.00007 | 0.00183 | 0.00455 | 0.00015 |
| 0.00116 | 0.00014 | 0.00236 | 0.00006 | 0.00339 | 0.00933 | 0.00011 |
| 0.00115 | 0.00015 | 0.0027  | 0.00007 | 0.00329 | 0.00891 | 0.00033 |
| 0.00113 | 0.00044 | 0.0084  | 0.00018 | 0.00322 | 0.00945 | 0.00005 |
| 0.00132 | 0.00285 | 0.07951 | 0.00087 | 0.00334 | 0.01292 | 0.00005 |
| 0.00106 | 0.00133 | 0.02756 | 0.00046 | 0.00196 | 0.00701 | 0.00016 |
| 0.00076 | 0.00028 | 0.00355 | 0.00011 | 0.00247 | 0.00801 | 0.0003  |
| 0.00123 | 0.00263 | 0.05801 | 0.00073 | 0.00032 | 0.00151 | 0.00026 |
| 0.0093  | 0.00977 | 4.87122 | 0.0054  | 0.02228 | 0.04336 | 0.00002 |
| 0.00156 | 0.00017 | 0.00363 | 0.00008 | 0.00448 | 0.01028 | 0.00006 |
| 0.0008  | 0.00092 | 0.01347 | 0.00037 | 0.00133 | 0.00422 | 0.00013 |
| 0.00102 | 0.00076 | 0.01458 | 0.00029 | 0.00358 | 0.01131 | 0.00005 |
| 0.00149 | 0.00017 | 0.00334 | 0.00008 | 0.00453 | 0.01016 | 0.00007 |
| 0.00143 | 0.00012 | 0.00248 | 0.00006 | 0.00367 | 0.00832 | 0.00015 |
| 0.00116 | 0.00147 | 0.03736 | 0.00052 | 0.00518 | 0.01725 | 0.00003 |
| 0.0009  | 0.00155 | 0.02284 | 0.00052 | 0.00257 | 0.00916 | 0.00064 |
| 0.00243 | 0.00022 | 0.00562 | 0.00013 | 0.00611 | 0.00977 | 0.00005 |
| 0.00182 | 0.0039  | 0.13511 | 0.00121 | 0.00462 | 0.01794 | 0.00015 |
| 0.00183 | 0.00207 | 0.08379 | 0.0008  | 0.00626 | 0.01822 | 0.00002 |
| 0.00117 | 0.00081 | 0.01703 | 0.0003  | 0.00575 | 0.01786 | 0.00004 |
| 0.00154 | 0.00021 | 0.00438 | 0.00011 | 0.00415 | 0.00919 | 0.00007 |
| 0.00088 | 0.00049 | 0.00737 | 0.00024 | 0.00153 | 0.00412 | 0.00011 |
| 0.00157 | 0.00155 | 0.04508 | 0.00061 | 0.00166 | 0.00535 | 0.00011 |
| 0.00124 | 0.00081 | 0.01798 | 0.00032 | 0.00525 | 0.0159  | 0.00003 |
| 0.00241 | 0.00022 | 0.0062  | 0.00012 | 0.00645 | 0.01174 | 0.00004 |
| 0.00102 | 0.00089 | 0.01656 | 0.00032 | 0.00627 | 0.0208  | 0.00007 |
| 0.00096 | 0.00166 | 0.0292  | 0.00059 | 0.0032  | 0.01117 | 0.00017 |
| 0.01161 | 0.01445 | 8.26538 | 0.0437  | 0.02914 | 0.01463 | 0.02039 |
| 0.00128 | 0.00275 | 0.06805 | 0.00103 | 0.00151 | 0.00519 | 0.00008 |
| 0.00074 | 0.00032 | 0.00383 | 0.00014 | 0.00138 | 0.00397 | 0.00029 |
| 0.00198 | 0.00024 | 0.00601 | 0.00016 | 0.0042  | 0.0074  | 0.00005 |
| 0.00101 | 0.00138 | 0.02763 | 0.00058 | 0.00199 | 0.00625 | 0.00006 |
| 0.00098 | 0.00044 | 0.00708 | 0.00019 | 0.00386 | 0.01123 | 0.00007 |
| 0.00172 | 0.00024 | 0.00551 | 0.00017 | 0.00363 | 0.0064  | 0.00006 |
| 0.00208 | 0.00019 | 0.0051  | 0.00011 | 0.00554 | 0.01075 | 0.00005 |
| 0.00147 | 0.00014 | 0.00277 | 0.00006 | 0.00692 | 0.01813 | 0.0001  |

|         |         |         |         |         |         |         |
|---------|---------|---------|---------|---------|---------|---------|
| 0.00079 | 0.00033 | 0.00425 | 0.00014 | 0.00234 | 0.00685 | 0.00041 |
| 0.00082 | 0.00032 | 0.00428 | 0.00012 | 0.00634 | 0.02084 | 0.00037 |
| 0.00133 | 0.00035 | 0.00754 | 0.00019 | 0.00398 | 0.00912 | 0.00018 |
| 0.00121 | 0.00057 | 0.01168 | 0.00024 | 0.00442 | 0.01313 | 0.0001  |
| 0.0016  | 0.00016 | 0.00345 | 0.0001  | 0.00428 | 0.00796 | 0.00007 |
| 0.00106 | 0.0002  | 0.00314 | 0.00008 | 0.00536 | 0.01674 | 0.00012 |
| 0.00139 | 0.00289 | 0.07233 | 0.00106 | 0.00228 | 0.00804 | 0.00016 |
| 0.00087 | 0.00036 | 0.00509 | 0.00016 | 0.00288 | 0.00864 | 0.00013 |
| 0.00149 | 0.00328 | 0.09671 | 0.00114 | 0.00472 | 0.01738 | 0.00007 |
| 0.00084 | 0.00037 | 0.00512 | 0.00017 | 0.00251 | 0.00722 | 0.00015 |
| 0.00205 | 0.00024 | 0.00583 | 0.00014 | 0.00582 | 0.01098 | 0.00005 |
| 0.00087 | 0.00043 | 0.00608 | 0.0002  | 0.00201 | 0.0057  | 0.00011 |
| 0.00469 | 0.00019 | 0.01352 | 0.00012 | 0.01695 | 0.02981 | 0.00019 |
| 0.00143 | 0.00304 | 0.08829 | 0.00111 | 0.00205 | 0.00745 | 0.00007 |
| 0.00134 | 0.00279 | 0.07026 | 0.00105 | 0.00116 | 0.00416 | 0.00011 |
| 0.00183 | 0.00019 | 0.0046  | 0.00009 | 0.00608 | 0.01468 | 0.00006 |
| 0.00106 | 0.00119 | 0.023   | 0.00045 | 0.00631 | 0.02153 | 0.00006 |
| 0.00229 | 0.00171 | 0.06594 | 0.00084 | 0.00626 | 0.0148  | 0.00001 |
| 0.00087 | 0.00102 | 0.01532 | 0.00046 | 0.00133 | 0.00401 | 0.00013 |
| 0.00202 | 0.0002  | 0.00528 | 0.00011 | 0.00601 | 0.01272 | 0.00005 |
| 0.00104 | 0.00134 | 0.02665 | 0.00052 | 0.00882 | 0.02926 | 0.00006 |
| 0.00144 | 0.0002  | 0.00454 | 0.00009 | 0.01041 | 0.02993 | 0.00037 |
| 0.00117 | 0.00186 | 0.04372 | 0.00074 | 0.00535 | 0.01757 | 0.00004 |

GLITTER!: Isotopic ratios: 1 sigma uncertainty.

| Pb207/Pb2 | Pb206/U23 | Pb207/U23 | Pb208/Th2 | Pb208/Pb2 | Th232/U23 | U238/Si29 |
|-----------|-----------|-----------|-----------|-----------|-----------|-----------|
| 0.00173   | 0.00192   | 0.05344   | 0.0003    | 0.0015    | 0.00859   | 0.00017   |
| 0.00078   | 0.00094   | 0.01168   | 0.00024   | 0.00654   | 0.0227    | 0.00003   |
| 0.00084   | 0.00019   | 0.00224   | 0.00006   | 0.00275   | 0.00755   | 0.00004   |
| 0.00107   | 0.0019    | 0.03751   | 0.00051   | 0.00325   | 0.01089   | 0.00005   |
| 0.00101   | 0.00092   | 0.015     | 0.00025   | 0.00368   | 0.01167   | 0.00005   |
| 0.00121   | 0.00294   | 0.06687   | 0.00067   | 0.00291   | 0.01131   | 0.00004   |
| 0.00194   | 0.00006   | 0.0014    | 0.00004   | 0.00376   | 0.00504   | 0.00026   |
| 0.00161   | 0.00028   | 0.00555   | 0.00014   | 0.00293   | 0.00527   | 0.00004   |
| 0.00108   | 0.00018   | 0.00256   | 0.00006   | 0.00289   | 0.00765   | 0.00012   |
| 0.00068   | 0.00038   | 0.00374   | 0.00021   | 0.00094   | 0.00161   | 0.00019   |
| 0.0009    | 0.00037   | 0.00486   | 0.00012   | 0.00209   | 0.00613   | 0.00008   |
| 0.00114   | 0.00182   | 0.0381    | 0.00047   | 0.0029    | 0.01006   | 0.00003   |
| 0.00146   | 0.00022   | 0.00398   | 0.00008   | 0.00388   | 0.00864   | 0.00009   |
| 0.00082   | 0.00077   | 0.00946   | 0.0002    | 0.00335   | 0.01119   | 0.00032   |
| 0.0083    | 0.0025    | 0.59144   | 0.00087   | 0.01803   | 0.03885   | 0.00002   |
| 0.00181   | 0.00028   | 0.00598   | 0.00016   | 0.00262   | 0.00395   | 0.00004   |
| 0.00077   | 0.00127   | 0.01534   | 0.00037   | 0.00049   | 0.00162   | 0.0001    |
| 0.00103   | 0.00153   | 0.02752   | 0.00047   | 0.00135   | 0.00423   | 0.00003   |
| 0.00143   | 0.00042   | 0.0078    | 0.00017   | 0.00302   | 0.00661   | 0.00005   |
| 0.00262   | 0.00023   | 0.0061    | 0.00013   | 0.0046    | 0.00584   | 0.00003   |

|         |         |         |         |         |         |         |
|---------|---------|---------|---------|---------|---------|---------|
| 0.00273 | 0.00017 | 0.00594 | 0.00013 | 0.00448 | 0.00488 | 0.00006 |
| 0.00095 | 0.00043 | 0.00572 | 0.0003  | 0.00102 | 0.00145 | 0.00007 |
| 0.00103 | 0.00025 | 0.00347 | 0.00007 | 0.00393 | 0.01156 | 0.00011 |
| 0.00069 | 0.00055 | 0.00559 | 0.00016 | 0.00106 | 0.0033  | 0.00013 |
| 0.00115 | 0.00216 | 0.04732 | 0.00055 | 0.00257 | 0.00918 | 0.00003 |
| 0.00135 | 0.00037 | 0.00677 | 0.00014 | 0.00284 | 0.00662 | 0.00004 |
| 0.0009  | 0.00034 | 0.00424 | 0.00018 | 0.00068 | 0.00133 | 0.0001  |
| 0.00284 | 0.00038 | 0.01326 | 0.00029 | 0.00486 | 0.00503 | 0.00005 |
| 0.00165 | 0.00019 | 0.00397 | 0.00006 | 0.00577 | 0.01568 | 0.00006 |
| 0.00073 | 0.00086 | 0.00941 | 0.00022 | 0.00173 | 0.00612 | 0.0001  |
| 0.00074 | 0.00032 | 0.00343 | 0.0001  | 0.00108 | 0.00324 | 0.00014 |
| 0.0008  | 0.00043 | 0.00491 | 0.00013 | 0.0014  | 0.00423 | 0.00008 |
| 0.00087 | 0.00082 | 0.01072 | 0.00021 | 0.00343 | 0.0118  | 0.00005 |
| 0.00094 | 0.00169 | 0.0269  | 0.00044 | 0.0015  | 0.00525 | 0.00004 |
| 0.00928 | 0.01163 | 5.19686 | 0.00439 | 0.01903 | 0.0419  | 0.00001 |
| 0.00106 | 0.00005 | 0.00073 | 0.00002 | 0.00162 | 0.00342 | 0.00028 |
| 0.00074 | 0.00103 | 0.01141 | 0.0004  | 0.00057 | 0.0014  | 0.00013 |
| 0.00089 | 0.0014  | 0.01949 | 0.00036 | 0.00236 | 0.00826 | 0.00007 |
| 0.00069 | 0.00034 | 0.00331 | 0.00009 | 0.0016  | 0.00539 | 0.00017 |
| 0.00209 | 0.00037 | 0.0084  | 0.00021 | 0.00382 | 0.00548 | 0.00002 |
| 0.00165 | 0.00015 | 0.00298 | 0.00007 | 0.0036  | 0.00699 | 0.00008 |
| 0.00095 | 0.00015 | 0.00187 | 0.00005 | 0.00247 | 0.00673 | 0.00015 |
| 0.00091 | 0.0017  | 0.02341 | 0.00045 | 0.00158 | 0.00545 | 0.00012 |
| 0.00143 | 0.0002  | 0.00347 | 0.00008 | 0.00318 | 0.00678 | 0.00006 |
| 0.00499 | 0.00011 | 0.00363 | 0.00006 | 0.01043 | 0.00941 | 0.00004 |
| 0.00141 | 0.00043 | 0.00769 | 0.00018 | 0.00256 | 0.00529 | 0.00003 |
| 0.00119 | 0.0031  | 0.05947 | 0.00077 | 0.0011  | 0.00411 | 0.00007 |
| 0.00158 | 0.00015 | 0.00278 | 0.00005 | 0.00516 | 0.01201 | 0.00007 |
| 0.00154 | 0.00147 | 0.03836 | 0.00079 | 0.00213 | 0.00371 | 0.00003 |
| 0.00078 | 0.00101 | 0.01197 | 0.00026 | 0.00238 | 0.00841 | 0.00009 |
| 0.0007  | 0.00092 | 0.00958 | 0.00025 | 0.00093 | 0.00317 | 0.00014 |
| 0.00178 | 0.00206 | 0.07395 | 0.00053 | 0.00694 | 0.02267 | 0.00002 |
| 0.0009  | 0.00127 | 0.01761 | 0.00043 | 0.00093 | 0.00269 | 0.00007 |
| 0.00118 | 0.00276 | 0.053   | 0.00066 | 0.00208 | 0.00786 | 0.00005 |
| 0.00092 | 0.00035 | 0.00449 | 0.00012 | 0.00201 | 0.00531 | 0.00015 |
| 0.0023  | 0.00025 | 0.00586 | 0.00012 | 0.00498 | 0.00731 | 0.00004 |
| 0.00096 | 0.00159 | 0.02447 | 0.00047 | 0.00176 | 0.00551 | 0.00005 |
| 0.0008  | 0.00018 | 0.0019  | 0.00006 | 0.00235 | 0.00684 | 0.00024 |
| 0.00097 | 0.00039 | 0.00522 | 0.00014 | 0.00212 | 0.00516 | 0.00009 |
| 0.00093 | 0.00061 | 0.00815 | 0.00018 | 0.00303 | 0.00931 | 0.00006 |
| 0.00086 | 0.00036 | 0.0044  | 0.00012 | 0.00188 | 0.00522 | 0.00013 |
| 0.00108 | 0.00142 | 0.02478 | 0.00047 | 0.00188 | 0.00531 | 0.00005 |
| 0.00105 | 0.00098 | 0.01524 | 0.00025 | 0.00589 | 0.01968 | 0.00004 |
| 0.00087 | 0.00072 | 0.00919 | 0.00022 | 0.0018  | 0.00541 | 0.00006 |
| 0.0043  | 0.0003  | 0.0095  | 0.00019 | 0.00837 | 0.00736 | 0.00002 |
| 0.00145 | 0.00166 | 0.03957 | 0.00063 | 0.00301 | 0.00714 | 0.00003 |
| 0.00964 | 0.01112 | 4.96476 | 0.00893 | 0.02062 | 0.02247 | 0.00008 |
| 0.00183 | 0.00174 | 0.05266 | 0.00058 | 0.00582 | 0.01427 | 0.00001 |
| 0.00426 | 0.00032 | 0.00959 | 0.00022 | 0.00853 | 0.00677 | 0.00003 |
| 0.00156 | 0.00047 | 0.01044 | 0.00015 | 0.00134 | 0.00399 | 0.00013 |
| 0.0008  | 0.00169 | 0.02021 | 0.00047 | 0.00144 | 0.00477 | 0.00014 |

|         |         |         |         |         |         |         |
|---------|---------|---------|---------|---------|---------|---------|
| 0.00159 | 0.0011  | 0.02522 | 0.00033 | 0.00908 | 0.02375 | 0.00003 |
| 0.00096 | 0.00195 | 0.03018 | 0.00052 | 0.00741 | 0.02507 | 0.00006 |
| 0.0021  | 0.00023 | 0.0053  | 0.00009 | 0.00742 | 0.01418 | 0.00009 |
| 0.00163 | 0.00443 | 0.12163 | 0.00119 | 0.00177 | 0.00611 | 0.00004 |
| 0.00105 | 0.00006 | 0.00077 | 0.00002 | 0.00311 | 0.00769 | 0.00032 |
| 0.00114 | 0.00208 | 0.03952 | 0.00084 | 0.00168 | 0.00392 | 0.00007 |
| 0.0019  | 0.00476 | 0.184   | 0.00129 | 0.00245 | 0.00847 | 0.00003 |
| 0.00085 | 0.00174 | 0.02206 | 0.00052 | 0.00066 | 0.00208 | 0.00023 |
| 0.00267 | 0.00028 | 0.00662 | 0.00015 | 0.00537 | 0.00661 | 0.00004 |
| 0.00086 | 0.00106 | 0.01377 | 0.00039 | 0.00149 | 0.00379 | 0.0001  |
| 0.00122 | 0.0005  | 0.0081  | 0.00018 | 0.00358 | 0.00873 | 0.00007 |
| 0.00104 | 0.00159 | 0.0263  | 0.00052 | 0.00223 | 0.00624 | 0.00007 |
| 0.00101 | 0.00095 | 0.01377 | 0.00034 | 0.00218 | 0.00562 | 0.00008 |
| 0.00137 | 0.00215 | 0.04936 | 0.00066 | 0.00398 | 0.01153 | 0.00002 |

GLITTER!: Isotopic ratios: 1 sigma uncertainty.

| Pb207/Pb2 | Pb206/U23 | Pb207/U23 | Pb208/Th2 | Pb208/Pb2 | Th232/U23 | U238/Si29 |
|-----------|-----------|-----------|-----------|-----------|-----------|-----------|
| 0.00164   | 0.00034   | 0.00491   | 0.00012   | 0.00393   | 0.01199   | 0.00003   |
| 0.00047   | 0.00027   | 0.00212   | 0.00006   | 0.00178   | 0.01033   | 0.00027   |
| 0.00047   | 0.00034   | 0.00286   | 0.0001    | 0.0009    | 0.00413   | 0.00019   |
| 0.0008    | 0.00645   | 0.16204   | 0.00073   | 0.00112   | 0.01272   | 0.00006   |
| 0.00106   | 0.00064   | 0.00761   | 0.00019   | 0.00233   | 0.00988   | 0.00004   |
| 0.00064   | 0.00027   | 0.00271   | 0.00008   | 0.00171   | 0.0073    | 0.00014   |
| 0.00103   | 0.00067   | 0.00752   | 0.00016   | 0.00338   | 0.01685   | 0.00003   |
| 0.0006    | 0.0005    | 0.00348   | 0.00011   | 0.00147   | 0.00898   | 0.00008   |
| 0.00049   | 0.00277   | 0.02854   | 0.00033   | 0.00272   | 0.02808   | 0.00005   |
| 0.00053   | 0.00271   | 0.03237   | 0.00036   | 0.00193   | 0.01838   | 0.00004   |
| 0.00069   | 0.00009   | 0.00081   | 0.00001   | 0.00346   | 0.02506   | 0.00041   |
| 0.00053   | 0.00034   | 0.00309   | 0.00009   | 0.00156   | 0.00751   | 0.00015   |
| 0.00149   | 0.00126   | 0.02337   | 0.00031   | 0.00463   | 0.02073   | 0.00004   |
| 0.0007    | 0.0029    | 0.04511   | 0.00048   | 0.00204   | 0.01624   | 0.00002   |
| 0.00041   | 0.00082   | 0.00754   | 0.00035   | 0.00017   | 0.00066   | 0.00022   |
| 0.00187   | 0.00025   | 0.00303   | 0.00007   | 0.00644   | 0.02057   | 0.00006   |
| 0.00057   | 0.00262   | 0.03114   | 0.00045   | 0.00137   | 0.01099   | 0.00004   |
| 0.00053   | 0.00213   | 0.02478   | 0.00039   | 0.00151   | 0.011     | 0.0001    |
| 0.00054   | 0.00102   | 0.00797   | 0.00016   | 0.00295   | 0.02305   | 0.00007   |
| 0.00069   | 0.00293   | 0.04393   | 0.00048   | 0.00257   | 0.02033   | 0.00003   |
| 0.00034   | 0.00034   | 0.00202   | 0.0001    | 0.00064   | 0.00312   | 0.00053   |
| 0.00067   | 0.00423   | 0.0687    | 0.00075   | 0.00113   | 0.00901   | 0.00004   |
| 0.00077   | 0.00017   | 0.00171   | 0.00008   | 0.00158   | 0.00441   | 0.00017   |
| 0.00048   | 0.00172   | 0.01287   | 0.00028   | 0.00271   | 0.02188   | 0.00007   |
| 0.00059   | 0.00099   | 0.00789   | 0.00019   | 0.0026    | 0.01757   | 0.00009   |
| 0.00092   | 0.00057   | 0.00563   | 0.00018   | 0.00243   | 0.01002   | 0.00005   |
| 0.00056   | 0.00359   | 0.04479   | 0.00067   | 0.00147   | 0.01072   | 0.00009   |
| 0.00062   | 0.00426   | 0.05537   | 0.00073   | 0.00119   | 0.00961   | 0.00007   |
| 0.00061   | 0.00038   | 0.00383   | 0.00014   | 0.00175   | 0.00641   | 0.00028   |
| 0.00111   | 0.00677   | 0.21423   | 0.00118   | 0.00131   | 0.01076   | 0.00003   |



|         |         |         |         |         |         |         |
|---------|---------|---------|---------|---------|---------|---------|
| 0.00129 | 0.00017 | 0.00274 | 0.00004 | 0.00681 | 0.03356 | 0.00017 |
| 0.00064 | 0.00039 | 0.00404 | 0.00015 | 0.0017  | 0.00597 | 0.00017 |
| 0.00061 | 0.00149 | 0.01259 | 0.0003  | 0.00252 | 0.01676 | 0.00006 |
| 0.0006  | 0.00289 | 0.03115 | 0.00055 | 0.002   | 0.0144  | 0.00004 |
| 0.00061 | 0.00148 | 0.01283 | 0.0003  | 0.0027  | 0.01791 | 0.00005 |
| 0.00042 | 0.00507 | 0.04464 | 0.00086 | 0.00053 | 0.0044  | 0.0004  |
| 0.00158 | 0.0004  | 0.00489 | 0.00013 | 0.00467 | 0.01605 | 0.00006 |
| 0.00184 | 0.00028 | 0.00392 | 0.0001  | 0.00573 | 0.01696 | 0.00006 |
| 0.001   | 0.0034  | 0.06561 | 0.00078 | 0.0034  | 0.01979 | 0.00003 |
| 0.00075 | 0.00059 | 0.00456 | 0.00017 | 0.00214 | 0.01029 | 0.00006 |
| 0.00076 | 0.00441 | 0.07076 | 0.00093 | 0.00229 | 0.01537 | 0.00005 |
| 0.00056 | 0.00178 | 0.01473 | 0.0008  | 0.00046 | 0.00163 | 0.00006 |
| 0.00053 | 0.00049 | 0.00454 | 0.00018 | 0.00198 | 0.00759 | 0.00021 |
| 0.0007  | 0.00334 | 0.04202 | 0.00083 | 0.00153 | 0.00896 | 0.00005 |
| 0.00081 | 0.005   | 0.07951 | 0.00111 | 0.00165 | 0.01078 | 0.0001  |
| 0.00184 | 0.00041 | 0.00568 | 0.0002  | 0.00456 | 0.01034 | 0.00007 |
| 0.00043 | 0.0004  | 0.00292 | 0.00012 | 0.00127 | 0.00626 | 0.00053 |
| 0.00065 | 0.00019 | 0.00174 | 0.00009 | 0.00157 | 0.00474 | 0.00054 |
| 0.0007  | 0.00073 | 0.00878 | 0.00033 | 0.00154 | 0.0048  | 0.00015 |
| 0.00238 | 0.00014 | 0.00175 | 0.00006 | 0.00709 | 0.01473 | 0.00008 |
| 0.00053 | 0.0005  | 0.00433 | 0.00019 | 0.00144 | 0.00534 | 0.00021 |
| 0.00068 | 0.0004  | 0.00475 | 0.00013 | 0.00405 | 0.01727 | 0.00032 |
| 0.00108 | 0.00167 | 0.02341 | 0.0005  | 0.00403 | 0.01755 | 0.00002 |
| 0.00116 | 0.00064 | 0.00793 | 0.00031 | 0.00352 | 0.0098  | 0.00005 |
| 0.00193 | 0.00038 | 0.00487 | 0.00014 | 0.00596 | 0.01668 | 0.00003 |
| 0.00087 | 0.00344 | 0.05367 | 0.00091 | 0.00304 | 0.01642 | 0.00002 |
| 0.00063 | 0.00206 | 0.0283  | 0.00081 | 0.00114 | 0.00432 | 0.00015 |
| 0.00179 | 0.00034 | 0.00412 | 0.00014 | 0.00512 | 0.01321 | 0.00007 |
| 0.00056 | 0.0019  | 0.02106 | 0.00047 | 0.00513 | 0.03042 | 0.0003  |
| 0.00063 | 0.00197 | 0.01717 | 0.00054 | 0.00504 | 0.02659 | 0.00006 |
| 0.0006  | 0.00058 | 0.00589 | 0.00026 | 0.00259 | 0.00842 | 0.00028 |
| 0.00067 | 0.00215 | 0.02969 | 0.00085 | 0.00168 | 0.00632 | 0.00016 |
| 0.00076 | 0.00124 | 0.01649 | 0.0003  | 0.01177 | 0.06893 | 0.00013 |
| 0.00089 | 0.00505 | 0.07359 | 0.00133 | 0.00289 | 0.01641 | 0.00008 |
| 0.00098 | 0.00548 | 0.09384 | 0.00144 | 0.00254 | 0.01452 | 0.00004 |
| 0.00097 | 0.00406 | 0.08436 | 0.00138 | 0.00092 | 0.00413 | 0.00019 |
| 0.00058 | 0.00046 | 0.00426 | 0.00021 | 0.00125 | 0.00409 | 0.00027 |
| 0.00161 | 0.00022 | 0.0026  | 0.00008 | 0.00531 | 0.01647 | 0.00007 |
| 0.00109 | 0.00615 | 0.10528 | 0.00169 | 0.00102 | 0.00569 | 0.00006 |
| 0.00082 | 0.00201 | 0.02238 | 0.00062 | 0.0034  | 0.01591 | 0.00004 |
| 0.00264 | 0.00044 | 0.00652 | 0.00019 | 0.00731 | 0.0151  | 0.00004 |
| 0.00074 | 0.00234 | 0.02428 | 0.00074 | 0.00229 | 0.01074 | 0.00005 |
| 0.00065 | 0.00058 | 0.00634 | 0.0003  | 0.00239 | 0.00687 | 0.0002  |
| 0.00055 | 0.00041 | 0.00383 | 0.0002  | 0.00175 | 0.00546 | 0.00039 |
| 0.00095 | 0.00354 | 0.05319 | 0.00111 | 0.00372 | 0.01729 | 0.00003 |
| 0.00094 | 0.00027 | 0.00317 | 0.00016 | 0.00248 | 0.00576 | 0.00017 |
| 0.00077 | 0.00266 | 0.02793 | 0.00086 | 0.00289 | 0.01341 | 0.00007 |
| 0.00067 | 0.0016  | 0.02025 | 0.0008  | 0.00163 | 0.00501 | 0.0003  |
| 0.00071 | 0.0013  | 0.01124 | 0.00043 | 0.00324 | 0.01444 | 0.0001  |
| 0.00338 | 0.00052 | 0.01898 | 0.00047 | 0.01144 | 0.01678 | 0.00006 |
| 0.00147 | 0.00035 | 0.00422 | 0.00017 | 0.00478 | 0.01255 | 0.00008 |

|         |         |         |         |         |         |         |
|---------|---------|---------|---------|---------|---------|---------|
| 0.00096 | 0.00127 | 0.01553 | 0.00055 | 0.00243 | 0.00788 | 0.00011 |
| 0.00157 | 0.0061  | 0.14725 | 0.00254 | 0.00604 | 0.02217 | 0.00005 |
| 0.00069 | 0.00057 | 0.0065  | 0.00031 | 0.00299 | 0.00811 | 0.00024 |
| 0.00228 | 0.00047 | 0.00694 | 0.0002  | 0.00737 | 0.0167  | 0.00003 |
| 0.00071 | 0.00053 | 0.00607 | 0.0003  | 0.00301 | 0.00795 | 0.0002  |
| 0.00072 | 0.00046 | 0.00521 | 0.00025 | 0.00373 | 0.00998 | 0.00022 |
| 0.00212 | 0.00046 | 0.00626 | 0.00023 | 0.00609 | 0.01262 | 0.00004 |
| 0.00097 | 0.00436 | 0.06329 | 0.00152 | 0.00305 | 0.0133  | 0.00009 |
| 0.0007  | 0.00119 | 0.01505 | 0.0007  | 0.00119 | 0.00307 | 0.00025 |
| 0.00163 | 0.00083 | 0.01175 | 0.00038 | 0.00698 | 0.01932 | 0.00006 |
| 0.00202 | 0.00545 | 0.24982 | 0.00381 | 0.00059 | 0.00137 | 0.00031 |
| 0.00071 | 0.00037 | 0.00416 | 0.00021 | 0.00218 | 0.00551 | 0.00031 |
| 0.00116 | 0.00546 | 0.08755 | 0.00188 | 0.00226 | 0.0101  | 0.00009 |
| 0.00105 | 0.00189 | 0.02321 | 0.0007  | 0.00554 | 0.02125 | 0.00004 |
| 0.00145 | 0.00044 | 0.00494 | 0.00019 | 0.00465 | 0.01263 | 0.00005 |
| 0.00079 | 0.00053 | 0.00684 | 0.00031 | 0.00329 | 0.00825 | 0.00022 |
| 0.00084 | 0.0018  | 0.01833 | 0.00069 | 0.00552 | 0.02142 | 0.00008 |
| 0.00107 | 0.00018 | 0.00236 | 0.00007 | 0.00953 | 0.03514 | 0.00026 |
| 0.00073 | 0.00048 | 0.00571 | 0.00028 | 0.00201 | 0.00504 | 0.00039 |
| 0.0009  | 0.00123 | 0.0126  | 0.00047 | 0.01045 | 0.0396  | 0.00007 |
| 0.00079 | 0.00039 | 0.00492 | 0.00023 | 0.00434 | 0.01099 | 0.0003  |
| 0.00707 | 0.00026 | 0.00593 | 0.00015 | 0.01652 | 0.01527 | 0.00003 |
| 0.00107 | 0.00203 | 0.02614 | 0.00084 | 0.00428 | 0.0148  | 0.00004 |
| 0.0011  | 0.00377 | 0.05468 | 0.00148 | 0.00465 | 0.01748 | 0.00007 |
| 0.00096 | 0.00052 | 0.00718 | 0.00046 | 0.00114 | 0.00178 | 0.00049 |
| 0.00179 | 0.00033 | 0.00412 | 0.00014 | 0.00749 | 0.01992 | 0.00006 |
| 0.00087 | 0.00049 | 0.00646 | 0.00031 | 0.00418 | 0.00932 | 0.00023 |
| 0.00097 | 0.00211 | 0.03634 | 0.00131 | 0.00134 | 0.00323 | 0.00022 |
| 0.00111 | 0.00277 | 0.05468 | 0.00167 | 0.00308 | 0.00765 | 0.00023 |
| 0.00285 | 0.00957 | 0.35332 | 0.00356 | 0.0021  | 0.00848 | 0.00008 |
| 0.00102 | 0.00213 | 0.03847 | 0.00133 | 0.0023  | 0.00549 | 0.0004  |
| 0.00094 | 0.0005  | 0.00725 | 0.00034 | 0.00298 | 0.00625 | 0.00025 |
| 0.00113 | 0.00043 | 0.00434 | 0.00018 | 0.00516 | 0.01535 | 0.00011 |
| 0.00329 | 0.0003  | 0.00408 | 0.0001  | 0.01418 | 0.02734 | 0.00004 |
| 0.00099 | 0.00193 | 0.02171 | 0.0008  | 0.00805 | 0.02747 | 0.00007 |
| 0.00079 | 0.0005  | 0.00633 | 0.00022 | 0.00551 | 0.01765 | 0.00042 |
| 0.00094 | 0.00024 | 0.00325 | 0.00016 | 0.00484 | 0.01031 | 0.00028 |
| 0.00119 | 0.00253 | 0.05216 | 0.00146 | 0.0029  | 0.00706 | 0.00016 |
| 0.00203 | 0.00693 | 0.24888 | 0.0034  | 0.0016  | 0.0048  | 0.00032 |

analysis

GLITTER!: Age estimates (ma).

| Rho      | Pb207/Pb2 | Pb206/U23 | Pb207/U23 | Pb208/Th2 | Pb208/Pb2 |
|----------|-----------|-----------|-----------|-----------|-----------|
| 0.047315 | 1279.3    | 1120.3    | 1160.2    | 1203.1    | 0         |
| 0.077748 | 695       | 636.9     | 643.1     | 644.7     | 0         |
| 0.048229 | 1858.1    | 1885.9    | 1861.2    | 1935.2    | 0         |
| 0.088989 | 403.7     | 329.9     | 345.1     | 324.6     | 0         |
| 0.048092 | 1403.3    | 1304.2    | 1336      | 1242.1    | 0         |
| 0.072396 | 1002.5    | 926.3     | 944.5     | 885       | 0         |
| 0.003496 | 4909.9    | 377.3     | 2095.4    | 1977.8    | 0         |
| 0.004228 | 4843      | 400.5     | 2023.9    | 649.6     | 0         |
| 0.042644 | 592.4     | 87.5      | 107.1     | 95.4      | 0         |
| 0.075219 | 884.9     | 789.6     | 803.4     | 778.3     | 0         |
| 0.041841 | 365.2     | 90.1      | 101.4     | 89.9      | 0         |
| 0.086486 | 138.2     | 90.1      | 91.5      | 96.8      | 0         |
| 0.082985 | 727.7     | 653.4     | 676.6     | 649.8     | 0         |
| 0.050171 | 1731      | 1771.7    | 1745.1    | 1776.1    | 0         |
| 0.040816 | 231.8     | 60.3      | 63.6      | 62.8      | 0         |
| 0.041801 | 574.1     | 57.5      | 73.1      | 72.8      | 0         |
| 0.082391 | 570.8     | 557       | 563.4     | 576.4     | 0         |
| 0.055588 | 1006.2    | 979.7     | 978.4     | 984.6     | 0         |
| 0.064346 | 1150.4    | 1144.6    | 1151.2    | 1176.6    | 0         |
| 0.041667 | 318.1     | 87.4      | 95.5      | 89.9      | 0         |
| 0.044643 | 335.6     | 87.7      | 96.2      | 93        | 0         |
| 0.004867 | 4849.6    | 420.5     | 2123.2    | 4587.8    | 0         |
| 0.055556 | 679.3     | 141.8     | 178.2     | 152.6     | 0         |
| 0.082126 | 246.7     | 89.8      | 95.6      | 96        | 0         |
| 0.016667 | 2970.9    | 110.9     | 419.2     | 227.9     | 0         |
| 0.059848 | 1392.3    | 1389.2    | 1387.7    | 1426.9    | 0         |
| 0.080409 | 611.8     | 586       | 586       | 597.6     | 0         |
| 0.068904 | 626.5     | 598.9     | 602.5     | 600       | 0         |
| 0.05163  | 486.1     | 92        | 112.7     | 96.6      | 0         |
| 0.066496 | 1162.1    | 1192.2    | 1166.6    | 1139.8    | 0         |
| 0.049896 | 1826      | 1549.6    | 1676.3    | 1692.6    | 0         |
| 0.077703 | 520.3     | 485.3     | 486.4     | 512.1     | 0         |
| 0.059206 | 1163.3    | 1189.2    | 1169.9    | 1221.7    | 0         |
| 0.072373 | 585.1     | 543       | 545.9     | 548.7     | 0         |
| 0.059732 | 368.1     | 290.6     | 294.3     | 299.3     | 0         |
| 0.033287 | 2585.7    | 1752.1    | 2175.6    | 1890      | 0         |
| 0.051688 | 779.8     | 615.6     | 651       | 679.1     | 0         |
| 0.00451  | 4910.3    | 845.8     | 2806.6    | 1174.3    | 0         |
| 0.074434 | 637.8     | 595.2     | 596.1     | 603.3     | 0         |

|          |        |        |         |         |   |
|----------|--------|--------|---------|---------|---|
| 0.045455 | 548.5  | 68.4   | 83.6    | 72.4    | 0 |
| 0.067538 | 1067.4 | 1095.4 | 1086.9  | 1115.9  | 0 |
| 0.043257 | 1197   | 1217.7 | 1203.8  | 1207.8  | 0 |
| 0.075528 | 1040.9 | 1033.4 | 1033.1  | 974.2   | 0 |
| 0.063622 | 590.9  | 587.4  | 583     | 585.7   | 0 |
| 0.080189 | 159.8  | 87.1   | 89.3    | 86.7    | 0 |
| 2.742331 | #NUM!  | 27053  | #VALUE! | #VALUE! | 0 |
| 0.038397 | 632.5  | 967.6  | 869.6   | 980.2   | 0 |
| 0.024253 | 2391.8 | 2444.5 | 2401.6  | 2445.9  | 0 |
| 0.067797 | 645.6  | 648.5  | 640.3   | 703.9   | 0 |
| 0.036313 | 519.2  | 69.1   | 81.4    | 79.1    | 0 |
| 0.047199 | 723.4  | 548.4  | 575.9   | 613.5   | 0 |
| 0.040656 | 389.7  | 373.4  | 374.5   | 410.2   | 0 |
| 0.024272 | 1514.3 | 95.6   | 181     | 156.2   | 0 |
| 0.077174 | 556    | 552.8  | 544.3   | 589.8   | 0 |
| 0.013306 | 2886.7 | 318.3  | 880.3   | 1154.5  | 0 |
| 0.004579 | 4789   | 288.3  | 1694.1  | 5196.2  | 0 |
| 0.047425 | 658.9  | 671.1  | 653.8   | 718     | 0 |
| 0.042254 | 294.2  | 90.3   | 96.3    | 100     | 0 |
| 0.040865 | 398.8  | 98.2   | 107.7   | 100.2   | 0 |
| 0.02227  | 1971.5 | 159.3  | 345.7   | 247.9   | 0 |
| 0.052459 | 568.2  | 110.4  | 131.4   | 127.3   | 0 |
| 0.085595 | 390.1  | 326.6  | 334     | 358.6   | 0 |
| 0.035789 | 463.8  | 94.6   | 111.1   | 101.8   | 0 |
| 0.027839 | 1162.8 | 1078.6 | 1114    | 1070.3  | 0 |
| 0.040395 | 1102.7 | 935.5  | 969.1   | 1026.7  | 0 |
| 0.075342 | 363.1  | 254.4  | 264.3   | 280.6   | 0 |
| 0.034251 | 2001.8 | 1924.5 | 1954.9  | 2098    | 0 |
| 0.053333 | 276.2  | 87.4   | 95.2    | 98      | 0 |
| 0.034543 | 1103.2 | 1198.4 | 1130.2  | 1242.3  | 0 |
| 0.091391 | 563    | 545.2  | 549.5   | 629     | 0 |
| 0.063158 | 468.5  | 87.7   | 102.5   | 95.6    | 0 |
| 0.060384 | 528.3  | 499.8  | 511.3   | 535.3   | 0 |
| 0.069556 | 989.6  | 987.2  | 994.1   | 1064.7  | 0 |
| 0.03125  | 1869.7 | 107    | 232.4   | 189.5   | 0 |
| 0.002099 | 4811.4 | 1133.5 | 3128.9  | 11932.1 | 0 |
| 0.084906 | 382.7  | 279.3  | 288.3   | 328.4   | 0 |
| 0.044534 | 500.8  | 223.6  | 246.4   | 245.5   | 0 |
| 0.038647 | 449.2  | 97     | 111.8   | 103.2   | 0 |
| 0.039394 | 653.6  | 70.3   | 86.9    | 85.1    | 0 |

GLITTER!: Age estimates (ma).

| Rho      | Pb207/Pb2 | Pb206/U23 | Pb207/U23 | Pb208/Th2 | Pb208/Pb2 |
|----------|-----------|-----------|-----------|-----------|-----------|
| 0.002976 | 4894.6    | 7458.2    | 4790.4    | *****     | 0         |
| 0.074106 | 305.9     | 353       | 243.5     | 209.2     | 0         |
| 0.096774 | 134.9     | 158.7     | 109.8     | 83.5      | 0         |

|          |        |        |        |        |   |
|----------|--------|--------|--------|--------|---|
| 0.066435 | 1688.3 | 2506.1 | 1756.3 | 1376.9 | 0 |
| 0.127717 | 46.7   | 270.6  | 212.7  | 172.9  | 0 |
| 0.088889 | 75.9   | 104.9  | 72.3   | 59.7   | 0 |
| 0.088235 | 35.5   | 54.4   | 47.4   | 37.4   | 0 |
| 0.068292 | 2116.9 | 3487   | 2696.6 | 855.5  | 0 |
| 0.107407 | 317.6  | 499.9  | 467.7  | 406.9  | 0 |
| 0.103825 | 116.9  | 209.7  | 193.8  | 163.3  | 0 |
| 0.115429 | 411.4  | 576.6  | 538.8  | 453.6  | 0 |
| 0.07874  | 27.2   | 45.5   | 45.8   | 31.8   | 0 |
| 0.116667 | 248.9  | 40.3   | 43.5   | 20.7   | 0 |
| 0.10628  | 119.8  | 98.8   | 69.5   | 57     | 0 |
| 0.08658  | 429.2  | 76.1   | 60     | 41.5   | 0 |
| 0.083333 | 869.5  | 70.4   | 69.4   | 45.1   | 0 |
| 0.087719 | 211.6  | 49.8   | 50.8   | 38.4   | 0 |
| 0.119461 | 205.2  | 319.7  | 217.2  | 176.5  | 0 |
| 0.024672 | 1390.3 | 1513.2 | 1253.2 | 971.2  | 0 |
| 0.07991  | 725.4  | 720.3  | 579.6  | 541.5  | 0 |
| 0.07483  | 476    | 52.3   | 59.2   | 48.3   | 0 |
| 0.08377  | 791.1  | 60.1   | 56     | 42.6   | 0 |
| 0.088083 | 736.7  | 65.9   | 61.5   | 43.9   | 0 |
| 0.084746 | 725.4  | 56.9   | 53.3   | 40.9   | 0 |
| 0.126904 | 76.9   | 121.7  | 82.3   | 69.9   | 0 |
| 0.074074 | 1087.7 | 73.9   | 76.4   | 56.1   | 0 |
| 0.085131 | 1438   | 1824.8 | 1418.6 | 1309.3 | 0 |
| 0.136752 | 3.4    | 155.7  | 101    | 91.8   | 0 |
| 0.102845 | 199.6  | 243.8  | 228.6  | 198.3  | 0 |
| 0.056437 | 2369   | 1552.3 | 1593   | 1110.3 | 0 |
| 0.067877 | 788.5  | 357.9  | 314    | 259    | 0 |
| 0.09949  | 296.4  | 355.5  | 241.7  | 212.6  | 0 |
| 0.111111 | 511.5  | 188.7  | 213.4  | 652.7  | 0 |
| 0.065395 | 1058.3 | 65.4   | 71.2   | 47.6   | 0 |
| 0.078912 | 989.6  | 276    | 287.6  | 282.7  | 0 |
| 0.136691 | 199.2  | 203.7  | 205.9  | 135.4  | 0 |
| 0.140562 | 430    | 715.8  | 485.2  | 432.9  | 0 |
| 0.071429 | 760    | 56     | 54     | 37.5   | 0 |
| 0.048677 | 2511.2 | 3314.6 | 2463.9 | 1370.2 | 0 |
| 0.080745 | 295.5  | 61.7   | 68.4   | 60.8   | 0 |
| 0.093596 | 597.8  | 192.6  | 208.2  | 211.3  | 0 |
| 0.077236 | 958.9  | 60.4   | 60     | 44.4   | 0 |
| 0.087432 | 719    | 60.9   | 55.2   | 41.9   | 0 |
| 0.121061 | 271.7  | 353.5  | 250.3  | 217.2  | 0 |
| 0.103368 | 449.2  | 453.7  | 436.1  | 390.5  | 0 |
| 0.097867 | 407.7  | 351.3  | 255.6  | 225.1  | 0 |
| 0.079439 | 904.4  | 59     | 59.1   | 46.1   | 0 |
| 0.112266 | 334.8  | 271.6  | 257.2  | 177.5  | 0 |
| 0.072351 | 1143.3 | 1084.6 | 1080.5 | 1051.3 | 0 |
| 0.093023 | 545.9  | 69.5   | 64.1   | 50.2   | 0 |
| 0.078358 | 890.6  | 165.9  | 160.1  | 128.8  | 0 |
| 0.07196  | 855.1  | 73.5   | 69.5   | 55.3   | 0 |
| 0.106173 | 223.1  | 212.3  | 211.3  | 202.9  | 0 |
| 0.064868 | 548.5  | 363.5  | 297.7  | 282.7  | 0 |

|          |        |         |        |        |   |
|----------|--------|---------|--------|--------|---|
| 0.077419 | 173.5  | 50.2    | 53.8   | 49.4   | 0 |
| 0.078818 | 295.9  | 55      | 48.1   | 41.9   | 0 |
| 0.065217 | 1034.1 | 67.4    | 72.4   | 71.2   | 0 |
| 0.049505 | 1823.7 | 1177    | 1426.9 | 1475.9 | 0 |
| 0.098194 | 477.9  | 381.4   | 280.9  | 252.5  | 0 |
| 0.058853 | 1582.2 | 1579    | 1588.8 | 1496   | 0 |
| 0.099196 | 419.9  | 324.6   | 243.6  | 217.8  | 0 |
| 0.065033 | 704.5  | 286.8   | 288.4  | 222.4  | 0 |
| 0.07767  | 686.1  | 81.5    | 75.5   | 58.9   | 0 |
| 0.087397 | 530.1  | 787.2   | 537.8  | 498.1  | 0 |
| 0.000998 | 5034   | 12265.1 | 6392   | *****  | 0 |
| 0.078397 | 1087.7 | 1373.6  | 1017.4 | 343.7  | 0 |

GLITTER!: Age estimates (ma).

| Analysis_# | Pb207/Pb2 | Pb206/U23 | Pb207/U23 | Pb208/Th2 | Pb208/Pb206 |
|------------|-----------|-----------|-----------|-----------|-------------|
| CIL1       | 834.7     | 867.9     | 858.8     | 1093.9    | 0           |
| CIL2       | 793.3     | 771.3     | 777.1     | 863.8     | 0           |
| CIL3       | 3629.4    | 3406.3    | 3548.4    | 3790.5    | 0           |
| CIL4       | 1501.1    | 1111.4    | 1251.5    | 1442.3    | 0           |
| CIL5       | 1166.1    | 238.2     | 348       | 763.5     | 0           |
| CIL6       | 1829.9    | 1794.4    | 1810.9    | 2024.4    | 0           |
| CIL7       | 2584.9    | 16.9      | 61.8      | 21.2      | 0           |
| CIL8       | 361.9     | 240.8     | 252.4     | 308.7     | 0           |
| CIL9       | 137.8     | 18.5      | 19.4      | 24.7      | 0           |
| CIL10      | 470.9     | 542.5     | 528.9     | 608.1     | 0           |
| CIL11      | 894.3     | 752.5     | 788.9     | 1117.4    | 0           |
| CIL12      | 1529.3    | 15.3      | 31.2      | 26.3      | 0           |
| CIL13      | 863.4     | 361.3     | 437.6     | 455.2     | 0           |
| CIL14      | 2516.4    | 2221.3    | 2377.8    | 2281.2    | 0           |
| CIL15      | 2571.2    | 2408      | 2496.5    | 2563      | 0           |
| CIL16      | 348.4     | 214.2     | 225.5     | 226       | 0           |
| CIL17      | 545.6     | 569.4     | 564.1     | 649.9     | 0           |
| CIL18      | 2700.1    | 2624      | 2665.7    | 2712.5    | 0           |
| CIL19      | 1240      | 1141.3    | 1174.6    | 1142.4    | 0           |
| CIL20      | 528.6     | 521.9     | 522.4     | 590.6     | 0           |
| CIL21      | 174.4     | 227       | 222       | 255.1     | 0           |
| CIL22      | 684.1     | 708.3     | 701.3     | 760.9     | 0           |
| CIL23      | 460.3     | 261.3     | 281.7     | 266.7     | 0           |
| CIL24      | 261.5     | 218.3     | 221.4     | 235.8     | 0           |
| CIL25      | 1064.2    | 1091.7    | 1079.9    | 1064.2    | 0           |
| CIL26      | 2080.3    | 1269.9    | 1602.7    | 1585.8    | 0           |
| CIL27      | 2547.9    | 1782.6    | 2159.8    | 1489.2    | 0           |
| CIL28      | 1830      | 1899.8    | 1862.7    | 1827.8    | 0           |
| CIL29      | 2977.2    | 36.6      | 160.6     | 92.2      | 0           |
| CIL30      | 2369.4    | 2365.2    | 2362.5    | 2210.1    | 0           |
| CIL31      | 621.9     | 614.9     | 613.8     | 577.9     | 0           |

|       |        |        |        |        |   |
|-------|--------|--------|--------|--------|---|
| CIL32 | 1209.8 | 1212.2 | 1207   | 1160.9 | 0 |
| CIL33 | 2521.1 | 1866.5 | 2191   | 1566.5 | 0 |
| CIL34 | 1389.9 | 1207.1 | 1269.5 | 1195.2 | 0 |
| CIL35 | 1495.8 | 1496   | 1490.4 | 1055.8 | 0 |
| CIL36 | 912.7  | 1090.4 | 1028   | 952.1  | 0 |
| CIL37 | 974.6  | 999.9  | 986.6  | 657.6  | 0 |
| CIL38 | 1021.2 | 1264.8 | 1171.4 | 1110.6 | 0 |
| CIL39 | 664.8  | 670    | 664.1  | 582.8  | 0 |
| CIL40 | 1290.7 | 1528.4 | 1424.1 | 1365.8 | 0 |
| CIL41 | 461.1  | 511.6  | 498.3  | 535.2  | 0 |
| CIL42 | 1353.8 | 1418.7 | 1384.8 | 1397   | 0 |
| CIL43 | 687.8  | 715.1  | 702.8  | 800.6  | 0 |
| CIL44 | 232.7  | 257.3  | 252.3  | 242.8  | 0 |
| CIL45 | 890.6  | 1228   | 1103.4 | 1090.2 | 0 |
| CIL46 | 2313   | 2704.3 | 2474.6 | 2371.3 | 0 |
| CIL47 | 13.3   | 68.4   | 66     | 207.2  | 0 |
| CIL48 | -37.9  | 256.1  | 226.5  | 206.5  | 0 |
| CIL49 | 1102.2 | 1320.2 | 1229.4 | 1166.4 | 0 |
| CIL50 | 921.6  | 13.3   | 19.7   | 17.3   | 0 |
| CIL51 | -62.7  | 264.2  | 230.3  | 225.7  | 0 |
| CIL52 | 451.6  | 607.6  | 568.2  | 555.4  | 0 |
| CIL53 | 2242.3 | 2139.5 | 2176.4 | 1901.9 | 0 |
| CIL54 | 1538   | 1914.4 | 1725.4 | 1643.7 | 0 |
| CIL55 | 333.1  | 264.1  | 266.7  | 230.9  | 0 |
| CIL56 | 294.2  | 631.8  | 554.5  | 517.6  | 0 |
| CIL57 | -139.5 | 218.3  | 187.1  | 179.4  | 0 |
| CIL58 | 584.7  | 82     | 99.3   | 280    | 0 |
| CIL59 | 412.6  | 15.6   | 18.1   | 12.9   | 0 |
| CIL60 | 1911   | 2166.4 | 2018.5 | 1970   | 0 |
| CIL61 | 11.7   | 581.4  | 477.4  | 928.3  | 0 |
| CIL62 | 515.3  | 338.8  | 361.4  | 373.8  | 0 |
| CIL63 | 201.5  | 315.4  | 301.5  | 311.9  | 0 |
| CIL64 | 136.3  | 214    | 207.3  | 198.4  | 0 |
| CIL65 | 455.5  | 524.4  | 511    | 489.6  | 0 |
| CIL66 | 1634.7 | 1585.5 | 1605.6 | 1521.7 | 0 |
| CIL67 | 299    | 26     | 29.1   | 78.3   | 0 |
| CIL68 | 1770.2 | 1776.3 | 1772.9 | 1697.7 | 0 |
| CIL69 | 592    | 480.2  | 499.9  | 462.5  | 0 |
| CIL70 | 2394.1 | 2057.4 | 2230.7 | 1614.7 | 0 |
| CIL71 | 436.8  | 422    | 424.3  | 386.1  | 0 |
| CIL72 | 155    | 244.8  | 236.6  | 216.6  | 0 |
| CIL73 | 579.6  | 572.7  | 574.3  | 502.7  | 0 |
| CIL74 | 1473.8 | 1415.3 | 1439.7 | 1339   | 0 |
| CIL75 | 896    | 786.4  | 816.3  | 792.6  | 0 |
| CIL76 | 3141   | 142.2  | 567.5  | 256.3  | 0 |
| CIL77 | 1097.7 | 1111.4 | 1107.8 | 931.9  | 0 |
| CIL78 | 570.4  | 715.6  | 682.4  | 561    | 0 |
| CIL79 | 2122.4 | 1813.4 | 1963.4 | 1587.4 | 0 |
| CIL80 | 364.8  | 546.8  | 513.7  | 473.6  | 0 |
| CIL81 | 178.2  | 46.1   | 48.8   | 38.3   | 0 |
| CIL82 | 739.6  | 884.9  | 845.7  | 736.8  | 0 |

|       |       |        |       |       |   |
|-------|-------|--------|-------|-------|---|
| CIL83 | 905.6 | 948.5  | 937   | 791.7 | 0 |
| CIL84 | 837.8 | 915.1  | 894   | 810.3 | 0 |
| CIL85 | 696   | 955.6  | 881.8 | 792.2 | 0 |
| CIL86 | 519.9 | 784.3  | 720   | 654.4 | 0 |
| CIL87 | 482.2 | 683.5  | 639.5 | 552.2 | 0 |
| CIL88 | 730   | 1174.5 | 1030  | 903.2 | 0 |
| CIL89 | 482.2 | 102.3  | 120.1 | 98.9  | 0 |
| CIL90 | 577   | 890.9  | 806.9 | 697.1 | 0 |

GLITTER!: Age estimates (ma).

| Analysis_# | Pb207/Pb2 | Pb206/U23 | Pb207/U23 | Pb208/Th2 | Pb208/Pb206 |
|------------|-----------|-----------|-----------|-----------|-------------|
| BAY1       | -608.3    | 89.6      | 68.9      | 81.9      | 0           |
| BAY2       | 3344.1    | 76.5      | 381.5     | 145.7     | 0           |
| BAY3       | 731.7     | 972.3     | 902.4     | 714.7     | 0           |
| BAY4       | 1972.5    | 97.8      | 231.1     | 152.4     | 0           |
| BAY5       | 2216.9    | 1566      | 1866.3    | 802.5     | 0           |
| BAY6       | -157.8    | 259.3     | 222.2     | 183.3     | 0           |
| BAY7       | -40.6     | 99.7      | 94.4      | 64.8      | 0           |
| BAY8       | 982.3     | 156.2     | 221.1     | 308.6     | 0           |
| BAY9       | -723      | 100.9     | 74.1      | 71        | 0           |
| BAY10      | 575.2     | 969.9     | 857.4     | 683.7     | 0           |
| BAY11      | -195.6    | 205.1     | 176.3     | 149.4     | 0           |
| BAY12      | -52.4     | 79.1      | 75.1      | 52.3      | 0           |
| BAY13      | 238.1     | 227.6     | 228.6     | 217       | 0           |
| BAY14      | 212.6     | 234.9     | 232.9     | 227.8     | 0           |
| BAY15      | 173.9     | 230.1     | 225.2     | 227.9     | 0           |
| BAY16      | 212.1     | 209.2     | 209.4     | 205.7     | 0           |
| BAY17      | 143       | 126.1     | 127       | 125.1     | 0           |
| BAY18      | 195.9     | 87.4      | 91.4      | 86.4      | 0           |
| BAY19      | 1129.2    | 1125.4    | 1126.6    | 1048.4    | 0           |
| BAY20      | 1367.1    | 109       | 189.5     | 132.9     | 0           |
| BAY21      | 126.2     | 102.1     | 103.1     | 109.5     | 0           |
| BAY22      | 229       | 241.2     | 240       | 206.5     | 0           |
| BAY23      | 688.2     | 513.4     | 546.6     | 506.6     | 0           |
| BAY24      | 216.2     | 199.9     | 201.1     | 207       | 0           |
| BAY25      | 61.4      | 35.7      | 36        | 41.9      | 0           |
| BAY26      | 125.7     | 96.7      | 97.8      | 105       | 0           |
| BAY27      | 302.9     | 258.1     | 262.4     | 258.2     | 0           |
| BAY28      | 134.4     | 99.3      | 100.6     | 101.4     | 0           |
| BAY29      | 144.5     | 94        | 95.9      | 94.5      | 0           |
| BAY30      | 553.4     | 500.2     | 509.5     | 502.2     | 0           |
| BAY31      | 327.1     | 188.9     | 199.4     | 195.5     | 0           |
| BAY32      | 301.2     | 281.4     | 283.3     | 290.3     | 0           |
| BAY33      | 322.8     | 202.2     | 211.8     | 209.5     | 0           |
| BAY34      | 181.5     | 149       | 150.9     | 155.9     | 0           |
| BAY35      | 378.5     | 501.2     | 479.4     | 481.6     | 0           |
| BAY36      | 388.5     | 112.4     | 125.7     | 113       | 0           |



|       |        |         |         |        |   |
|-------|--------|---------|---------|--------|---|
| BAY37 | 65.4   | 31.4    | 31.8    | 43.2   | 0 |
| BAY38 | -62.2  | 101.8   | 95.3    | 98.6   | 0 |
| BAY39 | 1263.3 | 1030.9  | 1107.6  | 1144.8 | 0 |
| BAY40 | 641.4  | 594     | 603.5   | 584.9  | 0 |
| BAY41 | 470.5  | 525.2   | 514.8   | 549.6  | 0 |
| BAY42 | 466.2  | 227.1   | 249.3   | 246.1  | 0 |
| BAY43 | 662.7  | 591.2   | 605.9   | 600.6  | 0 |
| BAY44 | 160.2  | 101.4   | 103.7   | 105.6  | 0 |
| BAY45 | 364.8  | 305.6   | 312.3   | 324.3  | 0 |
| BAY46 | 114.5  | 125.1   | 124.4   | 141.8  | 0 |
| BAY47 | 134.4  | 60.5    | 62.3    | 58.1   | 0 |
| BAY48 | 49.7   | 99.7    | 97.6    | 94.6   | 0 |
| BAY49 | #NUM!  | 13894.2 | #VALUE! | *****  | 0 |
| BAY50 | 105.7  | 108.5   | 108.3   | 108.7  | 0 |
| BAY51 | 180.1  | 203.6   | 201.6   | 227.9  | 0 |
| BAY52 | 67.9   | 88.3    | 87.5    | 102.4  | 0 |
| BAY53 | -17.7  | 34.3    | 33.6    | 39.3   | 0 |
| BAY54 | 100.7  | 74.7    | 75.5    | 73.5   | 0 |
| BAY55 | 518.4  | 106.1   | 125.9   | 101.1  | 0 |
| BAY56 | 77.4   | 154.3   | 149.6   | 158.3  | 0 |
| BAY57 | 178.6  | 33.2    | 35.3    | 40.1   | 0 |
| BAY58 | 903.8  | 873.7   | 882.3   | 902.1  | 0 |
| BAY59 | 312    | 97.8    | 106.8   | 97.3   | 0 |
| BAY60 | 563    | 573.8   | 571.8   | 560.7  | 0 |
| BAY61 | 1046.9 | 336.2   | 443.7   | 397.2  | 0 |
| BAY62 | 177.2  | 92.9    | 96.2    | 95.4   | 0 |
| BAY63 | 56.3   | 80.9    | 80.2    | 82.6   | 0 |
| BAY64 | 1263.3 | 1058.3  | 1128.1  | 1095.6 | 0 |
| BAY65 | 28.3   | 80.5    | 78.9    | 88.2   | 0 |
| BAY66 | 255.7  | 246.8   | 247.9   | 210.1  | 0 |
| BAY67 | 1611.2 | 1643.4  | 1630.4  | 1616.8 | 0 |

GLITTER!: Age estimates (ma).

| Rho      | Pb207/Pb2 | Pb206/U23 | Pb207/U23 | Pb208/Th2 | Pb208/Pb2 |
|----------|-----------|-----------|-----------|-----------|-----------|
| 0.023496 | 2338.5    | 1772.2    | 2022.3    | 1993.9    | 0         |
| 0.064503 | 1153      | 1187.1    | 1174.4    | 1255.8    | 0         |
| 0.004651 | 4685.3    | 3286.7    | 3563.3    | 19356.3   | 0         |
| 0.055556 | 551.2     | 520.7     | 526.4     | 536.5     | 0         |
| 0.059652 | 1178.1    | 1179.5    | 1169.1    | 1231.3    | 0         |
| 0.025386 | 1680      | 110.6     | 213.3     | 165.9     | 0         |
| 0.028496 | 1950.1    | 1278.1    | 1530.1    | 1650.6    | 0         |
| 0.041929 | 342.4     | 123.9     | 131.4     | 132.8     | 0         |
| 0.031801 | 1587.9    | 1636      | 1615.8    | 1703      | 0         |
| 0.067138 | 338.6     | 146.3     | 157.8     | 156.2     | 0         |
| 0.052265 | 394.6     | 103.3     | 114.4     | 105.4     | 0         |
| 0.039326 | 445.2     | 120.1     | 135.2     | 124.3     | 0         |
| 0.069792 | 961.4     | 991.4     | 971.9     | 986.2     | 0         |

|          |        |        |        |         |   |
|----------|--------|--------|--------|---------|---|
| 0.06603  | 605.4  | 566.5  | 568.9  | 549.1   | 0 |
| 0.072819 | 936.5  | 866.1  | 861.9  | 1102.1  | 0 |
| 0.036765 | 801    | 113.1  | 148.3  | 132.2   | 0 |
| 0.043459 | 1827.4 | 1412.5 | 1590.4 | 1111.1  | 0 |
| 0.055283 | 481.8  | 324.5  | 339.6  | 331.2   | 0 |
| 0.084455 | 515    | 523.6  | 522.4  | 529.6   | 0 |
| 0.051587 | 455.5  | 85.1   | 99.2   | 87.5    | 0 |
| 0.070513 | 313.3  | 162.1  | 171.8  | 172.1   | 0 |
| 0.064536 | 812.1  | 772.2  | 772.3  | 778.3   | 0 |
| 0.056834 | 935.1  | 872.4  | 869.5  | 893.2   | 0 |
| 0.080645 | 361    | 225.4  | 238.4  | 235.3   | 0 |
| 0.054219 | 1158.5 | 1139.1 | 1117.7 | 1190.1  | 0 |
| 0.066964 | 387.2  | 221.9  | 232.1  | 246.1   | 0 |
| 0.040195 | 2336.6 | 2162.3 | 2251.1 | 2186.6  | 0 |
| 0.019273 | 1960.5 | 123.7  | 279.3  | 69      | 0 |
| 0.065327 | 120.8  | 93.9   | 94.7   | 100.8   | 0 |
| 0.058824 | 227.2  | 96.6   | 100.1  | 99      | 0 |
| 0.054945 | 445.6  | 108.2  | 125.2  | 117.1   | 0 |
| 0.053066 | 708.6  | 317.8  | 361    | 340.1   | 0 |
| 0.035986 | 1868.7 | 1930.5 | 1885.3 | 2009.7  | 0 |
| 0.048491 | 1278.4 | 962.7  | 1057.1 | 971.3   | 0 |
| 0.081006 | 288    | 216.4  | 220.8  | 226.5   | 0 |
| 0.045346 | 1796.1 | 1812.6 | 1813.8 | 1486.2  | 0 |
| 0.002012 | 4850.8 | 4484.3 | 4686.6 | 9412.2  | 0 |
| 0.04918  | 270.4  | 109.6  | 113.1  | 116.3   | 0 |
| 0.068382 | 650.8  | 681.6  | 675.2  | 741.4   | 0 |
| 0.05231  | 539.6  | 538.4  | 542.4  | 557.2   | 0 |
| 0.050445 | 131.5  | 106.5  | 103.8  | 116.7   | 0 |
| 0.051793 | 273.9  | 80.8   | 87.1   | 87.1    | 0 |
| 0.039533 | 955.4  | 999.1  | 983.2  | 1040    | 0 |
| 0.067936 | 1199.5 | 1124.5 | 1148   | 1201.2  | 0 |
| 0.038869 | 324.9  | 109.7  | 114    | 122.9   | 0 |
| 0.028921 | 2466.3 | 2513.5 | 2495.5 | 2644.1  | 0 |
| 0.024737 | 1154   | 1189.9 | 1154.8 | 1235.4  | 0 |
| 0.047702 | 809.5  | 558.8  | 593.7  | 592.7   | 0 |
| 0.047511 | 365.6  | 131.8  | 140.5  | 144.4   | 0 |
| 0.06586  | 370.6  | 353.3  | 355.3  | 389.4   | 0 |
| 0.034468 | 2122.4 | 1105.6 | 1490.8 | 1233.9  | 0 |
| 0.045204 | 691.6  | 548.4  | 561.6  | 564.6   | 0 |
| 0.0368   | 467.8  | 118.3  | 133.7  | 127.3   | 0 |
| 0.05386  | 664.8  | 623.5  | 617.2  | 632.2   | 0 |
| 0.05693  | 1149.9 | 1170.8 | 1160.8 | 1218.1  | 0 |
| 0.00175  | 4908.4 | 4917.6 | 4695   | 27089.8 | 0 |
| 0.040582 | 1757   | 1840.2 | 1791.6 | 1982.9  | 0 |
| 0.082687 | 250.7  | 235.6  | 237    | 257.5   | 0 |
| 0.039604 | 432    | 138.3  | 152    | 154.8   | 0 |
| 0.049839 | 919.2  | 955.8  | 937.4  | 998.3   | 0 |
| 0.063025 | 394.6  | 313    | 315.7  | 334.4   | 0 |
| 0.044964 | 383.1  | 146    | 155.7  | 173.1   | 0 |
| 0.036893 | 646.3  | 109.9  | 137.2  | 122.5   | 0 |
| 0.05     | 262.4  | 89.1   | 92.8   | 91.4    | 0 |

|          |        |        |        |        |   |
|----------|--------|--------|--------|--------|---|
| 0.076923 | 648.7  | 247.3  | 289.9  | 280.4  | 0 |
| 0.074074 | 359.3  | 234.6  | 243.3  | 234.5  | 0 |
| 0.047306 | 960    | 243.8  | 320.2  | 310.3  | 0 |
| 0.048387 | 485.7  | 379.9  | 394.9  | 370.3  | 0 |
| 0.045977 | 598.9  | 101.6  | 120.7  | 133.8  | 0 |
| 0.063091 | 279.2  | 137    | 141.2  | 131.2  | 0 |
| 0.040077 | 1894.4 | 1911.9 | 1911   | 1991.9 | 0 |
| 0.071984 | 328.4  | 263.5  | 262.3  | 270    | 0 |
| 0.033989 | 1964.1 | 2107.1 | 2019.2 | 2108.8 | 0 |
| 0.071567 | 380.6  | 268.7  | 277.9  | 288.8  | 0 |
| 0.040816 | 191.3  | 129.7  | 129.8  | 138.2  | 0 |
| 0.070033 | 372.7  | 307.3  | 308.3  | 322.6  | 0 |
| 0.013919 | 3416.8 | 123.9  | 574.3  | 207.3  | 0 |
| 0.034545 | 1849.2 | 1961   | 1896.2 | 1916.1 | 0 |
| 0.039724 | 1762.1 | 1829.2 | 1797.1 | 1798.3 | 0 |
| 0.043103 | 449.2  | 114.8  | 129.7  | 112.1  | 0 |
| 0.052088 | 1012.8 | 825.6  | 853.7  | 796.4  | 0 |
| 0.025872 | 998.9  | 883.4  | 884.7  | 900.9  | 0 |
| 0.06658  | 746.6  | 723.2  | 714.4  | 755    | 0 |
| 0.037594 | 816.8  | 118.4  | 156.1  | 130.6  | 0 |
| 0.050558 | 975.4  | 920.9  | 927.2  | 915    | 0 |
| 0.043668 | 1712   | 144    | 283.2  | 158.2  | 0 |
| 0.042601 | 1205.3 | 1232.4 | 1193.7 | 1237.3 | 0 |

GLITTER!: Age estimates (ma).

| Rho      | Pb207/Pb2 | Pb206/U23 | Pb207/U23 | Pb208/Th2 | Pb208/Pb2 |
|----------|-----------|-----------|-----------|-----------|-----------|
| 0.036018 | 2505.9    | 1184.2    | 1762.7    | 773.5     | 0         |
| 0.081287 | 642.1     | 599.6     | 612.9     | 617.8     | 0         |
| 0.0837   | 305.5     | 122.2     | 133.3     | 137.4     | 0         |
| 0.050937 | 1231.6    | 1139.7    | 1165.6    | 1187.8    | 0         |
| 0.061386 | 673.1     | 565.8     | 583.2     | 564.6     | 0         |
| 0.044076 | 1771.5    | 1710.9    | 1743.5    | 1671.8    | 0         |
| 0.042553 | 1872.5    | 34        | 82.7      | 67.4      | 0         |
| 0.05     | 268.6     | 154.6     | 160.7     | 153.4     | 0         |
| 0.069767 | 128.6     | 107.7     | 109.8     | 104       | 0         |
| 0.100264 | 329.2     | 246.4     | 255.8     | 439.8     | 0         |
| 0.075356 | 285.4     | 231       | 239.5     | 222.1     | 0         |
| 0.047829 | 1158.5    | 1068.2    | 1084.6    | 1007.7    | 0         |
| 0.054726 | 211.2     | 122.9     | 127.7     | 120.3     | 0         |
| 0.08142  | 989       | 492.1     | 597.2     | 524.7     | 0         |
| 0.00424  | 4618.9    | 1311.4    | 3076.6    | 1980.2    | 0         |
| 0.046434 | 319.4     | 148.4     | 157.4     | 142.2     | 0         |
| 0.083065 | 852.9     | 790.2     | 815.6     | 758.1     | 0         |
| 0.055755 | 993       | 912.2     | 931.6     | 859.1     | 0         |
| 0.053367 | 279.7     | 234.5     | 236.7     | 222.7     | 0         |
| 0.037338 | 590.2     | 106.5     | 129.4     | 113.1     | 0         |

|          |        |        |        |         |   |
|----------|--------|--------|--------|---------|---|
| 0.03005  | 2286.4 | 99     | 268.9  | 211.3   | 0 |
| 0.074394 | 377.3  | 262.5  | 271.2  | 410.2   | 0 |
| 0.071429 | 275.3  | 149.7  | 159    | 145.6   | 0 |
| 0.097173 | 386.8  | 345.7  | 355.2  | 346.9   | 0 |
| 0.045825 | 1322.4 | 1245.7 | 1278.1 | 1170.3  | 0 |
| 0.055637 | 370.2  | 214.7  | 230    | 203.5   | 0 |
| 0.079439 | 263.3  | 209.7  | 212.1  | 197.9   | 0 |
| 0.028401 | 1734.7 | 192.1  | 372.2  | 345.3   | 0 |
| 0.049875 | 996.1  | 110.9  | 159.1  | 105.4   | 0 |
| 0.091387 | 561.6  | 533.1  | 540.8  | 505.8   | 0 |
| 0.095101 | 262.4  | 204.1  | 212    | 192.9   | 0 |
| 0.086694 | 333.1  | 266.3  | 272.5  | 251.3   | 0 |
| 0.076568 | 501.6  | 496.5  | 494.3  | 463.6   | 0 |
| 0.062891 | 1046.6 | 995.3  | 1012.6 | 924.3   | 0 |
| 0.002244 | 4925.9 | 4606.2 | 4824.6 | 8348.4  | 0 |
| 0.068493 | 155.5  | 31.9   | 34.1   | 31.9    | 0 |
| 0.090909 | 739.3  | 633.1  | 655.1  | 802.8   | 0 |
| 0.071972 | 1139.2 | 843.3  | 936.7  | 846.3   | 0 |
| 0.101493 | 279.2  | 211.5  | 219.1  | 197.1   | 0 |
| 0.043684 | 425.6  | 183    | 194.6  | 200.5   | 0 |
| 0.053156 | 534.3  | 83.8   | 100.2  | 86.1    | 0 |
| 0.079365 | 181.5  | 89.4   | 93.6   | 87.9    | 0 |
| 0.072965 | 1253.4 | 1005.8 | 1088.9 | 1029.6  | 0 |
| 0.057143 | 424    | 112.7  | 125.1  | 113.7   | 0 |
| 0.030055 | 529    | 35.3   | 42.5   | 34.1    | 0 |
| 0.055412 | 313.3  | 235    | 240.7  | 223.9   | 0 |
| 0.052159 | 1778.4 | 1715   | 1722.4 | 1646.3  | 0 |
| 0.053571 | 335.2  | 80.7   | 89.8   | 77.1    | 0 |
| 0.038194 | 1838.4 | 838.8  | 1147.9 | 1413.4  | 0 |
| 0.084228 | 681    | 605.2  | 625.8  | 568.4   | 0 |
| 0.095876 | 571.5  | 556.7  | 565.6  | 521.4   | 0 |
| 0.028009 | 1716.2 | 1099.2 | 1343.4 | 1035    | 0 |
| 0.072472 | 754.5  | 742.1  | 731.9  | 705.3   | 0 |
| 0.0522   | 1718   | 1533.7 | 1603.6 | 1446.9  | 0 |
| 0.077093 | 800    | 211.8  | 269.1  | 238.9   | 0 |
| 0.043993 | 84.9   | 115.4  | 114.3  | 110.5   | 0 |
| 0.065103 | 913.9  | 906.1  | 898.8  | 888.9   | 0 |
| 0.09375  | 132.4  | 107.5  | 108.8  | 106     | 0 |
| 0.074004 | 658.5  | 230.1  | 272.6  | 264.1   | 0 |
| 0.075334 | 402.4  | 355.5  | 364.9  | 335.7   | 0 |
| 0.083146 | 344.1  | 215.2  | 232.2  | 214.3   | 0 |
| 0.057508 | 1089.5 | 808.4  | 880.4  | 843.4   | 0 |
| 0.064977 | 685.1  | 560    | 574.4  | 516     | 0 |
| 0.078579 | 447.6  | 422.6  | 426.6  | 395.3   | 0 |
| 0.031315 | 523.3  | 100.7  | 120    | 107     | 0 |
| 0.042084 | 902.3  | 873.6  | 877    | 913.3   | 0 |
| 0.002247 | 4909.4 | 4283.8 | 4719.8 | 12878.4 | 0 |
| 0.033133 | 1063.4 | 871.5  | 934    | 894.5   | 0 |
| 0.034126 | 292.4  | 106    | 110.9  | 119.3   | 0 |
| 0.045498 | 1530.3 | 268.6  | 453.3  | 190.3   | 0 |
| 0.083537 | 972.6  | 964.7  | 977.5  | 980.2   | 0 |

|          |        |        |        |        |   |
|----------|--------|--------|--------|--------|---|
| 0.043632 | 636.4  | 564.2  | 585.3  | 569.6  | 0 |
| 0.064548 | 1122   | 1085.3 | 1102.1 | 1085   | 0 |
| 0.044944 | 821.2  | 115.8  | 152.4  | 126.7  | 0 |
| 0.036408 | 2296.1 | 2246.4 | 2247.6 | 2302.3 | 0 |
| 0.077922 | 108.6  | 33.8   | 35.1   | 33.9   | 0 |
| 0.052842 | 1330.7 | 1132.4 | 1187.2 | 1454.8 | 0 |
| 0.025928 | 2462.8 | 2353.9 | 2407.9 | 2360.7 | 0 |
| 0.07923  | 1044.2 | 979.2  | 1003   | 978.5  | 0 |
| 0.041979 | 237.2  | 116.8  | 117.9  | 116.3  | 0 |
| 0.077531 | 677.6  | 603.3  | 624.6  | 685.2  | 0 |
| 0.062424 | 371.5  | 274.2  | 285.8  | 272.8  | 0 |
| 0.060572 | 1011.5 | 873    | 908.8  | 917.5  | 0 |
| 0.069015 | 572.6  | 527.7  | 529.8  | 542.4  | 0 |
| 0.043758 | 1141.3 | 1114.7 | 1094.9 | 1091.2 | 0 |

GLITTER!: Age estimates (ma).

| Rho      | Pb207/Pb2 | Pb206/U23 | Pb207/U23 | Pb208/Th2 | Pb208/Pb2 |
|----------|-----------|-----------|-----------|-----------|-----------|
| 0.069246 | 835.6     | 158.9     | 155.6     | 115.5     | 0         |
| 0.127358 | 162.6     | 168.9     | 167       | 141.2     | 0         |
| 0.118881 | 173       | 209.8     | 210.2     | 183.2     | 0         |
| 0.039805 | 2542.5    | 3240.2    | 2479.7    | 2040.2    | 0         |
| 0.0841   | 552.6     | 334.8     | 264       | 214.6     | 0         |
| 0.099631 | 283.7     | 159.7     | 164.4     | 141.3     | 0         |
| 0.089096 | 358.5     | 346.4     | 249.9     | 218.9     | 0         |
| 0.143678 | 207.5     | 293.5     | 203.8     | 182.9     | 0         |
| 0.097057 | 1070.4    | 1550.2    | 1069.2    | 920.7     | 0         |
| 0.083719 | 1105.8    | 1506.8    | 1093.3    | 913       | 0         |
| 0.111111 | 228.1     | 51        | 55.1      | 29.9      | 0         |
| 0.110032 | 197.8     | 203.8     | 202.9     | 177       | 0         |
| 0.053915 | 926.6     | 571.1     | 488.7     | 364.7     | 0         |
| 0.064287 | 1146.4    | 1536.8    | 1102.8    | 966.7     | 0         |
| 0.108753 | 517.6     | 492.9     | 503.7     | 296.1     | 0         |
| 0.082508 | 649.1     | 102.6     | 88.2      | 70.5      | 0         |
| 0.084136 | 1025.6    | 1421.6    | 1018.2    | 893.7     | 0         |
| 0.085956 | 1035.5    | 1185.7    | 962.7     | 849.6     | 0         |
| 0.12798  | 563       | 586.9     | 438.5     | 375.5     | 0         |
| 0.066697 | 1163.3    | 1530.3    | 1111.8    | 987.5     | 0         |
| 0.168317 | 146.4     | 206.1     | 203.5     | 189.9     | 0         |
| 0.061572 | 1614.8    | 2136.6    | 1572      | 1395.7    | 0         |
| 0.099415 | 271.3     | 90.9      | 97.3      | 92.1      | 0         |
| 0.133644 | 692.3     | 955.9     | 667.4     | 612.2     | 0         |
| 0.125475 | 431.2     | 549.1     | 393       | 357.3     | 0         |
| 0.101243 | 667.5     | 300.9     | 248.7     | 234.8     | 0         |
| 0.080152 | 1586.8    | 1865.2    | 1558.9    | 1420      | 0         |
| 0.076937 | 1595.9    | 2135.6    | 1546.8    | 1401.5    | 0         |
| 0.099217 | 554.1     | 214.2     | 243.8     | 228.1     | 0         |
| 0.031602 | 2628      | 3085.5    | 2454.2    | 2048.2    | 0         |

|          |        |        |        |        |   |
|----------|--------|--------|--------|--------|---|
| 0.062044 | 954    | 84.9   | 124.8  | 58.2   | 0 |
| 0.096535 | 435.2  | 215    | 235.3  | 221.5  | 0 |
| 0.118348 | 582.2  | 790.3  | 541.5  | 507.3  | 0 |
| 0.092777 | 1054.2 | 1475.6 | 1032.5 | 962.4  | 0 |
| 0.115355 | 564.1  | 784.2  | 546.4  | 501.9  | 0 |
| 0.113575 | 1039   | 2456.8 | 1769.2 | 1619.5 | 0 |
| 0.0818   | 729.7  | 173.1  | 154.1  | 116.9  | 0 |
| 0.071429 | 1160.8 | 120.8  | 137.5  | 99.8   | 0 |
| 0.051821 | 1316   | 1584.3 | 1172   | 1102.3 | 0 |
| 0.129386 | 259.7  | 307.1  | 214.1  | 202    | 0 |
| 0.062323 | 1563.2 | 2091.9 | 1543   | 1440.5 | 0 |
| 0.120842 | 663.4  | 923.2  | 652.7  | 771.4  | 0 |
| 0.10793  | 400.8  | 267.9  | 285.6  | 267.4  | 0 |
| 0.079486 | 1255.8 | 1624.9 | 1187.5 | 1150.7 | 0 |
| 0.062885 | 1732.9 | 2313.5 | 1676.4 | 1592.7 | 0 |
| 0.072183 | 964.6  | 167.9  | 169.5  | 150.7  | 0 |
| 0.136986 | 297.7  | 219.2  | 226.9  | 171.1  | 0 |
| 0.109195 | 224.9  | 100.2  | 106.2  | 100.4  | 0 |
| 0.083144 | 356.4  | 371.5  | 369.8  | 357.3  | 0 |
| 0.08     | 929.5  | 49.1   | 50.1   | 42.3   | 0 |
| 0.115473 | 330.1  | 264.4  | 267.5  | 247.4  | 0 |
| 0.084211 | 1147.1 | 214.5  | 317.6  | 190.5  | 0 |
| 0.071337 | 826.9  | 768.8  | 594.9  | 547    | 0 |
| 0.080706 | 1456.2 | 319.5  | 359.3  | 363.7  | 0 |
| 0.078029 | 791.1  | 147.3  | 134.9  | 105.9  | 0 |
| 0.064095 | 1174.1 | 1579.1 | 1148.2 | 1076.1 | 0 |
| 0.072792 | 1029.1 | 1031.1 | 1029.2 | 989.2  | 0 |
| 0.082524 | 776.6  | 134.5  | 123.8  | 105    | 0 |
| 0.090218 | 971.5  | 957.9  | 965.6  | 622.1  | 0 |
| 0.114735 | 738    | 968.7  | 697    | 676.8  | 0 |
| 0.098472 | 435.6  | 298.9  | 313.3  | 301.6  | 0 |
| 0.072415 | 1050.7 | 1051.1 | 1033.3 | 976.6  | 0 |
| 0.075197 | 554.1  | 600.7  | 560.8  | 347.4  | 0 |
| 0.068623 | 1590.2 | 2221   | 1575.3 | 1478.6 | 0 |
| 0.058397 | 1760.5 | 2371.6 | 1736.3 | 1565.1 | 0 |
| 0.048127 | 1877.5 | 1856   | 1869.4 | 1496.4 | 0 |
| 0.107981 | 246.7  | 232    | 230.3  | 204.6  | 0 |
| 0.084615 | 962    | 95.8   | 96.6   | 70     | 0 |
| 0.058416 | 1965   | 2604.9 | 1911.5 | 1702.3 | 0 |
| 0.089812 | 830    | 938.9  | 700.2  | 623.5  | 0 |
| 0.067485 | 923.9  | 144.8  | 140.5  | 108.7  | 0 |
| 0.096376 | 850.5  | 1093.5 | 796.3  | 729.5  | 0 |
| 0.091483 | 476    | 289.4  | 308.8  | 295.7  | 0 |
| 0.10705  | 184.7  | 207    | 207.4  | 192.9  | 0 |
| 0.066554 | 1117.6 | 1547   | 1106.5 | 1037.3 | 0 |
| 0.085174 | 78.9   | 124.6  | 121.6  | 117.6  | 0 |
| 0.095238 | 815.5  | 1213.3 | 834.8  | 798    | 0 |
| 0.079012 | 848.6  | 770.3  | 793.2  | 758.9  | 0 |
| 0.115658 | 461.1  | 614.7  | 438.5  | 393.3  | 0 |
| 0.027397 | 3175.3 | 233.8  | 633.7  | 421.6  | 0 |
| 0.082938 | 972.6  | 150.6  | 150.3  | 125.9  | 0 |

|          |        |        |        |        |   |
|----------|--------|--------|--------|--------|---|
| 0.081777 | 465    | 565.5  | 446.6  | 406.3  | 0 |
| 0.041426 | 2304.8 | 2488   | 2049   | 2143   | 0 |
| 0.087692 | 305.9  | 271.8  | 277.9  | 262    | 0 |
| 0.067723 | 900.2  | 163.6  | 161.6  | 124.8  | 0 |
| 0.087315 | 275.7  | 252.4  | 255.4  | 243.4  | 0 |
| 0.088292 | 278.8  | 218.2  | 222.4  | 207.3  | 0 |
| 0.073482 | 860.3  | 164.8  | 153.8  | 134.2  | 0 |
| 0.068889 | 1193.5 | 1840.6 | 1302   | 1204.3 | 0 |
| 0.07907  | 536.2  | 560.8  | 553.9  | 549.2  | 0 |
| 0.070638 | 1149.4 | 343.2  | 326.2  | 272.4  | 0 |
| 0.021816 | 2590.8 | 2225   | 2429.7 | 2611.3 | 0 |
| 0.088942 | 194.5  | 172.7  | 176    | 161    | 0 |
| 0.062364 | 1582   | 2229.9 | 1606.5 | 1421.9 | 0 |
| 0.08143  | 785    | 819.2  | 605.1  | 521.7  | 0 |
| 0.089069 | 393    | 173.9  | 138.3  | 117.6  | 0 |
| 0.077485 | 252.5  | 245.1  | 253.1  | 224.9  | 0 |
| 0.0982   | 614.7  | 805.6  | 571    | 514.5  | 0 |
| 0.076271 | 128.1  | 79.9   | 80.8   | 47.2   | 0 |
| 0.084063 | 212.1  | 221.7  | 219.6  | 194.1  | 0 |
| 0.097619 | 404.1  | 541.7  | 387.3  | 325.4  | 0 |
| 0.079268 | 193.6  | 179.9  | 182.5  | 154.4  | 0 |
| 0.043845 | 2119.8 | 54.2   | 102.4  | 58.8   | 0 |
| 0.077659 | 788.2  | 864.1  | 647.4  | 552.7  | 0 |
| 0.068947 | 1025.8 | 1541.8 | 1074   | 968.5  | 0 |
| 0.072423 | 356    | 228.7  | 233.8  | 259.7  | 0 |
| 0.080097 | 680.7  | 124.1  | 109.3  | 80.6   | 0 |
| 0.075851 | 231.3  | 218.6  | 217.5  | 202    | 0 |
| 0.058063 | 854.8  | 916.8  | 896.2  | 832    | 0 |
| 0.050658 | 1129.7 | 1181.9 | 1159.3 | 1066.2 | 0 |
| 0.027086 | 2833.7 | 3393.5 | 2687.5 | 2187.4 | 0 |
| 0.055368 | 929.2  | 924.3  | 933.5  | 838.6  | 0 |
| 0.068966 | 384.3  | 222.6  | 235.7  | 208.1  | 0 |
| 0.099078 | 92.4   | 177.1  | 126.4  | 108.4  | 0 |
| 0.073529 | 385.2  | 74.8   | 61.6   | 46.5   | 0 |
| 0.088899 | 481.4  | 812.7  | 549.2  | 493.7  | 0 |
| 0.078989 | 122.3  | 222.5  | 213.7  | 138.4  | 0 |
| 0.073846 | 91.4   | 106.7  | 106.7  | 94.2   | 0 |
| 0.048505 | 839.3  | 1032.6 | 939.3  | 842.3  | 0 |
| 0.027845 | 2138.7 | 2592.9 | 2354.9 | 1976.8 | 0 |

GLITTER!: Age estimates: 1 sigma uncertainty (ma).

| Th232/U23 | U238/Si29 | Pb207/Pb2 | Pb206/U23 | Pb207/U23 | Pb208/Th2 | Pb208/Pb2 |
|-----------|-----------|-----------|-----------|-----------|-----------|-----------|
| 0         | 0         | 29.26     | 11.52     | 14.65     | 12.64     | 0         |
| 0         | 0         | 29.8      | 6.67      | 7.98      | 8.17      | 0         |
| 0         | 0         | 20.53     | 17.77     | 12.49     | 19.35     | 0         |
| 0         | 0         | 32.73     | 3.54      | 4.75      | 3.61      | 0         |
| 0         | 0         | 25.83     | 13.12     | 14.21     | 13.45     | 0         |
| 0         | 0         | 25.29     | 9.46      | 9.4       | 9.77      | 0         |
| 0         | 0         | 34.79     | 6.83      | 41.62     | 28.99     | 0         |
| 0         | 0         | 32.32     | 6.73      | 36.59     | 9.06      | 0         |
| 0         | 0         | 86.6      | 1.24      | 4.25      | 2.09      | 0         |
| 0         | 0         | 27.04     | 8.22      | 8.87      | 8.69      | 0         |
| 0         | 0         | 96.44     | 1.28      | 4.36      | 1.85      | 0         |
| 0         | 0         | 43.05     | 1.02      | 1.7       | 1.4       | 0         |
| 0         | 0         | 26.89     | 6.87      | 7.42      | 7.74      | 0         |
| 0         | 0         | 21.39     | 17.11     | 12.74     | 18.92     | 0         |
| 0         | 0         | 133.15    | 0.99      | 3.71      | 1.62      | 0         |
| 0         | 0         | 86.93     | 0.82      | 2.91      | 1.59      | 0         |
| 0         | 0         | 30.36     | 5.97      | 7.16      | 7.83      | 0         |
| 0         | 0         | 31.42     | 10.39     | 13.17     | 12.62     | 0         |
| 0         | 0         | 24.95     | 11.71     | 11.11     | 13        | 0         |
| 0         | 0         | 109.87    | 1.31      | 4.62      | 2.23      | 0         |
| 0         | 0         | 96.53     | 1.27      | 4.11      | 2.31      | 0         |
| 0         | 0         | 22.47     | 5.49      | 23.66     | 52.68     | 0         |
| 0         | 0         | 51.51     | 1.73      | 4.26      | 2.25      | 0         |
| 0         | 0         | 44.81     | 1.04      | 1.9       | 1.37      | 0         |
| 0         | 0         | 47.19     | 1.78      | 11.22     | 4.05      | 0         |
| 0         | 0         | 23.16     | 14.13     | 11.83     | 17.19     | 0         |
| 0         | 0         | 31.09     | 6.41      | 7.74      | 7.66      | 0         |
| 0         | 0         | 35.77     | 6.66      | 9.3       | 7.31      | 0         |
| 0         | 0         | 65.58     | 1.18      | 3.31      | 1.67      | 0         |
| 0         | 0         | 24.96     | 12.41     | 11.26     | 13.42     | 0         |
| 0         | 0         | 21.15     | 15.63     | 12.11     | 19.31     | 0         |
| 0         | 0         | 35.37     | 5.44      | 7.39      | 7.3       | 0         |
| 0         | 0         | 26.96     | 12.55     | 12.77     | 15.84     | 0         |
| 0         | 0         | 35.72     | 6.11      | 8.46      | 6.87      | 0         |
| 0         | 0         | 56.86     | 3.56      | 7.33      | 4.66      | 0         |
| 0         | 0         | 19.16     | 17.53     | 12.85     | 21.98     | 0         |
| 0         | 0         | 43.66     | 7.2       | 12.76     | 10.29     | 0         |
| 0         | 0         | 19.95     | 10.17     | 25.78     | 14.6      | 0         |
| 0         | 0         | 33.55     | 6.68      | 8.66      | 7.94      | 0         |



|   |   |       |         |       |        |   |
|---|---|-------|---------|-------|--------|---|
| 0 | 0 | 79.75 | 0.95    | 3.06  | 1.28   | 0 |
| 0 | 0 | 25.89 | 11.69   | 11.12 | 14.48  | 0 |
| 0 | 0 | 34.07 | 13.45   | 18.22 | 16.28  | 0 |
| 0 | 0 | 24.59 | 11.05   | 9.84  | 12.19  | 0 |
| 0 | 0 | 41    | 6.8     | 10.45 | 9.17   | 0 |
| 0 | 0 | 49.55 | 1.05    | 1.95  | 1.27   | 0 |
| 0 | 0 | 0     | 1850.65 | ***** | -NaN   | 0 |
| 0 | 0 | 42.09 | 7.57    | 15.44 | 11.52  | 0 |
| 0 | 0 | 17.91 | 15.76   | 14.16 | 15.1   | 0 |
| 0 | 0 | 27.25 | 4.83    | 6.66  | 4.9    | 0 |
| 0 | 0 | 90.7  | 0.83    | 3.33  | 1.43   | 0 |
| 0 | 0 | 35.73 | 4.4     | 9.1   | 6.08   | 0 |
| 0 | 0 | 58.27 | 3.46    | 9.79  | 5.88   | 0 |
| 0 | 0 | 73.58 | 1.29    | 6.95  | 3.5    | 0 |
| 0 | 0 | 26.96 | 4.13    | 5.43  | 4.49   | 0 |
| 0 | 0 | 35.5  | 3.53    | 18.53 | 15.3   | 0 |
| 0 | 0 | 23.33 | 3.27    | 22.53 | 46.25  | 0 |
| 0 | 0 | 36.11 | 5.35    | 10.41 | 8.12   | 0 |
| 0 | 0 | 77.83 | 0.95    | 3.25  | 1.62   | 0 |
| 0 | 0 | 78.51 | 1.06    | 3.77  | 1.76   | 0 |
| 0 | 0 | 52.66 | 1.91    | 10    | 3.86   | 0 |
| 0 | 0 | 46.82 | 0.98    | 2.7   | 1.41   | 0 |
| 0 | 0 | 28.08 | 2.49    | 3.47  | 2.44   | 0 |
| 0 | 0 | 86.8  | 1.09    | 4.29  | 1.88   | 0 |
| 0 | 0 | 35.65 | 8.84    | 19.91 | 8.96   | 0 |
| 0 | 0 | 29.14 | 7.2     | 12.63 | 11.16  | 0 |
| 0 | 0 | 32.76 | 2       | 3.4   | 2.36   | 0 |
| 0 | 0 | 18.96 | 13      | 11.85 | 13.79  | 0 |
| 0 | 0 | 51.76 | 0.77    | 2.06  | 1.16   | 0 |
| 0 | 0 | 31.79 | 9.36    | 17.04 | 12.26  | 0 |
| 0 | 0 | 24.16 | 4.06    | 4.42  | 5.7    | 0 |
| 0 | 0 | 40.31 | 0.74    | 1.73  | 0.81   | 0 |
| 0 | 0 | 32.4  | 3.91    | 6.66  | 5.36   | 0 |
| 0 | 0 | 21.99 | 7.13    | 7.08  | 7.73   | 0 |
| 0 | 0 | 32.61 | 0.97    | 3.85  | 1.93   | 0 |
| 0 | 0 | 22.85 | 12.46   | 51.49 | 110.28 | 0 |
| 0 | 0 | 29.52 | 2.17    | 3.22  | 3.23   | 0 |
| 0 | 0 | 54.32 | 2.05    | 5.86  | 2.98   | 0 |
| 0 | 0 | 75.33 | 1.03    | 3.73  | 1.51   | 0 |
| 0 | 0 | 76.54 | 0.8     | 3.05  | 1.8    | 0 |

GLITTER!: Age estimates: 1 sigma uncertainty (ma).

| Th232/U23 | U238/Si29 | Pb207/Pb2 | Pb206/U23 | Pb207/U23 | Pb208/Th2 | Pb208/Pb2 |
|-----------|-----------|-----------|-----------|-----------|-----------|-----------|
| 0         | 0         | 14.15     | 75.43     | 113.44    | 176.85    | 0         |
| 0         | 0         | 70.53     | 5.32      | 9.38      | 7.3       | 0         |
| 0         | 0         | 65.24     | 2.26      | 3.39      | 1.95      | 0         |

|   |   |        |       |       |       |   |
|---|---|--------|-------|-------|-------|---|
| 0 | 0 | 10.23  | 21.7  | 13.47 | 9.66  | 0 |
| 0 | 0 | 27.57  | 2.92  | 3.03  | 1.76  | 0 |
| 0 | 0 | 92.63  | 1.79  | 2.98  | 1.55  | 0 |
| 0 | 0 | 65.02  | 0.77  | 1.32  | 0.78  | 0 |
| 0 | 0 | 7.74   | 27.96 | 7.78  | 7.52  | 0 |
| 0 | 0 | 18.87  | 5.18  | 5.19  | 3.22  | 0 |
| 0 | 0 | 31.26  | 2.36  | 3.07  | 3.29  | 0 |
| 0 | 0 | 16.17  | 5.92  | 5.22  | 4.39  | 0 |
| 0 | 0 | 62     | 0.64  | 1.24  | 0.64  | 0 |
| 0 | 0 | 29.81  | 0.46  | 0.58  | 0.19  | 0 |
| 0 | 0 | 62.88  | 1.41  | 1.96  | 0.95  | 0 |
| 0 | 0 | 79.23  | 1.29  | 2.21  | 1.33  | 0 |
| 0 | 0 | 59.46  | 1.12  | 2.05  | 1.09  | 0 |
| 0 | 0 | 48.63  | 0.65  | 1.1   | 0.56  | 0 |
| 0 | 0 | 37.67  | 3.82  | 4.26  | 2.3   | 0 |
| 0 | 0 | 45.28  | 22.01 | 51.75 | 16.73 | 0 |
| 0 | 0 | 26.45  | 8.16  | 10.2  | 8.32  | 0 |
| 0 | 0 | 51.3   | 0.73  | 1.41  | 0.93  | 0 |
| 0 | 0 | 67.46  | 1     | 1.83  | 1.13  | 0 |
| 0 | 0 | 61.91  | 1.05  | 1.85  | 1.12  | 0 |
| 0 | 0 | 66.63  | 0.94  | 1.7   | 1.14  | 0 |
| 0 | 0 | 50.17  | 1.6   | 1.85  | 1.21  | 0 |
| 0 | 0 | 71.36  | 1.39  | 2.8   | 1.74  | 0 |
| 0 | 0 | 12.47  | 18    | 10.94 | 13.82 | 0 |
| 0 | 0 | 46.08  | 2     | 2.15  | 1.58  | 0 |
| 0 | 0 | 30.91  | 2.9   | 3.71  | 2.74  | 0 |
| 0 | 0 | 11.4   | 15.85 | 11.73 | 13.73 | 0 |
| 0 | 0 | 50.57  | 5.21  | 9.45  | 5.93  | 0 |
| 0 | 0 | 48.7   | 4.77  | 6.28  | 4.28  | 0 |
| 0 | 0 | 21.81  | 2.2   | 2.59  | 11.22 | 0 |
| 0 | 0 | 96.04  | 1.5   | 3.47  | 1.96  | 0 |
| 0 | 0 | 32.44  | 3.56  | 5.63  | 5.85  | 0 |
| 0 | 0 | 20.89  | 2.36  | 2.31  | 1.82  | 0 |
| 0 | 0 | 22.01  | 8.09  | 6.27  | 6.07  | 0 |
| 0 | 0 | 93.09  | 1.17  | 2.42  | 1.75  | 0 |
| 0 | 0 | 11.42  | 30.4  | 14.54 | 18.34 | 0 |
| 0 | 0 | 47.08  | 0.85  | 1.53  | 1.24  | 0 |
| 0 | 0 | 28.72  | 2.4   | 3.36  | 4.14  | 0 |
| 0 | 0 | 78.37  | 1.18  | 2.35  | 1.38  | 0 |
| 0 | 0 | 65.62  | 1.02  | 1.76  | 1.21  | 0 |
| 0 | 0 | 35.36  | 4.46  | 4.78  | 3.92  | 0 |
| 0 | 0 | 21.98  | 5.36  | 5.69  | 6.43  | 0 |
| 0 | 0 | 44.67  | 4.79  | 6.29  | 4.91  | 0 |
| 0 | 0 | 69.27  | 1.06  | 2.05  | 1.33  | 0 |
| 0 | 0 | 26.11  | 3.32  | 3.79  | 3.09  | 0 |
| 0 | 0 | 17.19  | 12.21 | 10.85 | 17.75 | 0 |
| 0 | 0 | 51.75  | 1.03  | 1.64  | 1.12  | 0 |
| 0 | 0 | 52.74  | 2.61  | 4.65  | 3.41  | 0 |
| 0 | 0 | 110.05 | 1.82  | 3.83  | 2.77  | 0 |
| 0 | 0 | 28.52  | 2.65  | 3.34  | 4.3   | 0 |
| 0 | 0 | 69.88  | 6.15  | 11.79 | 11.38 | 0 |

|   |   |        |        |        |        |   |
|---|---|--------|--------|--------|--------|---|
| 0 | 0 | 59.59  | 0.76   | 1.49   | 1.31   | 0 |
| 0 | 0 | 89.14  | 1.04   | 1.97   | 1.58   | 0 |
| 0 | 0 | 105.49 | 1.69   | 3.92   | 3.1    | 0 |
| 0 | 0 | 16.19  | 13.44  | 12.58  | 28.21  | 0 |
| 0 | 0 | 43.32  | 5.26   | 6.82   | 6.3    | 0 |
| 0 | 0 | 16.56  | 17.52  | 12.52  | 29.07  | 0 |
| 0 | 0 | 43.41  | 4.52   | 5.96   | 5.29   | 0 |
| 0 | 0 | 47.91  | 4.27   | 8.11   | 6.02   | 0 |
| 0 | 0 | 77.1   | 1.53   | 2.91   | 1.93   | 0 |
| 0 | 0 | 37.76  | 10.34  | 12.38  | 12.73  | 0 |
| 0 | 0 | 21.3   | 152.55 | 297.66 | 525.41 | 0 |
| 0 | 0 | 23.15  | 16.22  | 14.79  | 7.95   | 0 |

GLITTER!: Age estimates: 1 sigma uncertainty (ma).

GLITTER!: N

| Analysis_# | Pb207/Pb206 | Pb206/U235 | Pb207/U235 | Pb208/Th232 | Pb208/Pb206 | Analysis_# |
|------------|-------------|------------|------------|-------------|-------------|------------|
| CIL1       | 82.57       | 20.28      | 22.02      | 74.19       | 0           | CIL1       |
| CIL2       | 32.58       | 10.83      | 7.65       | 52.34       | 0           | CIL2       |
| CIL3       | 19.43       | 39.08      | 11.46      | 164.99      | 0           | CIL3       |
| CIL4       | 35.39       | 17.14      | 12.01      | 74.73       | 0           | CIL4       |
| CIL5       | 240.27      | 16.59      | 32.43      | 290.44      | 0           | CIL5       |
| CIL6       | 64.78       | 43.33      | 26.41      | 119.35      | 0           | CIL6       |
| CIL7       | 212.66      | 1.8        | 8.33       | 8.04        | 0           | CIL7       |
| CIL8       | 64.33       | 4.45       | 5.91       | 22.21       | 0           | CIL8       |
| CIL9       | 515.47      | 2.2        | 7.63       | 9.4         | 0           | CIL9       |
| CIL10      | 77.7        | 11.33      | 13.16      | 35.44       | 0           | CIL10      |
| CIL11      | 43.18       | 12.05      | 10.52      | 70.65       | 0           | CIL11      |
| CIL12      | 347.9       | 1.61       | 6.27       | 8.16        | 0           | CIL12      |
| CIL13      | 102.67      | 10.3       | 16.36      | 39.18       | 0           | CIL13      |
| CIL14      | 31.04       | 33         | 15.03      | 122.72      | 0           | CIL14      |
| CIL15      | 23.63       | 30.15      | 12.24      | 126.41      | 0           | CIL15      |
| CIL16      | 77.02       | 4.41       | 6.35       | 22.65       | 0           | CIL16      |
| CIL17      | 56.67       | 10.09      | 10.55      | 43.29       | 0           | CIL17      |
| CIL18      | 25.58       | 33.7       | 13.48      | 141.48      | 0           | CIL18      |
| CIL19      | 54.53       | 22.21      | 17.79      | 70.73       | 0           | CIL19      |
| CIL20      | 47.3        | 8.38       | 8.14       | 37.77       | 0           | CIL20      |
| CIL21      | 69.21       | 4.26       | 5.59       | 20.29       | 0           | CIL21      |
| CIL22      | 82.16       | 16.09      | 18.15      | 56.17       | 0           | CIL22      |
| CIL23      | 81.81       | 5.53       | 8.31       | 20.06       | 0           | CIL23      |
| CIL24      | 120.6       | 5.73       | 9.32       | 22.62       | 0           | CIL24      |
| CIL25      | 57.92       | 20.4       | 17.59      | 73.09       | 0           | CIL25      |
| CIL26      | 30.46       | 11.4       | 11.28      | 100.71      | 0           | CIL26      |
| CIL27      | 27.83       | 25.41      | 14.35      | 93.83       | 0           | CIL27      |
| CIL28      | 31.95       | 26.25      | 14.38      | 115.66      | 0           | CIL28      |
| CIL29      | 100.09      | 1.77       | 6.66       | 9.9         | 0           | CIL29      |
| CIL30      | 32.72       | 34.19      | 16.61      | 144.85      | 0           | CIL30      |
| CIL31      | 58.97       | 11.01      | 11.78      | 40.2        | 0           | CIL31      |

|       |        |       |       |        |   |       |
|-------|--------|-------|-------|--------|---|-------|
| CIL32 | 58.3   | 23.15 | 19.2  | 81.64  | 0 | CIL32 |
| CIL33 | 30.19  | 25.85 | 15.61 | 108.06 | 0 | CIL33 |
| CIL34 | 62.49  | 25.59 | 21.75 | 87.13  | 0 | CIL34 |
| CIL35 | 36.02  | 21.82 | 14.5  | 76.81  | 0 | CIL35 |
| CIL36 | 42.13  | 16.32 | 12.76 | 69.87  | 0 | CIL36 |
| CIL37 | 44.93  | 15.73 | 13.38 | 60.23  | 0 | CIL37 |
| CIL38 | 57.25  | 23.03 | 18.66 | 86.25  | 0 | CIL38 |
| CIL39 | 71.47  | 13.49 | 15.29 | 48.92  | 0 | CIL39 |
| CIL40 | 39.87  | 22.76 | 15.58 | 103.89 | 0 | CIL40 |
| CIL41 | 60.08  | 8.03  | 9.3   | 44.94  | 0 | CIL41 |
| CIL42 | 48.71  | 23.89 | 18.29 | 113.45 | 0 | CIL42 |
| CIL43 | 62.13  | 13.36 | 14.18 | 76.71  | 0 | CIL43 |
| CIL44 | 158.12 | 8.55  | 15.15 | 29.96  | 0 | CIL44 |
| CIL45 | 72.35  | 25.17 | 22.31 | 96.02  | 0 | CIL45 |
| CIL46 | 36.2   | 37.9  | 19.83 | 187.42 | 0 | CIL46 |
| CIL47 | 70.42  | 1.3   | 1.83  | 18.86  | 0 | CIL47 |
| CIL48 | 104.83 | 5.88  | 8.81  | 19.72  | 0 | CIL48 |
| CIL49 | 65.38  | 26.32 | 22.43 | 112.21 | 0 | CIL49 |
| CIL50 | 232.33 | 0.83  | 2.67  | 3.12   | 0 | CIL50 |
| CIL51 | 88.27  | 5.49  | 7.42  | 22.82  | 0 | CIL51 |
| CIL52 | 72.42  | 12.61 | 15.44 | 51.86  | 0 | CIL52 |
| CIL53 | 42.56  | 34.47 | 22.58 | 172.69 | 0 | CIL53 |
| CIL54 | 52.56  | 33.62 | 23.27 | 155.84 | 0 | CIL54 |
| CIL55 | 124.51 | 7.5   | 13.41 | 28.45  | 0 | CIL55 |
| CIL56 | 64.15  | 11.48 | 12.26 | 51.25  | 0 | CIL56 |
| CIL57 | 123.32 | 5.42  | 8.3   | 21.56  | 0 | CIL57 |
| CIL58 | 58.09  | 1.52  | 2.63  | 28.2   | 0 | CIL58 |
| CIL59 | 220.54 | 0.85  | 2.22  | 2.14   | 0 | CIL59 |
| CIL60 | 51.11  | 37.65 | 25.46 | 199.17 | 0 | CIL60 |
| CIL61 | 114.25 | 11.32 | 20.09 | 39.52  | 0 | CIL61 |
| CIL62 | 117.85 | 7.78  | 15.91 | 18.52  | 0 | CIL62 |
| CIL63 | 111.63 | 6.77  | 12.64 | 16.79  | 0 | CIL63 |
| CIL64 | 101.96 | 4.2   | 8     | 7.58   | 0 | CIL64 |
| CIL65 | 67.98  | 8.68  | 11.87 | 16.37  | 0 | CIL65 |
| CIL66 | 56.04  | 27.8  | 23.04 | 61.73  | 0 | CIL66 |
| CIL67 | 62.78  | 0.45  | 0.8   | 3.71   | 0 | CIL67 |
| CIL68 | 39.95  | 26.11 | 17.44 | 61.44  | 0 | CIL68 |
| CIL69 | 181.83 | 16.74 | 32.72 | 27.58  | 0 | CIL69 |
| CIL70 | 29.18  | 26.99 | 14.92 | 56.18  | 0 | CIL70 |
| CIL71 | 74.89  | 7.82  | 12.55 | 17.11  | 0 | CIL71 |
| CIL72 | 230.59 | 8.85  | 21.53 | 16.41  | 0 | CIL72 |
| CIL73 | 72.42  | 9.62  | 13.22 | 26.69  | 0 | CIL73 |
| CIL74 | 51.46  | 22.95 | 19.77 | 57.29  | 0 | CIL74 |
| CIL75 | 54.84  | 13.2  | 14.54 | 36.2   | 0 | CIL75 |
| CIL76 | 108.4  | 5.88  | 22.02 | 16.73  | 0 | CIL76 |
| CIL77 | 73.99  | 21.61 | 23.83 | 43.8   | 0 | CIL77 |
| CIL78 | 65.62  | 12    | 14.42 | 39.17  | 0 | CIL78 |
| CIL79 | 37.28  | 25.47 | 17.91 | 70.63  | 0 | CIL79 |
| CIL80 | 106.44 | 11.62 | 17.93 | 47.02  | 0 | CIL80 |
| CIL81 | 490.95 | 3.31  | 10.67 | 5.34   | 0 | CIL81 |
| CIL82 | 48.81  | 13.24 | 12.88 | 36.95  | 0 | CIL82 |

|       |        |       |       |       |   |       |
|-------|--------|-------|-------|-------|---|-------|
| CIL83 | 67.97  | 17    | 19.33 | 43.17 | 0 | CIL83 |
| CIL84 | 57.28  | 14.78 | 15.73 | 43.64 | 0 | CIL84 |
| CIL85 | 81.5   | 18.31 | 21.92 | 49.3  | 0 | CIL85 |
| CIL86 | 59.53  | 12.82 | 13.91 | 33.91 | 0 | CIL86 |
| CIL87 | 157.15 | 20.91 | 33.79 | 42.97 | 0 | CIL87 |
| CIL88 | 70.03  | 20.29 | 20.51 | 49.91 | 0 | CIL88 |
| CIL89 | 198.9  | 3.5   | 9.9   | 7.95  | 0 | CIL89 |
| CIL90 | 67.76  | 15.16 | 16.86 | 38.73 | 0 | CIL90 |

GLITTER!: Age estimates: 1 sigma uncertainty (ma).

GLITTER!: N

| Analysis_# | Pb207/Pb206 | Pb206/U233 | Pb207/U233 | Pb208/Th232 | Pb208/Pb206 | Analysis_# |
|------------|-------------|------------|------------|-------------|-------------|------------|
| BAY1       | 0           | 3.81       | 10.26      | 7.36        | 0           | BAY1       |
| BAY2       | 135.18      | 4.47       | 21.84      | 12.63       | 0           | BAY2       |
| BAY3       | 77.25       | 18.1       | 20.91      | 42.32       | 0           | BAY3       |
| BAY4       | 150.88      | 4.36       | 15.77      | 13.04       | 0           | BAY4       |
| BAY5       | 50.79       | 26.06      | 24.44      | 46.7        | 0           | BAY5       |
| BAY6       | 65.49       | 9.16       | 20.38      | 19.03       | 0           | BAY6       |
| BAY7       | 161.14      | 3.6        | 9.4        | 5.99        | 0           | BAY7       |
| BAY8       | 126         | 6.2        | 19.45      | 26.27       | 0           | BAY8       |
| BAY9       | 0           | 3.05       | 6.51       | 5.71        | 0           | BAY9       |
| BAY10      | 71.43       | 17.22      | 18.66      | 49.78       | 0           | BAY10      |
| BAY11      | 0           | 4.16       | 6.38       | 9.96        | 0           | BAY11      |
| BAY12      | 235.77      | 2.98       | 7.9        | 5.52        | 0           | BAY12      |
| BAY13      | 75.29       | 4.05       | 6.17       | 11.81       | 0           | BAY13      |
| BAY14      | 76.02       | 4.21       | 6.3        | 10.55       | 0           | BAY14      |
| BAY15      | 54.78       | 3.41       | 4.37       | 8.62        | 0           | BAY15      |
| BAY16      | 75.86       | 3.69       | 5.74       | 11.92       | 0           | BAY16      |
| BAY17      | 119         | 3.02       | 5.7        | 7.25        | 0           | BAY17      |
| BAY18      | 170.72      | 2.87       | 6.16       | 6.53        | 0           | BAY18      |
| BAY19      | 33.8        | 14.68      | 10.41      | 36.12       | 0           | BAY19      |
| BAY20      | 89.67       | 2.91       | 7.12       | 8.67        | 0           | BAY20      |
| BAY21      | 115.12      | 2.36       | 4.52       | 7.73        | 0           | BAY21      |
| BAY22      | 87.75       | 4.69       | 7.58       | 13.44       | 0           | BAY22      |
| BAY23      | 63.24       | 8.92       | 11.41      | 19.62       | 0           | BAY23      |
| BAY24      | 74.07       | 3.56       | 5.39       | 10.08       | 0           | BAY24      |
| BAY25      | 400.13      | 2.09       | 6.37       | 7.85        | 0           | BAY25      |
| BAY26      | 300.96      | 4.88       | 12.17      | 13.66       | 0           | BAY26      |
| BAY27      | 36.95       | 3.44       | 3.48       | 9.11        | 0           | BAY27      |
| BAY28      | 162.78      | 3.05       | 6.37       | 7.83        | 0           | BAY28      |
| BAY29      | 152.93      | 2.64       | 5.76       | 6.16        | 0           | BAY29      |
| BAY30      | 60.51       | 8.42       | 10.16      | 32.3        | 0           | BAY30      |
| BAY31      | 82.71       | 3.74       | 6.09       | 13.21       | 0           | BAY31      |
| BAY32      | 52.69       | 4.3        | 5.29       | 12.91       | 0           | BAY32      |
| BAY33      | 59.92       | 3.32       | 4.65       | 10.12       | 0           | BAY33      |
| BAY34      | 213.69      | 5.75       | 12.63      | 18.22       | 0           | BAY34      |
| BAY35      | 92.55       | 10.57      | 14.76      | 19.73       | 0           | BAY35      |
| BAY36      | 77.75       | 2.17       | 3.82       | 6.27        | 0           | BAY36      |

|       |        |         |         |         |   |       |
|-------|--------|---------|---------|---------|---|-------|
| BAY37 | 554.49 | 2.51    | 8.24    | 7.4     | 0 | BAY37 |
| BAY38 | 227.57 | 4.84    | 11.11   | 13.86   | 0 | BAY38 |
| BAY39 | 28.74  | 13.5    | 9.31    | 45.71   | 0 | BAY39 |
| BAY40 | 51.59  | 9.42    | 10.06   | 29.6    | 0 | BAY40 |
| BAY41 | 96.37  | 11.77   | 16.2    | 31.36   | 0 | BAY41 |
| BAY42 | 85.33  | 4.77    | 7.78    | 16.1    | 0 | BAY42 |
| BAY43 | 38.65  | 8.42    | 7.7     | 22.65   | 0 | BAY43 |
| BAY44 | 212.67 | 3.83    | 8.84    | 13.05   | 0 | BAY44 |
| BAY45 | 121.32 | 8.09    | 13.64   | 23.37   | 0 | BAY45 |
| BAY46 | 278.11 | 5.62    | 14.07   | 19.9    | 0 | BAY46 |
| BAY47 | 151.95 | 1.82    | 3.72    | 5.27    | 0 | BAY47 |
| BAY48 | 191.61 | 3.44    | 7.27    | 9.62    | 0 | BAY48 |
| BAY49 | 0      | 2685.87 | -812.76 | 3177.88 | 0 | BAY49 |
| BAY50 | 108.78 | 2.52    | 4.46    | 6.87    | 0 | BAY50 |
| BAY51 | 107.23 | 4.7     | 7.93    | 16.54   | 0 | BAY51 |
| BAY52 | 209.8  | 3.31    | 7.24    | 11.64   | 0 | BAY52 |
| BAY53 | 360.45 | 2       | 5.51    | 7.36    | 0 | BAY53 |
| BAY54 | 132.24 | 2       | 3.82    | 5.85    | 0 | BAY54 |
| BAY55 | 189.15 | 4.24    | 9.77    | 11.16   | 0 | BAY55 |
| BAY56 | 133.38 | 4.07    | 7.41    | 12.6    | 0 | BAY56 |
| BAY57 | 290.25 | 1.63    | 4.41    | 7.51    | 0 | BAY57 |
| BAY58 | 40.81  | 13.21   | 11.12   | 45.71   | 0 | BAY58 |
| BAY59 | 118.14 | 2.58    | 4.95    | 6.25    | 0 | BAY59 |
| BAY60 | 44.11  | 8.83    | 8.52    | 28.61   | 0 | BAY60 |
| BAY61 | 99.36  | 9.14    | 16.2    | 32.85   | 0 | BAY61 |
| BAY62 | 101.71 | 2.12    | 3.78    | 8.07    | 0 | BAY62 |
| BAY63 | 165.52 | 2.52    | 5.16    | 6.44    | 0 | BAY63 |
| BAY64 | 85.28  | 26.52   | 26.95   | 69.16   | 0 | BAY64 |
| BAY65 | 192.44 | 2.8     | 5.96    | 9.28    | 0 | BAY65 |
| BAY66 | 107.59 | 5.87    | 9.79    | 19.52   | 0 | BAY66 |
| BAY67 | 36.64  | 24.79   | 15.49   | 89.7    | 0 | BAY67 |

GLITTER!: Age estimates: 1 sigma uncertainty (ma).

| Th232/U23 | U238/Si29 | Pb207/Pb2 | Pb206/U23 | Pb207/U23 | Pb208/Th2 | Pb208/Pb2 |
|-----------|-----------|-----------|-----------|-----------|-----------|-----------|
| 0         | 0         | 19.53     | 12.53     | 15.24     | 13.73     | 0         |
| 0         | 0         | 21.66     | 8.52      | 7.93      | 8.55      | 0         |
| 0         | 0         | 56.31     | 186.34    | 315.51    | 795.71    | 0         |
| 0         | 0         | 34.86     | 4.18      | 7.68      | 4.23      | 0         |
| 0         | 0         | 22.21     | 8.54      | 8.62      | 8.55      | 0         |
| 0         | 0         | 65.42     | 1.44      | 7.4       | 3.06      | 0         |
| 0         | 0         | 22.15     | 9.54      | 14.41     | 12.02     | 0         |
| 0         | 0         | 73.74     | 1.28      | 4.23      | 1.94      | 0         |
| 0         | 0         | 23.29     | 11.86     | 15.56     | 14.73     | 0         |
| 0         | 0         | 37.71     | 1.21      | 2.44      | 1.42      | 0         |
| 0         | 0         | 52.29     | 0.94      | 2.58      | 1.12      | 0         |
| 0         | 0         | 78.14     | 1.32      | 4.71      | 2.09      | 0         |
| 0         | 0         | 23.12     | 7.31      | 7.44      | 7.87      | 0         |

|   |   |        |       |       |        |   |
|---|---|--------|-------|-------|--------|---|
| 0 | 0 | 29.6   | 4.43  | 6.63  | 4.39   | 0 |
| 0 | 0 | 23.45  | 6.46  | 6.88  | 9.11   | 0 |
| 0 | 0 | 68.42  | 1.23  | 4.74  | 2.08   | 0 |
| 0 | 0 | 19.78  | 10.1  | 9.57  | 8.44   | 0 |
| 0 | 0 | 40.95  | 2.76  | 5.88  | 3.63   | 0 |
| 0 | 0 | 26.17  | 4.05  | 4.92  | 4.24   | 0 |
| 0 | 0 | 53.24  | 0.8   | 2.3   | 0.94   | 0 |
| 0 | 0 | 37.76  | 1.35  | 2.65  | 1.72   | 0 |
| 0 | 0 | 26.44  | 5.94  | 7.68  | 6.36   | 0 |
| 0 | 0 | 26.83  | 6.73  | 9.13  | 7.3    | 0 |
| 0 | 0 | 31.69  | 1.82  | 2.96  | 2      | 0 |
| 0 | 0 | 24.22  | 8.54  | 9.92  | 11.59  | 0 |
| 0 | 0 | 37.41  | 1.86  | 3.59  | 2.75   | 0 |
| 0 | 0 | 18.28  | 14.68 | 8.81  | 16.84  | 0 |
| 0 | 0 | 92.58  | 2.22  | 13.92 | 3.07   | 0 |
| 0 | 0 | 47.54  | 0.82  | 1.83  | 1.33   | 0 |
| 0 | 0 | 51.96  | 0.88  | 2.17  | 1.17   | 0 |
| 0 | 0 | 44.76  | 0.96  | 2.43  | 1.33   | 0 |
| 0 | 0 | 37.73  | 2.72  | 5.99  | 3.57   | 0 |
| 0 | 0 | 20.77  | 13.65 | 12.7  | 15.83  | 0 |
| 0 | 0 | 24.64  | 7.4   | 9.93  | 8.76   | 0 |
| 0 | 0 | 33.21  | 1.78  | 2.9   | 2.11   | 0 |
| 0 | 0 | 20.24  | 12.81 | 9.94  | 13.75  | 0 |
| 0 | 0 | 17.36  | 31.51 | 49.34 | 67.73  | 0 |
| 0 | 0 | 67.94  | 1.1   | 3.3   | 1.69   | 0 |
| 0 | 0 | 27.88  | 5.35  | 7.06  | 7.18   | 0 |
| 0 | 0 | 38.31  | 4.52  | 8.71  | 5.69   | 0 |
| 0 | 0 | 70.39  | 1.07  | 3.07  | 1.68   | 0 |
| 0 | 0 | 62.11  | 0.79  | 2.32  | 1.28   | 0 |
| 0 | 0 | 33.13  | 8.14  | 14.48 | 9.99   | 0 |
| 0 | 0 | 22.13  | 8.4   | 7.53  | 9.95   | 0 |
| 0 | 0 | 101.04 | 1.38  | 5.1   | 2.61   | 0 |
| 0 | 0 | 18.98  | 17.06 | 11.83 | 21.36  | 0 |
| 0 | 0 | 45.9   | 11.1  | 27.43 | 15.2   | 0 |
| 0 | 0 | 36.69  | 4.76  | 9.67  | 5.95   | 0 |
| 0 | 0 | 63.06  | 1.32  | 3.88  | 2.18   | 0 |
| 0 | 0 | 36.51  | 2.96  | 5.28  | 4.73   | 0 |
| 0 | 0 | 20.73  | 8.44  | 10.61 | 11.59  | 0 |
| 0 | 0 | 41.84  | 4.83  | 10.54 | 6.26   | 0 |
| 0 | 0 | 92.7   | 1.41  | 5.53  | 2.48   | 0 |
| 0 | 0 | 35.06  | 5.21  | 9.19  | 6.27   | 0 |
| 0 | 0 | 24.19  | 8.92  | 9.5   | 11.21  | 0 |
| 0 | 0 | 20.74  | 43.59 | 83.02 | 226.32 | 0 |
| 0 | 0 | 21.65  | 13.35 | 11.91 | 18.73  | 0 |
| 0 | 0 | 32.9   | 1.96  | 3.08  | 2.88   | 0 |
| 0 | 0 | 77.42  | 1.53  | 5.26  | 3.14   | 0 |
| 0 | 0 | 29.57  | 7.65  | 11.2  | 11.11  | 0 |
| 0 | 0 | 39.51  | 2.71  | 5.28  | 3.75   | 0 |
| 0 | 0 | 69.66  | 1.54  | 4.81  | 3.32   | 0 |
| 0 | 0 | 71.66  | 1.22  | 4.53  | 2.17   | 0 |
| 0 | 0 | 64.48  | 0.89  | 2.57  | 1.2    | 0 |

|   |   |       |       |       |       |   |
|---|---|-------|-------|-------|-------|---|
| 0 | 0 | 27.56 | 2.04  | 3.25  | 2.85  | 0 |
| 0 | 0 | 34.36 | 1.98  | 3.42  | 2.4   | 0 |
| 0 | 0 | 37.74 | 2.19  | 5.6   | 3.83  | 0 |
| 0 | 0 | 46.78 | 3.45  | 8.06  | 4.69  | 0 |
| 0 | 0 | 56.96 | 1.01  | 3.11  | 2.08  | 0 |
| 0 | 0 | 46.31 | 1.24  | 2.78  | 1.54  | 0 |
| 0 | 0 | 21.42 | 13.9  | 11.26 | 19.34 | 0 |
| 0 | 0 | 36.84 | 2.26  | 4     | 3.15  | 0 |
| 0 | 0 | 21.84 | 15.26 | 13.54 | 20.72 | 0 |
| 0 | 0 | 34.69 | 2.28  | 3.96  | 3.36  | 0 |
| 0 | 0 | 93.03 | 1.52  | 5.21  | 2.77  | 0 |
| 0 | 0 | 35.99 | 2.63  | 4.57  | 4.02  | 0 |
| 0 | 0 | 24.97 | 1.22  | 7.82  | 2.39  | 0 |
| 0 | 0 | 22.71 | 14.47 | 13.95 | 20.37 | 0 |
| 0 | 0 | 22.48 | 13.55 | 12.23 | 19.33 | 0 |
| 0 | 0 | 71.18 | 1.23  | 4.12  | 1.84  | 0 |
| 0 | 0 | 29.21 | 6.77  | 10.12 | 8.7   | 0 |
| 0 | 0 | 62.59 | 9.59  | 28.14 | 16.13 | 0 |
| 0 | 0 | 28.47 | 5.89  | 7.73  | 8.95  | 0 |
| 0 | 0 | 62.47 | 1.28  | 4.6   | 2.19  | 0 |
| 0 | 0 | 29.44 | 7.52  | 10.91 | 10.02 | 0 |
| 0 | 0 | 25.12 | 1.24  | 3.49  | 1.76  | 0 |
| 0 | 0 | 28.58 | 9.91  | 13.78 | 14.03 | 0 |

GLITTER!: Age estimates: 1 sigma uncertainty (ma).

| Th232/U23 | U238/Si29 | Pb207/Pb2 | Pb206/U23 | Pb207/U23 | Pb208/Th2 | Pb208/Pb2 |
|-----------|-----------|-----------|-----------|-----------|-----------|-----------|
| 0         | 0         | 17.55     | 10.34     | 9.63      | 5.82      | 0         |
| 0         | 0         | 27.24     | 5.55      | 6.51      | 4.6       | 0         |
| 0         | 0         | 35.97     | 1.2       | 2         | 1.23      | 0         |
| 0         | 0         | 25.56     | 10.29     | 12.15     | 9.62      | 0         |
| 0         | 0         | 34.68     | 5.45      | 8.61      | 5.01      | 0         |
| 0         | 0         | 20.37     | 14.58     | 12.27     | 12.51     | 0         |
| 0         | 0         | 30.3      | 0.36      | 1.31      | 0.72      | 0         |
| 0         | 0         | 69.99     | 1.76      | 4.82      | 2.72      | 0         |
| 0         | 0         | 51.44     | 1.12      | 2.34      | 1.19      | 0         |
| 0         | 0         | 28.91     | 2.36      | 2.96      | 4.13      | 0         |
| 0         | 0         | 39.34     | 2.29      | 3.91      | 2.3       | 0         |
| 0         | 0         | 28.65     | 9.93      | 13.37     | 9.05      | 0         |
| 0         | 0         | 65.9      | 1.37      | 3.57      | 1.64      | 0         |
| 0         | 0         | 22.96     | 4.61      | 5.35      | 4         | 0         |
| 0         | 0         | 18.4      | 13.15     | 29.24     | 15.89     | 0         |
| 0         | 0         | 76.27     | 1.76      | 5.2       | 3.24      | 0         |
| 0         | 0         | 23.6      | 7.26      | 7.01      | 7.27      | 0         |
| 0         | 0         | 28.77     | 8.57      | 11.22     | 9.11      | 0         |
| 0         | 0         | 62.16     | 2.59      | 6.29      | 3.32      | 0         |
| 0         | 0         | 92.67     | 1.43      | 5.46      | 2.69      | 0         |



|   |   |        |       |       |       |   |
|---|---|--------|-------|-------|-------|---|
| 0 | 0 | 32.15  | 1.1   | 4.63  | 2.63  | 0 |
| 0 | 0 | 39.12  | 2.64  | 4.45  | 5.95  | 0 |
| 0 | 0 | 44.92  | 1.55  | 3.02  | 1.44  | 0 |
| 0 | 0 | 28.53  | 3.34  | 4.01  | 3.24  | 0 |
| 0 | 0 | 25.9   | 11.49 | 13.72 | 10.42 | 0 |
| 0 | 0 | 55.27  | 2.33  | 5.49  | 2.83  | 0 |
| 0 | 0 | 39.62  | 2.12  | 3.5   | 3.57  | 0 |
| 0 | 0 | 48.36  | 2.37  | 9.36  | 5.71  | 0 |
| 0 | 0 | 45.71  | 1.23  | 3.45  | 1.14  | 0 |
| 0 | 0 | 26.75  | 5.11  | 5.63  | 4.33  | 0 |
| 0 | 0 | 32.64  | 2.03  | 2.83  | 2.04  | 0 |
| 0 | 0 | 33.88  | 2.65  | 3.82  | 2.64  | 0 |
| 0 | 0 | 33.07  | 4.89  | 6.71  | 4.13  | 0 |
| 0 | 0 | 25.45  | 9.33  | 10.13 | 8.58  | 0 |
| 0 | 0 | 16.39  | 36.8  | 45.95 | 58.16 | 0 |
| 0 | 0 | 49.82  | 0.34  | 0.71  | 0.47  | 0 |
| 0 | 0 | 24.49  | 6.04  | 6.1   | 7.81  | 0 |
| 0 | 0 | 22.66  | 7.94  | 7.9   | 6.96  | 0 |
| 0 | 0 | 30.27  | 2.11  | 2.71  | 1.82  | 0 |
| 0 | 0 | 81.98  | 2.29  | 7.05  | 4.13  | 0 |
| 0 | 0 | 61.93  | 0.98  | 2.74  | 1.32  | 0 |
| 0 | 0 | 44     | 0.94  | 1.73  | 0.98  | 0 |
| 0 | 0 | 21.43  | 9.41  | 8.18  | 8.59  | 0 |
| 0 | 0 | 56.12  | 1.27  | 3.11  | 1.62  | 0 |
| 0 | 0 | 178.75 | 0.71  | 3.54  | 1.23  | 0 |
| 0 | 0 | 59.69  | 2.65  | 6.17  | 3.63  | 0 |
| 0 | 0 | 19.98  | 15.33 | 11.15 | 14.26 | 0 |
| 0 | 0 | 66.17  | 0.95  | 2.59  | 1.02  | 0 |
| 0 | 0 | 24.66  | 8.31  | 12.64 | 14.78 | 0 |
| 0 | 0 | 26.62  | 5.94  | 6.59  | 5.07  | 0 |
| 0 | 0 | 25.49  | 5.46  | 5.59  | 4.91  | 0 |
| 0 | 0 | 30.92  | 11.22 | 20.12 | 10.07 | 0 |
| 0 | 0 | 29.19  | 7.32  | 8.73  | 8.32  | 0 |
| 0 | 0 | 20.47  | 14.04 | 11.16 | 12.46 | 0 |
| 0 | 0 | 29.09  | 2.18  | 3.5   | 2.39  | 0 |
| 0 | 0 | 111.34 | 1.6   | 5.32  | 2.51  | 0 |
| 0 | 0 | 28.09  | 8.91  | 10.3  | 9.07  | 0 |
| 0 | 0 | 38.08  | 1.13  | 1.73  | 1.11  | 0 |
| 0 | 0 | 33.57  | 2.41  | 4.06  | 2.88  | 0 |
| 0 | 0 | 37.08  | 3.72  | 5.79  | 3.5   | 0 |
| 0 | 0 | 35.96  | 2.26  | 3.56  | 2.38  | 0 |
| 0 | 0 | 28.36  | 8.11  | 10.62 | 9.04  | 0 |
| 0 | 0 | 35.6   | 5.82  | 8.82  | 5.01  | 0 |
| 0 | 0 | 34.08  | 4.38  | 6.15  | 4.39  | 0 |
| 0 | 0 | 155.78 | 1.88  | 8.58  | 3.74  | 0 |
| 0 | 0 | 42.65  | 9.37  | 17.02 | 12.1  | 0 |
| 0 | 0 | 17.23  | 36.99 | 48.67 | 94.19 | 0 |
| 0 | 0 | 48.55  | 9.83  | 21.41 | 11.2  | 0 |
| 0 | 0 | 176.14 | 2.05  | 8.74  | 4.42  | 0 |
| 0 | 0 | 30.65  | 2.92  | 6.8   | 2.97  | 0 |
| 0 | 0 | 22.68  | 9.4   | 7.87  | 9.04  | 0 |

|   |   |        |       |       |       |   |
|---|---|--------|-------|-------|-------|---|
| 0 | 0 | 55.13  | 6.48  | 14.44 | 6.39  | 0 |
| 0 | 0 | 24.57  | 10.62 | 10.4  | 9.92  | 0 |
| 0 | 0 | 64.65  | 1.48  | 4.63  | 1.79  | 0 |
| 0 | 0 | 19.13  | 20.18 | 13.6  | 21.46 | 0 |
| 0 | 0 | 50.59  | 0.38  | 0.75  | 0.42  | 0 |
| 0 | 0 | 25.63  | 11.26 | 12.53 | 15.84 | 0 |
| 0 | 0 | 19.83  | 21.33 | 17.57 | 23.07 | 0 |
| 0 | 0 | 22.93  | 9.67  | 8.38  | 10.04 | 0 |
| 0 | 0 | 116.89 | 1.76  | 5.99  | 3.09  | 0 |
| 0 | 0 | 29.36  | 6.24  | 7.59  | 7.64  | 0 |
| 0 | 0 | 50.24  | 3.11  | 6.22  | 3.54  | 0 |
| 0 | 0 | 28.74  | 8.95  | 10.96 | 10.1  | 0 |
| 0 | 0 | 36.68  | 5.64  | 8.33  | 6.62  | 0 |
| 0 | 0 | 34.81  | 11.69 | 17.14 | 12.64 | 0 |

GLITTER!: Age estimates: 1 sigma uncertainty (ma).

| Th232/U23 | U238/Si29 | Pb207/Pb2 | Pb206/U23 | Pb207/U23 | Pb208/Th2 | Pb208/Pb2 |
|-----------|-----------|-----------|-----------|-----------|-----------|-----------|
| 0         | 0         | 50.16     | 2.17      | 4.28      | 2.37      | 0         |
| 0         | 0         | 22.03     | 1.69      | 1.82      | 1.17      | 0         |
| 0         | 0         | 21.9      | 2.1       | 2.36      | 2.06      | 0         |
| 0         | 0         | 7.89      | 25.16     | 14.31     | 13.33     | 0         |
| 0         | 0         | 38.99     | 3.93      | 5.96      | 3.77      | 0         |
| 0         | 0         | 28        | 1.69      | 2.34      | 1.66      | 0         |
| 0         | 0         | 43.03     | 4.11      | 5.97      | 3.15      | 0         |
| 0         | 0         | 27.4      | 3.07      | 2.89      | 2.2       | 0         |
| 0         | 0         | 13.14     | 14.04     | 10.11     | 6.33      | 0         |
| 0         | 0         | 13.82     | 13.81     | 11.2      | 6.99      | 0         |
| 0         | 0         | 31.26     | 0.56      | 0.77      | 0.29      | 0         |
| 0         | 0         | 24.63     | 2.13      | 2.57      | 1.88      | 0         |
| 0         | 0         | 43.3      | 7.45      | 14.67     | 6.06      | 0         |
| 0         | 0         | 17.61     | 14.74     | 15.46     | 9.3       | 0         |
| 0         | 0         | 15.45     | 4.91      | 4.66      | 7.01      | 0         |
| 0         | 0         | 64.28     | 1.6       | 2.82      | 1.45      | 0         |
| 0         | 0         | 15.56     | 13.53     | 11.6      | 8.63      | 0         |
| 0         | 0         | 14.44     | 11.41     | 9.75      | 7.56      | 0         |
| 0         | 0         | 19.81     | 6.03      | 5.26      | 3.27      | 0         |
| 0         | 0         | 17.24     | 14.87     | 14.92     | 9.25      | 0         |
| 0         | 0         | 16.35     | 2.14      | 1.68      | 1.96      | 0         |
| 0         | 0         | 12.41     | 19.56     | 14.83     | 14.08     | 0         |
| 0         | 0         | 33.97     | 1.06      | 1.58      | 1.62      | 0         |
| 0         | 0         | 16.21     | 9.58      | 6.77      | 5.47      | 0         |
| 0         | 0         | 23.52     | 5.88      | 5.44      | 3.81      | 0         |
| 0         | 0         | 31.63     | 3.53      | 4.48      | 3.61      | 0         |
| 0         | 0         | 10.66     | 17.33     | 9.8       | 12.54     | 0         |
| 0         | 0         | 11.77     | 19.71     | 12.26     | 13.84     | 0         |
| 0         | 0         | 22.53     | 2.37      | 3.06      | 2.81      | 0         |
| 0         | 0         | 10.4      | 27.05     | 19.4      | 21.52     | 0         |

|   |   |       |       |       |       |   |
|---|---|-------|-------|-------|-------|---|
| 0 | 0 | 36.71 | 1.1   | 2.46  | 0.78  | 0 |
| 0 | 0 | 24.86 | 2.43  | 3.25  | 3.04  | 0 |
| 0 | 0 | 22.21 | 8.49  | 7.5   | 5.93  | 0 |
| 0 | 0 | 16.52 | 14.8  | 11.44 | 10.67 | 0 |
| 0 | 0 | 22.4  | 8.47  | 7.61  | 5.93  | 0 |
| 0 | 0 | 11.35 | 22.32 | 7.94  | 15.95 | 0 |
| 0 | 0 | 51.91 | 2.51  | 4.27  | 2.55  | 0 |
| 0 | 0 | 45.82 | 1.77  | 3.48  | 2.01  | 0 |
| 0 | 0 | 22.58 | 17.12 | 21    | 14.97 | 0 |
| 0 | 0 | 33.34 | 3.64  | 3.75  | 3.32  | 0 |
| 0 | 0 | 14.6  | 20.55 | 15.72 | 17.5  | 0 |
| 0 | 0 | 19.49 | 9.95  | 7.87  | 15.58 | 0 |
| 0 | 0 | 22.08 | 3.04  | 3.48  | 3.6   | 0 |
| 0 | 0 | 16.49 | 16.71 | 13.25 | 15.78 | 0 |
| 0 | 0 | 13.95 | 22.52 | 15.49 | 20.76 | 0 |
| 0 | 0 | 51.79 | 2.57  | 4.88  | 3.95  | 0 |
| 0 | 0 | 18.53 | 2.48  | 2.37  | 2.33  | 0 |
| 0 | 0 | 29.49 | 1.21  | 1.59  | 1.78  | 0 |
| 0 | 0 | 29.11 | 4.42  | 6.19  | 6.58  | 0 |
| 0 | 0 | 68.18 | 0.87  | 1.69  | 1.21  | 0 |
| 0 | 0 | 22.38 | 3.07  | 3.38  | 3.85  | 0 |
| 0 | 0 | 17.28 | 2.49  | 3.53  | 2.68  | 0 |
| 0 | 0 | 33.59 | 9.57  | 13.23 | 9.86  | 0 |
| 0 | 0 | 23.87 | 3.95  | 5.65  | 6.21  | 0 |
| 0 | 0 | 60.59 | 2.39  | 4.33  | 2.8   | 0 |
| 0 | 0 | 21.6  | 17.35 | 17.59 | 17.4  | 0 |
| 0 | 0 | 17.09 | 11.34 | 10.43 | 15.63 | 0 |
| 0 | 0 | 56.7  | 2.12  | 3.7   | 2.82  | 0 |
| 0 | 0 | 16.08 | 10.54 | 8.26  | 9.31  | 0 |
| 0 | 0 | 20.59 | 10.91 | 8.78  | 10.58 | 0 |
| 0 | 0 | 23.29 | 3.58  | 4.39  | 5.2   | 0 |
| 0 | 0 | 17.99 | 11.76 | 10.9  | 16.46 | 0 |
| 0 | 0 | 27.86 | 7.27  | 9.64  | 5.88  | 0 |
| 0 | 0 | 16.89 | 23.04 | 15.84 | 24.92 | 0 |
| 0 | 0 | 16.56 | 24.44 | 17.23 | 26.9  | 0 |
| 0 | 0 | 15.17 | 19.6  | 13.59 | 25.84 | 0 |
| 0 | 0 | 25.88 | 2.84  | 3.45  | 4.12  | 0 |
| 0 | 0 | 45.41 | 1.43  | 2.4   | 1.71  | 0 |
| 0 | 0 | 15.97 | 26.46 | 16.27 | 31.48 | 0 |
| 0 | 0 | 25.5  | 11.2  | 11.4  | 12.23 | 0 |
| 0 | 0 | 75.81 | 2.8   | 5.76  | 3.88  | 0 |
| 0 | 0 | 22.78 | 12.72 | 11.25 | 14.48 | 0 |
| 0 | 0 | 25.43 | 3.58  | 4.75  | 5.97  | 0 |
| 0 | 0 | 25.67 | 2.57  | 3.17  | 3.95  | 0 |
| 0 | 0 | 24.59 | 17.96 | 18.16 | 21.38 | 0 |
| 0 | 0 | 46.92 | 1.72  | 2.86  | 3.12  | 0 |
| 0 | 0 | 24.15 | 14.21 | 12.46 | 16.63 | 0 |
| 0 | 0 | 20.51 | 9.13  | 9.41  | 15.49 | 0 |
| 0 | 0 | 28.03 | 7.6   | 7.41  | 8.51  | 0 |
| 0 | 0 | 21.37 | 3.24  | 10.33 | 9.28  | 0 |
| 0 | 0 | 41.3  | 2.2   | 3.7   | 3.37  | 0 |

|   |   |        |       |       |       |   |
|---|---|--------|-------|-------|-------|---|
| 0 | 0 | 37.73  | 7.5   | 10.16 | 10.82 | 0 |
| 0 | 0 | 18.34  | 26.72 | 19.87 | 46.12 | 0 |
| 0 | 0 | 29.61  | 3.5   | 5.02  | 6.2   | 0 |
| 0 | 0 | 66.61  | 2.92  | 6.01  | 4.12  | 0 |
| 0 | 0 | 30.93  | 3.28  | 4.79  | 5.91  | 0 |
| 0 | 0 | 31.38  | 2.85  | 4.25  | 5.05  | 0 |
| 0 | 0 | 63.51  | 2.87  | 5.47  | 4.6   | 0 |
| 0 | 0 | 23.66  | 21.15 | 17.83 | 28.9  | 0 |
| 0 | 0 | 26.82  | 7.05  | 8.86  | 13.83 | 0 |
| 0 | 0 | 40.84  | 5.09  | 8.65  | 7.53  | 0 |
| 0 | 0 | 19.26  | 24.86 | 23.17 | 67.76 | 0 |
| 0 | 0 | 32.86  | 2.29  | 3.55  | 4.28  | 0 |
| 0 | 0 | 22.03  | 24.91 | 18.27 | 35.36 | 0 |
| 0 | 0 | 33.43  | 10.75 | 12.99 | 13.87 | 0 |
| 0 | 0 | 58.34  | 2.73  | 4.37  | 3.82  | 0 |
| 0 | 0 | 35.23  | 3.3   | 5.42  | 6.16  | 0 |
| 0 | 0 | 29.88  | 10.27 | 10.6  | 13.66 | 0 |
| 0 | 0 | 51.12  | 1.18  | 2.21  | 1.33  | 0 |
| 0 | 0 | 33.32  | 2.98  | 4.67  | 5.65  | 0 |
| 0 | 0 | 36.15  | 7.29  | 8.74  | 9.32  | 0 |
| 0 | 0 | 36.57  | 2.46  | 4.17  | 4.54  | 0 |
| 0 | 0 | 91.23  | 1.69  | 5.44  | 3.05  | 0 |
| 0 | 0 | 34.02  | 11.46 | 14.03 | 16.57 | 0 |
| 0 | 0 | 29.81  | 19.13 | 19.28 | 28.43 | 0 |
| 0 | 0 | 39.86  | 3.21  | 5.79  | 9.18  | 0 |
| 0 | 0 | 60.43  | 2.09  | 3.76  | 2.78  | 0 |
| 0 | 0 | 39.12  | 3.05  | 5.29  | 6.27  | 0 |
| 0 | 0 | 29.64  | 11.78 | 15.26 | 25.37 | 0 |
| 0 | 0 | 28.24  | 14.88 | 17.73 | 32.06 | 0 |
| 0 | 0 | 22.97  | 36.45 | 25.43 | 64.65 | 0 |
| 0 | 0 | 29.5   | 11.9  | 15.58 | 25.76 | 0 |
| 0 | 0 | 38.34  | 3.12  | 5.83  | 6.77  | 0 |
| 0 | 0 | 56.05  | 2.69  | 3.89  | 3.7   | 0 |
| 0 | 0 | 130.43 | 1.89  | 3.9   | 2.07  | 0 |
| 0 | 0 | 38.43  | 10.97 | 12.83 | 15.87 | 0 |
| 0 | 0 | 38.08  | 3.09  | 5.2   | 4.5   | 0 |
| 0 | 0 | 46.74  | 1.55  | 2.97  | 3.17  | 0 |
| 0 | 0 | 36.6   | 13.89 | 21    | 28.37 | 0 |
| 0 | 0 | 26.46  | 29.86 | 24.85 | 62.35 | 0 |

GLITTER!: Mean Raw CPS background NOT subtracted.

| Th232/U23 U238/Si29 |   | Si29    | La139 | Hf177   | Pb206   | Pb207  |        |
|---------------------|---|---------|-------|---------|---------|--------|--------|
| 0                   | 0 | 1059005 |       | 77      | 1611513 | 47817  | 4099   |
| 0                   | 0 | 1043848 |       | 5       | 1801022 | 81182  | 5209   |
| 0                   | 0 | 1082038 |       | 356     | 1778863 | 339228 | 39339  |
| 0                   | 0 | 1055426 |       | 5       | 1868876 | 84075  | 4722   |
| 0                   | 0 | 1008914 |       | 28      | 1836141 | 74356  | 6770   |
| 0                   | 0 | 1025662 |       | 7       | 2154456 | 130389 | 9670   |
| 0                   | 0 | 660175  | 12837 | 5881    | 3587    |        | 2904   |
| 0                   | 0 | 875435  | 15149 | 3915    | 2566    |        | 1998   |
| 0                   | 0 | 1039422 |       | 12      | 1544587 | 8041   | 509    |
| 0                   | 0 | 996985  |       | 4       | 1586823 | 87709  | 6152   |
| 0                   | 0 | 1023483 |       | 7       | 1771928 | 5310   | 314    |
| 0                   | 0 | 1037427 |       | 58      | 1882890 | 37335  | 1884   |
| 0                   | 0 | 1050397 |       | 87      | 1493557 | 150697 | 9793   |
| 0                   | 0 | 1050353 |       | 49      | 1875311 | 269995 | 29182  |
| 0                   | 0 | 1060759 |       | 8       | 1742361 | 4878   | 275    |
| 0                   | 0 | 1114215 | 34119 | 1928937 | 10964   |        | 687    |
| 0                   | 0 | 1080923 |       | 10      | 2521165 | 147294 | 8899   |
| 0                   | 0 | 1031996 |       | 10      | 1716768 | 69492  | 5174   |
| 0                   | 0 | 1049958 |       | 10      | 1917791 | 147517 | 11770  |
| 0                   | 0 | 981474  |       | 1       | 1718888 | 5306   | 313    |
| 0                   | 0 | 1042771 |       | 124     | 1895556 | 11165  | 631    |
| 0                   | 0 | 805170  | 13868 | 1958    | 5740    |        | 4452   |
| 0                   | 0 | 1002575 | 50481 | 1321412 | 15024   |        | 975    |
| 0                   | 0 | 1013835 |       | 1752    | 1703385 | 28421  | 1509   |
| 0                   | 0 | 1039895 |       | 10042   | 1416799 | 5895   | 1334   |
| 0                   | 0 | 993453  |       | 5       | 1711615 | 165385 | 14911  |
| 0                   | 0 | 1111129 |       | 5       | 2271371 | 74310  | 4580   |
| 0                   | 0 | 1008511 |       | 164     | 1889658 | 40095  | 2503   |
| 0                   | 0 | 1091836 | 20035 | 1882195 | 27634   |        | 1619   |
| 0                   | 0 | 1027587 |       | 141     | 2053846 | 148209 | 11877  |
| 0                   | 0 | 981300  |       | 6       | 1956936 | 338145 | 38434  |
| 0                   | 0 | 1085589 |       | 9       | 1861980 | 51145  | 3027   |
| 0                   | 0 | 1132195 |       | 2       | 1353998 | 123513 | 9908   |
| 0                   | 0 | 1080706 |       | 15      | 2110945 | 44944  | 2742   |
| 0                   | 0 | 1086516 |       | 8       | 1770633 | 26818  | 1494   |
| 0                   | 0 | 1094328 |       | 45      | 2364904 | 893315 | 157107 |
| 0                   | 0 | 1114801 |       | 25      | 1835484 | 28071  | 1881   |
| 0                   | 0 | 1026473 | 2536  | 19279   | 10483   |        | 8467   |
| 0                   | 0 | 1015063 |       | 8       | 1924282 | 49548  | 3092   |

|   |   |          |      |         |        |       |
|---|---|----------|------|---------|--------|-------|
| 0 | 0 | 1050352  | 19   | 1649208 | 7449   | 465   |
| 0 | 0 | 1155351  | 6    | 2498243 | 299407 | 22839 |
| 0 | 0 | 957726   | 49   | 1669765 | 32028  | 2628  |
| 0 | 0 | 1010755  | 34   | 2020020 | 290599 | 21877 |
| 0 | 0 | 1046769  | 5    | 2037281 | 29885  | 1832  |
| 0 | 0 | 990320   | 3732 | 1867497 | 27914  | 1417  |
| 0 | 0 | 23512188 | 1    | 23      | 1102   | 28    |
| 0 | 0 | 4972243  | 21   | 862398  | 51125  | 3365  |
| 0 | 0 | 1132539  | 16   | 1307910 | 162922 | 26481 |
| 0 | 0 | 1142717  | 9    | 1454710 | 78352  | 5076  |
| 0 | 0 | 1140182  | 2    | 1411366 | 5815   | 381   |
| 0 | 0 | 1195586  | 13   | 1486983 | 28595  | 1940  |
| 0 | 0 | 1085210  | 3    | 1178587 | 16054  | 944   |
| 0 | 0 | 1088027  | 1    | 1096660 | 4516   | 474   |
| 0 | 0 | 1142702  | 5    | 1669606 | 92531  | 5745  |
| 0 | 0 | 1109646  | 4    | 1236605 | 5778   | 1287  |
| 0 | 0 | 1204982  | 5201 | 3512    | 7123   | 5468  |
| 0 | 0 | 1250904  | 23   | 1336003 | 52903  | 3452  |
| 0 | 0 | 1320128  | 6    | 1593060 | 10154  | 591   |
| 0 | 0 | 1218938  | 5    | 1652685 | 9027   | 544   |
| 0 | 0 | 1270880  | 120  | 1184752 | 5451   | 714   |
| 0 | 0 | 1223070  | 2955 | 1554515 | 23332  | 1472  |
| 0 | 0 | 1287476  | 2514 | 1685829 | 121910 | 7000  |
| 0 | 0 | 1151403  | 5    | 1484694 | 7380   | 462   |
| 0 | 0 | 1144756  | 10   | 1060373 | 21191  | 1774  |
| 0 | 0 | 1101954  | 2    | 1335303 | 37946  | 3064  |
| 0 | 0 | 1240487  | 3386 | 1654001 | 59588  | 3391  |
| 0 | 0 | 1263749  | 42   | 1532794 | 268200 | 34643 |
| 0 | 0 | 1292358  | 330  | 1591753 | 22060  | 1240  |
| 0 | 0 | 1284329  | 4    | 1690939 | 72303  | 5807  |
| 0 | 0 | 1323186  | 17   | 2470763 | 341683 | 21108 |
| 0 | 0 | 1218533  | 1242 | 1605589 | 29722  | 1785  |
| 0 | 0 | 1341139  | 446  | 2137745 | 113574 | 6920  |
| 0 | 0 | 1346228  | 6    | 2023971 | 690439 | 52158 |
| 0 | 0 | 1297806  | 91   | 1600917 | 25367  | 3055  |
| 0 | 0 | 938869   | 4043 | 7475    | 7942   | 6161  |
| 0 | 0 | 1227126  | 13   | 1943942 | 117916 | 6721  |
| 0 | 0 | 1184134  | 7    | 1450985 | 16648  | 1026  |
| 0 | 0 | 1164650  | 2    | 1520828 | 7264   | 454   |
| 0 | 0 | 1148217  | 8    | 1252770 | 8000   | 535   |

GLITTER!: Mean Raw CPS background NOT subtracted.

| Th232/U23 | U238/Si29 | Si29     | La139 | Hf177   | Pb206 | Pb207 |
|-----------|-----------|----------|-------|---------|-------|-------|
| 0         | 0         | 21954712 | 12617 | 87931   | 34925 | 91733 |
| 0         | 0         | 1995382  | 973   | 1450888 | 1794  | 336   |
| 0         | 0         | 1922942  | 1     | 1336698 | 3146  | 538   |

|   |   |         |      |         |         |        |
|---|---|---------|------|---------|---------|--------|
| 0 | 0 | 2126561 | 318  | 1525662 | 65078   | 22385  |
| 0 | 0 | 2043062 | 357  | 1738841 | 14216   | 2233   |
| 0 | 0 | 1963470 | 2    | 1298503 | 1306    | 222    |
| 0 | 0 | 2042172 | 3    | 1588755 | 2688    | 428    |
| 0 | 0 | 2146197 | 200  | 2241859 | 1020735 | 441022 |
| 0 | 0 | 2123247 | 17   | 1771830 | 40144   | 6983   |
| 0 | 0 | 2056221 | 15   | 2050212 | 13700   | 2186   |
| 0 | 0 | 2084185 | 2    | 2101386 | 43874   | 7891   |
| 0 | 0 | 1715336 | 5964 | 1423754 | 6905    | 1067   |
| 0 | 0 | 1943620 | 27   | 1649341 | 9593    | 1614   |
| 0 | 0 | 1807874 | 8    | 1403383 | 2624    | 424    |
| 0 | 0 | 1754111 | 373  | 1570980 | 1142    | 218    |
| 0 | 0 | 1803365 | 379  | 1619631 | 1479    | 341    |
| 0 | 0 | 1811646 | 505  | 1648674 | 3286    | 549    |
| 0 | 0 | 1794610 | 9    | 1408732 | 5866    | 971    |
| 0 | 0 | 1714109 | 88   | 1456902 | 3918    | 1128   |
| 0 | 0 | 1563324 | 2    | 1706623 | 24814   | 5054   |
| 0 | 0 | 1672712 | 2    | 1560614 | 3226    | 602    |
| 0 | 0 | 1645582 | 5    | 1354747 | 1076    | 243    |
| 0 | 0 | 1658567 | 19   | 1654535 | 1365    | 290    |
| 0 | 0 | 1690850 | 54   | 1506560 | 1217    | 261    |
| 0 | 0 | 1664339 | 5    | 1498652 | 3748    | 581    |
| 0 | 0 | 1758668 | 6710 | 1763095 | 1212    | 309    |
| 0 | 0 | 1756110 | 11   | 1847856 | 71043   | 20353  |
| 0 | 0 | 1648423 | 3    | 1573997 | 5057    | 752    |
| 0 | 0 | 1699384 | 61   | 1781800 | 15150   | 2406   |
| 0 | 0 | 1679022 | 4    | 1827623 | 51357   | 24588  |
| 0 | 0 | 1596102 | 11   | 1532586 | 2038    | 433    |
| 0 | 0 | 1639108 | 2    | 1687975 | 3405    | 577    |
| 0 | 0 | 1621720 | 3    | 2078818 | 21425   | 3881   |
| 0 | 0 | 1625573 | 12   | 1320333 | 693     | 178    |
| 0 | 0 | 1642983 | 9    | 1883357 | 9434    | 2148   |
| 0 | 0 | 1687681 | 78   | 1415378 | 39167   | 6151   |
| 0 | 0 | 1551626 | 53   | 1345786 | 25138   | 4370   |
| 0 | 0 | 1527242 | 2    | 1402045 | 709     | 154    |
| 0 | 0 | 1608435 | 508  | 1653335 | 98151   | 50650  |
| 0 | 0 | 1670720 | 9733 | 1392326 | 6048    | 997    |
| 0 | 0 | 1572091 | 40   | 1881203 | 10332   | 1937   |
| 0 | 0 | 1573141 | 288  | 1402453 | 815     | 192    |
| 0 | 0 | 1586271 | 3    | 1602224 | 1304    | 275    |
| 0 | 0 | 1499066 | 5    | 1337188 | 6920    | 1125   |
| 0 | 0 | 1567044 | 332  | 1725173 | 27227   | 4747   |
| 0 | 0 | 1647341 | 9    | 1673371 | 4003    | 698    |
| 0 | 0 | 1513618 | 1339 | 1347103 | 1081    | 246    |
| 0 | 0 | 1640000 | 776  | 1685102 | 16664   | 2759   |
| 0 | 0 | 1603165 | 16   | 1472590 | 75236   | 18182  |
| 0 | 0 | 1504142 | 10   | 1521197 | 2383    | 445    |
| 0 | 0 | 1416072 | 1408 | 1293104 | 2941    | 644    |
| 0 | 0 | 1300750 | 1    | 1244778 | 790     | 178    |
| 0 | 0 | 1675921 | 7    | 2092959 | 18098   | 2855   |
| 0 | 0 | 1351064 | 1    | 1215816 | 1890    | 358    |

|   |   |         |        |         |        |       |
|---|---|---------|--------|---------|--------|-------|
| 0 | 0 | 1556814 | 6      | 1496672 | 4538   | 711   |
| 0 | 0 | 1584567 | 1346   | 1611026 | 2339   | 392   |
| 0 | 0 | 1575402 | 22     | 1534534 | 784    | 195   |
| 0 | 0 | 1491901 | 76     | 1764556 | 84071  | 29095 |
| 0 | 0 | 1472077 | 2      | 1644326 | 4226   | 758   |
| 0 | 0 | 1569916 | 41     | 1901778 | 215218 | 65363 |
| 0 | 0 | 1454643 | 3644   | 1195962 | 4120   | 718   |
| 0 | 0 | 1661435 | 100122 | 1405963 | 11586  | 2281  |
| 0 | 0 | 1426569 | 3168   | 1519925 | 1308   | 267   |
| 0 | 0 | 1502087 | 8      | 1737015 | 6456   | 1182  |
| 0 | 0 | 2952151 | 2637   | 337     | 4404   | 11869 |
| 0 | 0 | 1366522 | 50     | 1438995 | 40166  | 9493  |

Mean Raw CPS background NOT subtracted.

GLITTER!: Mean Raw C

| Pb206 | Pb207 | Pb208 | Th232 | U238   | Analysis_# | Pb206 |
|-------|-------|-------|-------|--------|------------|-------|
| 671   | 153   | 169   | 2461  | 5765   | CIL1       | 663   |
| 9969  | 1832  | 269   | 5243  | 97151  | CIL2       | 9966  |
| 12024 | 11183 | 1467  | 6166  | 21661  | CIL3       | 12022 |
| 3545  | 951   | 516   | 6018  | 23440  | CIL4       | 3542  |
| 193   | 46    | 20    | 320   | 6290   | CIL5       | 191   |
| 769   | 246   | 331   | 2717  | 2998   | CIL6       | 766   |
| 41    | 31    | 15    | 6527  | 15903  | CIL7       | 37    |
| 1826  | 289   | 163   | 8982  | 61967  | CIL8       | 1825  |
| 40    | 15    | 15    | 6876  | 17218  | CIL9       | 37    |
| 1267  | 208   | 407   | 11606 | 18528  | CIL10      | 1264  |
| 2994  | 602   | 222   | 3349  | 31100  | CIL11      | 2991  |
| 33    | 15    | 15    | 6322  | 16232  | CIL12      | 30    |
| 473   | 102   | 107   | 3932  | 10756  | CIL13      | 470   |
| 2973  | 1392  | 594   | 4394  | 9620   | CIL14      | 2970  |
| 13192 | 6399  | 1769  | 11616 | 38420  | CIL15      | 13189 |
| 1126  | 176   | 66    | 4874  | 43934  | CIL16      | 1123  |
| 2033  | 354   | 229   | 6174  | 29206  | CIL17      | 2029  |
| 8805  | 4597  | 1325  | 8204  | 23817  | CIL18      | 8802  |
| 1253  | 305   | 324   | 4913  | 8349   | CIL19      | 1250  |
| 3732  | 625   | 323   | 9619  | 59616  | CIL20      | 3728  |
| 1542  | 227   | 124   | 8407  | 58205  | CIL21      | 1539  |
| 803   | 152   | 181   | 4113  | 9359   | CIL22      | 800   |
| 914   | 158   | 167   | 10722 | 30388  | CIL23      | 909   |
| 556   | 86    | 89    | 6303  | 22109  | CIL24      | 553   |
| 1417  | 315   | 338   | 5664  | 10976  | CIL25      | 1415  |
| 19876 | 7077  | 1142  | 12756 | 212288 | CIL26      | 18302 |
| 19626 | 9539  | 1159  | 13813 | 82465  | CIL27      | 19624 |
| 9589  | 3085  | 935   | 9018  | 40060  | CIL28      | 9588  |
| 150   | 89    | 66    | 12479 | 33865  | CIL29      | 148   |
| 6447  | 2804  | 915   | 7235  | 20664  | CIL30      | 6445  |
| 1943  | 346   | 620   | 19560 | 28326  | CIL31      | 1941  |



|       |       |      |       |         |       |       |
|-------|-------|------|-------|---------|-------|-------|
| 1281  | 304   | 528  | 8157  | 9009    | CIL32 | 1279  |
| 16111 | 7706  | 777  | 8875  | 70687   | CIL33 | 16108 |
| 921   | 245   | 458  | 6892  | 6479    | CIL34 | 919   |
| 15825 | 4281  | 767  | 13189 | 89133   | CIL35 | 15822 |
| 8077  | 1638  | 666  | 12767 | 66761   | CIL36 | 8075  |
| 5671  | 1181  | 139  | 3816  | 51607   | CIL37 | 5669  |
| 1574  | 342   | 467  | 7677  | 10957   | CIL38 | 1572  |
| 1092  | 201   | 246  | 7725  | 15130   | CIL39 | 1090  |
| 12242 | 2986  | 1356 | 18128 | 70044   | CIL40 | 12239 |
| 2642  | 429   | 333  | 11533 | 55989   | CIL41 | 2640  |
| 3244  | 826   | 579  | 7540  | 20478   | CIL42 | 3242  |
| 2006  | 369   | 141  | 3200  | 26259   | CIL43 | 2004  |
| 241   | 40    | 56   | 3921  | 9078    | CIL44 | 238   |
| 935   | 193   | 267  | 4430  | 6949    | CIL45 | 931   |
| 25278 | 10871 | 4456 | 33844 | 76280   | CIL46 | 25275 |
| 6168  | 833   | 768  | 70411 | 900864  | CIL47 | 6166  |
| 683   | 100   | 194  | 17623 | 27020   | CIL48 | 681   |
| 1084  | 248   | 165  | 2597  | 7601    | CIL49 | 1082  |
| 64    | 19    | 24   | 22749 | 47949   | CIL50 | 61    |
| 1252  | 171   | 191  | 16009 | 48649   | CIL51 | 1251  |
| 1240  | 232   | 894  | 30673 | 20220   | CIL52 | 1238  |
| 6787  | 2831  | 1506 | 14635 | 27974   | CIL53 | 6785  |
| 2485  | 706   | 527  | 5946  | 11841   | CIL54 | 2482  |
| 400   | 75    | 81   | 6266  | 15827   | CIL55 | 396   |
| 4434  | 685   | 714  | 26484 | 71557   | CIL56 | 4430  |
| 653   | 88    | 96   | 9890  | 31774   | CIL57 | 650   |
| 5937  | 1050  | 1089 | 75395 | 777141  | CIL58 | 5934  |
| 165   | 35    | 51   | 65966 | 98060   | CIL59 | 162   |
| 3477  | 1203  | 612  | 5789  | 15013   | CIL60 | 3475  |
| 660   | 103   | 216  | 3984  | 10893   | CIL61 | 657   |
| 827   | 136   | 187  | 8249  | 19874   | CIL62 | 824   |
| 2056  | 287   | 279  | 15146 | 53426   | CIL63 | 2053  |
| 1696  | 231   | 522  | 44969 | 66084   | CIL64 | 1692  |
| 3017  | 472   | 1031 | 35607 | 47375   | CIL65 | 3015  |
| 2113  | 590   | 420  | 4492  | 9924    | CIL66 | 2109  |
| 3868  | 562   | 230  | 48764 | 1204783 | CIL67 | 3864  |
| 5816  | 1713  | 944  | 8972  | 24149   | CIL68 | 5814  |
| 1300  | 218   | 525  | 18757 | 21972   | CIL69 | 1297  |
| 32786 | 13882 | 3826 | 37962 | 115658  | CIL70 | 32781 |
| 2192  | 381   | 392  | 16513 | 42587   | CIL71 | 2189  |
| 399   | 63    | 106  | 7667  | 13477   | CIL72 | 396   |
| 2428  | 393   | 189  | 5911  | 35925   | CIL73 | 2423  |
| 7627  | 1978  | 1473 | 17093 | 41441   | CIL74 | 7624  |
| 3536  | 689   | 375  | 7347  | 34462   | CIL75 | 3530  |
| 447   | 278   | 288  | 17374 | 27908   | CIL76 | 443   |
| 2482  | 541   | 748  | 12335 | 17459   | CIL77 | 2478  |
| 8177  | 1392  | 229  | 6249  | 93924   | CIL78 | 8174  |
| 15276 | 5776  | 1287 | 12172 | 63429   | CIL79 | 15273 |
| 3076  | 472   | 106  | 3327  | 46885   | CIL80 | 3073  |
| 144   | 27    | 48   | 17372 | 25617   | CIL81 | 141   |
| 13911 | 2590  | 513  | 10490 | 128194  | CIL82 | 13907 |

|       |      |      |       |        |       |       |
|-------|------|------|-------|--------|-------|-------|
| 2494  | 505  | 311  | 5791  | 20975  | CIL83 | 2490  |
| 18890 | 3689 | 1271 | 23348 | 167864 | CIL84 | 18886 |
| 9228  | 1747 | 953  | 17816 | 79303  | CIL85 | 9225  |
| 7894  | 1380 | 816  | 18364 | 81744  | CIL86 | 7890  |
| 1354  | 244  | 280  | 7362  | 16319  | CIL87 | 1348  |
| 3908  | 740  | 598  | 9547  | 26868  | CIL88 | 3904  |
| 290   | 57   | 80   | 11527 | 24828  | CIL89 | 286   |
| 5262  | 950  | 764  | 15796 | 48945  | CIL90 | 5259  |

Mean Raw CPS background NOT subtracted.

GLITTER!: Mean Raw C

| Pb206 | Pb207 | Pb208 | Th232 | U238   | Analysis_# | Pb206 |
|-------|-------|-------|-------|--------|------------|-------|
| 191   | 29    | 70    | 11650 | 18776  | BAY1       | 189   |
| 100   | 88    | 87    | 7919  | 11416  | BAY2       | 98    |
| 2364  | 462   | 615   | 12088 | 20132  | BAY3       | 2362  |
| 184   | 73    | 87    | 7761  | 16325  | BAY4       | 180   |
| 5422  | 2329  | 1864  | 32283 | 27345  | BAY5       | 5416  |
| 284   | 45    | 46    | 3299  | 9512   | BAY6       | 281   |
| 251   | 43    | 67    | 13261 | 22080  | BAY7       | 247   |
| 247   | 97    | 84    | 3584  | 12752  | BAY8       | 243   |
| 393   | 51    | 98    | 18399 | 33923  | BAY9       | 390   |
| 5629  | 1053  | 174   | 3387  | 48525  | BAY10      | 5625  |
| 2794  | 377   | 597   | 54543 | 121110 | BAY11      | 2791  |
| 218   | 38    | 44    | 10842 | 24889  | BAY12      | 215   |
| 1730  | 220   | 230   | 11809 | 54082  | BAY13      | 1726  |
| 2340  | 290   | 476   | 23560 | 71102  | BAY14      | 2336  |
| 3404  | 412   | 609   | 30447 | 105918 | BAY15      | 3400  |
| 1441  | 184   | 167   | 8967  | 49467  | BAY16      | 1436  |
| 872   | 112   | 237   | 21134 | 49967  | BAY17      | 867   |
| 480   | 66    | 155   | 19799 | 39857  | BAY18      | 476   |
| 4305  | 800   | 740   | 7990  | 25808  | BAY19      | 4301  |
| 468   | 106   | 133   | 11034 | 31241  | BAY20      | 464   |
| 788   | 101   | 125   | 12812 | 56596  | BAY21      | 785   |
| 1033  | 135   | 127   | 6882  | 31141  | BAY22      | 1028  |
| 1708  | 265   | 615   | 13965 | 23743  | BAY23      | 1701  |
| 2971  | 368   | 524   | 29483 | 109278 | BAY24      | 2966  |
| 115   | 22    | 29    | 6443  | 23350  | BAY25      | 110   |
| 198   | 32    | 57    | 5842  | 15075  | BAY26      | 194   |
| 6387  | 800   | 837   | 38589 | 183806 | BAY27      | 6382  |
| 502   | 67    | 136   | 15387 | 37879  | BAY28      | 498   |
| 384   | 53    | 122   | 15015 | 30568  | BAY29      | 379   |
| 3311  | 466   | 251   | 5850  | 48617  | BAY30      | 3306  |
| 1677  | 216   | 189   | 11374 | 66930  | BAY31      | 1672  |
| 3267  | 411   | 433   | 17885 | 87243  | BAY32      | 3263  |
| 3981  | 505   | 548   | 31728 | 149344 | BAY33      | 3977  |
| 332   | 49    | 68    | 4837  | 16771  | BAY34      | 327   |
| 931   | 127   | 639   | 16161 | 13802  | BAY35      | 927   |
| 1132  | 153   | 202   | 21444 | 77353  | BAY36      | 1127  |

|      |      |      |        |        |       |      |
|------|------|------|--------|--------|-------|------|
| 91   | 20   | 39   | 10030  | 22153  | BAY37 | 88   |
| 255  | 35   | 56   | 6386   | 19213  | BAY38 | 249  |
| 8443 | 1644 | 940  | 10114  | 59743  | BAY39 | 8440 |
| 2528 | 368  | 311  | 6582   | 32192  | BAY40 | 2523 |
| 1083 | 150  | 315  | 7064   | 15690  | BAY41 | 1078 |
| 1630 | 221  | 248  | 12617  | 56250  | BAY42 | 1628 |
| 9267 | 1341 | 5298 | 112045 | 119761 | BAY43 | 9262 |
| 322  | 47   | 58   | 6311   | 24950  | BAY44 | 317  |
| 762  | 103  | 182  | 7005   | 19569  | BAY45 | 760  |
| 226  | 38   | 47   | 3801   | 14265  | BAY46 | 223  |
| 656  | 81   | 121  | 25909  | 86638  | BAY47 | 650  |
| 525  | 69   | 111  | 14086  | 41996  | BAY48 | 519  |
| 0    | 26   | 0    | 26     | 0      | BAY49 | 0    |
| 1298 | 153  | 322  | 38739  | 97289  | BAY50 | 1294 |
| 957  | 118  | 158  | 8992   | 38011  | BAY51 | 952  |
| 376  | 50   | 78   | 9259   | 34560  | BAY52 | 371  |
| 120  | 19   | 28   | 7704   | 27917  | BAY53 | 115  |
| 924  | 110  | 183  | 32426  | 102022 | BAY54 | 920  |
| 298  | 46   | 72   | 9099   | 22998  | BAY55 | 294  |
| 510  | 60   | 98   | 8164   | 27166  | BAY56 | 506  |
| 161  | 26   | 27   | 7390   | 39549  | BAY57 | 156  |
| 7248 | 1166 | 1290 | 19099  | 65237  | BAY58 | 7243 |
| 1153 | 147  | 464  | 64985  | 98662  | BAY59 | 1149 |
| 4629 | 639  | 966  | 23401  | 65358  | BAY60 | 4626 |
| 499  | 91   | 114  | 3710   | 12279  | BAY61 | 495  |
| 1141 | 138  | 132  | 18574  | 104368 | BAY62 | 1136 |
| 645  | 80   | 226  | 37730  | 67988  | BAY63 | 642  |
| 1264 | 246  | 670  | 8372   | 9475   | BAY64 | 1261 |
| 392  | 49   | 85   | 12701  | 41545  | BAY65 | 388  |
| 944  | 122  | 110  | 6833   | 32473  | BAY66 | 939  |
| 7008 | 1606 | 1779 | 15086  | 32651  | BAY67 | 7006 |

GLITTER!: Mean Raw CPS background NOT subtracted.

| Th232/U23 | U238/Si29 | Si29    | La139 | Hf177   | Pb206  | Pb207 |
|-----------|-----------|---------|-------|---------|--------|-------|
| 0         | 0         | 1159879 | 45    | 1402885 | 131424 | 20509 |
| 0         | 0         | 1219871 | 5     | 2015032 | 301073 | 24623 |
| 0         | 0         | 280090  | 5     | 15745   | 2835   | 1686  |
| 0         | 0         | 1160128 | 5     | 1683609 | 41260  | 2558  |
| 0         | 0         | 1111168 | 3     | 1606226 | 201190 | 16650 |
| 0         | 0         | 1234931 | 85    | 1302671 | 7548   | 840   |
| 0         | 0         | 1147303 | 2575  | 1400681 | 62443  | 7805  |
| 0         | 0         | 1168111 | 7     | 1355624 | 12630  | 736   |
| 0         | 0         | 1135792 | 3     | 1451050 | 84438  | 8646  |
| 0         | 0         | 1072180 | 10488 | 1382257 | 41809  | 2342  |
| 0         | 0         | 1053269 | 3     | 1456557 | 14484  | 849   |
| 0         | 0         | 1053120 | 12    | 1247936 | 7898   | 474   |
| 0         | 0         | 1086950 | 11    | 1766932 | 217727 | 16144 |

|   |   |         |       |         |         |        |
|---|---|---------|-------|---------|---------|--------|
| 0 | 0 | 1033777 | 2     | 1361881 | 66914   | 4206   |
| 0 | 0 | 1064300 | 10    | 1598733 | 217164  | 15898  |
| 0 | 0 | 1061094 | 9     | 1176887 | 6762    | 490    |
| 0 | 0 | 1067868 | 25    | 1629204 | 522676  | 60718  |
| 0 | 0 | 1048725 | 10    | 1493772 | 32495   | 1938   |
| 0 | 0 | 1043125 | 2     | 1473759 | 163983  | 9823   |
| 0 | 0 | 1047980 | 7     | 1195485 | 14315   | 850    |
| 0 | 0 | 1062576 | 42    | 1530804 | 39398   | 2172   |
| 0 | 0 | 1073757 | 6     | 1500618 | 109197  | 7512   |
| 0 | 0 | 1114980 | 63    | 1040174 | 207182  | 15095  |
| 0 | 0 | 1055329 | 7     | 1155913 | 74547   | 4179   |
| 0 | 0 | 1105064 | 9     | 1733663 | 251665  | 20473  |
| 0 | 0 | 1065010 | 2     | 1483289 | 37519   | 2139   |
| 0 | 0 | 1083876 | 32    | 2938492 | 4356245 | 672721 |
| 0 | 0 | 1086307 | 34    | 1427992 | 4246    | 598    |
| 0 | 0 | 1030253 | 4     | 1598034 | 25737   | 1317   |
| 0 | 0 | 1015899 | 22    | 1403378 | 17512   | 943    |
| 0 | 0 | 1131482 | 54    | 1135355 | 59227   | 3447   |
| 0 | 0 | 1047615 | 2123  | 1294204 | 26962   | 1779   |
| 0 | 0 | 1067269 | 867   | 1437331 | 184331  | 21793  |
| 0 | 0 | 1110672 | 126   | 1544804 | 251634  | 21702  |
| 0 | 0 | 1239361 | 190   | 1655896 | 140313  | 7564   |
| 0 | 0 | 1189236 | 40    | 1959566 | 1032079 | 117006 |
| 0 | 0 | 1299365 | 4728  | 248     | 103758  | 81505  |
| 0 | 0 | 1074867 | 3     | 1407855 | 10324   | 576    |
| 0 | 0 | 1188804 | 3     | 1859020 | 176134  | 11166  |
| 0 | 0 | 1173722 | 5     | 1476613 | 44479   | 2694   |
| 0 | 0 | 1191961 | 13    | 1397062 | 13785   | 717    |
| 0 | 0 | 1247583 | 9     | 1665728 | 22511   | 1227   |
| 0 | 0 | 1250568 | 264   | 1670895 | 49777   | 3659   |
| 0 | 0 | 1289354 | 38    | 1471082 | 1673224 | 138105 |
| 0 | 0 | 1229271 | 3     | 1560245 | 8270    | 479    |
| 0 | 0 | 1198753 | 36    | 1649010 | 868124  | 143942 |
| 0 | 0 | 1170756 | 3     | 1677038 | 17758   | 1459   |
| 0 | 0 | 1109405 | 188   | 1388372 | 29334   | 2021   |
| 0 | 0 | 1232228 | 4     | 1479656 | 16778   | 954    |
| 0 | 0 | 1173969 | 8     | 1545853 | 69592   | 3885   |
| 0 | 0 | 1165052 | 706   | 1562534 | 235905  | 31996  |
| 0 | 0 | 1002987 | 4     | 1241982 | 20164   | 1311   |
| 0 | 0 | 1062470 | 14    | 1131330 | 5138    | 316    |
| 0 | 0 | 1144505 | 20    | 1452572 | 63641   | 4056   |
| 0 | 0 | 1230823 | 11075 | 2139777 | 390162  | 31319  |
| 0 | 0 | 254416  | 3244  | 45      | 17166   | 13940  |
| 0 | 0 | 1084491 | 3     | 1476945 | 249044  | 27484  |
| 0 | 0 | 1229830 | 11    | 1849004 | 132786  | 7006   |
| 0 | 0 | 1210403 | 27    | 1397745 | 10141   | 606    |
| 0 | 0 | 1124741 | 16    | 1279183 | 85192   | 6117   |
| 0 | 0 | 1059643 | 27    | 1326270 | 35105   | 1989   |
| 0 | 0 | 1262807 | 12    | 1865858 | 15011   | 856    |
| 0 | 0 | 1186021 | 5     | 1566704 | 9087    | 595    |
| 0 | 0 | 1185034 | 17    | 1064860 | 15325   | 837    |

|   |   |         |      |         |        |       |
|---|---|---------|------|---------|--------|-------|
| 0 | 0 | 1198382 | 1120 | 1633562 | 195578 | 12291 |
| 0 | 0 | 1307756 | 32   | 1766500 | 164305 | 9064  |
| 0 | 0 | 1226922 | 945  | 1722309 | 68151  | 4981  |
| 0 | 0 | 1074564 | 114  | 1143457 | 48051  | 2818  |
| 0 | 0 | 1024709 | 51   | 1398670 | 9281   | 592   |
| 0 | 0 | 1109713 | 13   | 1344405 | 26175  | 1421  |
| 0 | 0 | 1122448 | 109  | 1776706 | 583675 | 69193 |
| 0 | 0 | 1041037 | 4    | 1416812 | 48734  | 2673  |
| 0 | 0 | 1099310 | 4    | 1634382 | 256137 | 31565 |
| 0 | 0 | 1095646 | 21   | 1447419 | 63051  | 3520  |
| 0 | 0 | 1057438 | 1    | 1304733 | 7453   | 401   |
| 0 | 0 | 1096288 | 41   | 1400972 | 52652  | 2925  |
| 0 | 0 | 1147373 | 4383 | 1047038 | 32032  | 9491  |
| 0 | 0 | 1181134 | 4    | 1613192 | 239397 | 27635 |
| 0 | 0 | 977114  | 2    | 1565293 | 295513 | 32513 |
| 0 | 0 | 973779  | 20   | 1137994 | 7842   | 474   |
| 0 | 0 | 1059809 | 762  | 1177496 | 70402  | 5258  |
| 0 | 0 | 1004935 | 5    | 1153001 | 7291   | 561   |
| 0 | 0 | 1053455 | 3    | 1751726 | 140864 | 9228  |
| 0 | 0 | 1051052 | 6    | 1443712 | 8380   | 591   |
| 0 | 0 | 1102000 | 33   | 1491037 | 82357  | 6029  |
| 0 | 0 | 1230973 | 162  | 1130933 | 92958  | 9935  |
| 0 | 0 | 1111164 | 5    | 1556561 | 68697  | 5641  |

GLITTER!: Mean Raw CPS background NOT subtracted.

| Th232/U23 | U238/Si29 | Si29    | La139   | Hf177   | Pb206  | Pb207 |
|-----------|-----------|---------|---------|---------|--------|-------|
| 0         | 0         | 1120504 | 856     | 1887222 | 457650 | 77859 |
| 0         | 0         | 3040596 | 11867   | 4361971 | 161330 | 10155 |
| 0         | 0         | 2940203 | 24      | 5373695 | 42795  | 2344  |
| 0         | 0         | 989650  | 602     | 1719166 | 107360 | 9008  |
| 0         | 0         | 995944  | 19      | 1672250 | 51861  | 3338  |
| 0         | 0         | 1041791 | 15      | 1770081 | 165078 | 18399 |
| 0         | 0         | 1029400 | 339     | 2049165 | 23203  | 2768  |
| 0         | 0         | 1011428 | 2       | 1734186 | 11291  | 631   |
| 0         | 0         | 1046992 | 63      | 1778896 | 29781  | 1526  |
| 0         | 0         | 1026963 | 5       | 2392265 | 129276 | 7073  |
| 0         | 0         | 1071177 | 35      | 1948389 | 44265  | 2394  |
| 0         | 0         | 1072903 | 592     | 1903406 | 58266  | 4729  |
| 0         | 0         | 1192934 | 1722    | 2605304 | 25917  | 1380  |
| 0         | 0         | 832515  | 1355712 | 1527969 | 303862 | 22523 |
| 0         | 0         | 878748  | 27893   | 3118    | 29724  | 19770 |
| 0         | 0         | 1032421 | 8       | 1645161 | 10657  | 611   |
| 0         | 0         | 1070807 | 9       | 2317852 | 230896 | 16031 |
| 0         | 0         | 993650  | 1       | 1972289 | 60822  | 4540  |
| 0         | 0         | 963897  | 0       | 1902857 | 18065  | 994   |
| 0         | 0         | 997993  | 62      | 1718772 | 4590   | 315   |

|   |   |         |       |         |        |       |
|---|---|---------|-------|---------|--------|-------|
| 0 | 0 | 883834  | 23    | 1697249 | 10858  | 1640  |
| 0 | 0 | 943701  | 6     | 2104746 | 40807  | 2300  |
| 0 | 0 | 1024367 | 73    | 1655801 | 36910  | 1990  |
| 0 | 0 | 945777  | 128   | 1832056 | 108302 | 6067  |
| 0 | 0 | 944523  | 32    | 1736420 | 58836  | 5180  |
| 0 | 0 | 990173  | 23    | 1404179 | 17882  | 1019  |
| 0 | 0 | 969667  | 3     | 2327356 | 45627  | 2437  |
| 0 | 0 | 1010359 | 93    | 1050925 | 13822  | 1530  |
| 0 | 0 | 1002866 | 321   | 1568614 | 15953  | 1213  |
| 0 | 0 | 1073074 | 3     | 1880967 | 142787 | 8642  |
| 0 | 0 | 1011055 | 0     | 2363465 | 74804  | 3976  |
| 0 | 0 | 1021352 | 2     | 2135214 | 57401  | 3151  |
| 0 | 0 | 1109381 | 971   | 2098282 | 60689  | 3590  |
| 0 | 0 | 1030448 | 3     | 1869101 | 99438  | 7589  |
| 0 | 0 | 727722  | 47025 | 760     | 32658  | 26858 |
| 0 | 0 | 1016735 | 9     | 2568880 | 24163  | 1246  |
| 0 | 0 | 1059316 | 36    | 2555491 | 227487 | 14930 |
| 0 | 0 | 1058351 | 3839  | 2174511 | 176990 | 14116 |
| 0 | 0 | 1017332 | 4786  | 2069469 | 99987  | 5340  |
| 0 | 0 | 960531  | 3     | 933715  | 5891   | 365   |
| 0 | 0 | 945195  | 28    | 1460509 | 12908  | 791   |
| 0 | 0 | 982097  | 727   | 1910532 | 32347  | 1681  |
| 0 | 0 | 961406  | 173   | 2005235 | 311243 | 26264 |
| 0 | 0 | 1013306 | 53    | 1731905 | 14622  | 851   |
| 0 | 0 | 934376  | 2304  | 1777085 | 1937   | 144   |
| 0 | 0 | 945831  | 0     | 1854939 | 14216  | 794   |
| 0 | 0 | 938546  | 15869 | 1801200 | 273076 | 30423 |
| 0 | 0 | 984341  | 41    | 1725425 | 12420  | 700   |
| 0 | 0 | 951724  | 4363  | 1337782 | 46780  | 5409  |
| 0 | 0 | 971819  | 19    | 1811989 | 132579 | 8468  |
| 0 | 0 | 1026768 | 5     | 2171241 | 205418 | 12452 |
| 0 | 0 | 1010727 | 82732 | 1930704 | 27565  | 2990  |
| 0 | 0 | 941549  | 8     | 1931875 | 99272  | 6562  |
| 0 | 0 | 1061686 | 29    | 2095816 | 224584 | 24195 |
| 0 | 0 | 948902  | 28259 | 1674798 | 73279  | 4963  |
| 0 | 0 | 913769  | 15    | 1256926 | 6295   | 335   |
| 0 | 0 | 974458  | 44    | 1672439 | 87037  | 6210  |
| 0 | 0 | 923742  | 39    | 1610078 | 58377  | 2935  |
| 0 | 0 | 1067760 | 5258  | 1581259 | 50726  | 3220  |
| 0 | 0 | 984275  | 56    | 1707326 | 47107  | 2667  |
| 0 | 0 | 1024885 | 60    | 1991058 | 66895  | 3674  |
| 0 | 0 | 1037345 | 555   | 1773727 | 85589  | 6657  |
| 0 | 0 | 990167  | 57    | 1839353 | 47663  | 3059  |
| 0 | 0 | 1032831 | 15    | 2014085 | 57094  | 3286  |
| 0 | 0 | 957244  | 4     | 1410029 | 2668   | 184   |
| 0 | 0 | 1025764 | 16    | 1686761 | 31918  | 2281  |
| 0 | 0 | 114381  | 6811  | 6972    | 23352  | 18940 |
| 0 | 0 | 895202  | 67    | 1008352 | 10862  | 853   |
| 0 | 0 | 955172  | 8     | 1078091 | 2854   | 178   |
| 0 | 0 | 857126  | 982   | 1615015 | 55564  | 5427  |
| 0 | 0 | 918360  | 6     | 2095404 | 345804 | 25293 |

|   |   |         |     |         |        |       |
|---|---|---------|-----|---------|--------|-------|
| 0 | 0 | 978339  | 14  | 1705665 | 21980  | 1395  |
| 0 | 0 | 908792  | 71  | 1361743 | 127207 | 10034 |
| 0 | 0 | 914916  | 35  | 1326124 | 15659  | 1087  |
| 0 | 0 | 850193  | 5   | 1496655 | 181107 | 26966 |
| 0 | 0 | 880176  | 145 | 1697131 | 23469  | 1183  |
| 0 | 0 | 933850  | 13  | 2005255 | 127493 | 11177 |
| 0 | 0 | 981469  | 16  | 1655399 | 148038 | 24307 |
| 0 | 0 | 1107225 | 4   | 1999648 | 589811 | 44647 |
| 0 | 0 | 1098606 | 4   | 1775415 | 6598   | 368   |
| 0 | 0 | 1100733 | 9   | 2187366 | 138959 | 8831  |
| 0 | 0 | 1157156 | 9   | 2067003 | 39722  | 2214  |
| 0 | 0 | 1053618 | 5   | 2027936 | 119745 | 8936  |
| 0 | 0 | 1018537 | 4   | 1702165 | 76391  | 4637  |
| 0 | 0 | 823262  | 3   | 1529251 | 24495  | 1971  |

GLITTER!: Mean Raw CPS background NOT subtracted.

| Th232/U23 | U238/Si29 | Si29    | La139 | Hf177   | Pb206  | Pb207 |
|-----------|-----------|---------|-------|---------|--------|-------|
| 0         | 0         | 2163571 | 266   | 1561518 | 2145   | 475   |
| 0         | 0         | 2209763 | 71    | 1705849 | 25260  | 3983  |
| 0         | 0         | 2201322 | 5     | 2252352 | 21397  | 3384  |
| 0         | 0         | 2149638 | 4     | 1446896 | 121401 | 64945 |
| 0         | 0         | 2123408 | 2     | 1412163 | 4871   | 919   |
| 0         | 0         | 2157606 | 411   | 1773772 | 11814  | 1959  |
| 0         | 0         | 2063505 | 6     | 1434447 | 4001   | 693   |
| 0         | 0         | 2000186 | 4     | 1818905 | 10819  | 1736  |
| 0         | 0         | 1985703 | 419   | 1595388 | 38469  | 9140  |
| 0         | 0         | 1979472 | 179   | 1724370 | 30850  | 7457  |
| 0         | 0         | 1984948 | 3374  | 1058550 | 10820  | 1748  |
| 0         | 0         | 1974448 | 2     | 1635935 | 15731  | 2498  |
| 0         | 0         | 1737100 | 45    | 1264624 | 5826   | 1294  |
| 0         | 0         | 1945065 | 6     | 1721140 | 16177  | 3986  |
| 0         | 0         | 1924941 | 10    | 1989498 | 54531  | 9908  |
| 0         | 0         | 1769776 | 26    | 996463  | 1990   | 395   |
| 0         | 0         | 1978637 | 1     | 1680652 | 29571  | 6830  |
| 0         | 0         | 1975613 | 21    | 1971778 | 60395  | 13995 |
| 0         | 0         | 1926130 | 409   | 1434355 | 21486  | 3980  |
| 0         | 0         | 1872511 | 2     | 1661157 | 20248  | 5005  |
| 0         | 0         | 1853599 | 3     | 1844202 | 55419  | 8498  |
| 0         | 0         | 1865471 | 23    | 1648351 | 38948  | 12123 |
| 0         | 0         | 1951396 | 11    | 1769212 | 8195   | 1336  |
| 0         | 0         | 1924678 | 159   | 1806843 | 34417  | 6732  |
| 0         | 0         | 1865427 | 7     | 1623241 | 21701  | 3767  |
| 0         | 0         | 1840884 | 55    | 1748276 | 6519   | 1268  |
| 0         | 0         | 1901719 | 590   | 1540209 | 100492 | 30700 |
| 0         | 0         | 1851929 | 2     | 2110264 | 73344  | 22508 |
| 0         | 0         | 2009432 | 753   | 2219674 | 32476  | 5954  |
| 0         | 0         | 1781366 | 14    | 1455291 | 38202  | 21080 |

|   |   |         |       |         |        |        |
|---|---|---------|-------|---------|--------|--------|
| 0 | 0 | 1986139 | 4177  | 1744010 | 7602   | 1688   |
| 0 | 0 | 1803692 | 251   | 1930735 | 16818  | 2914   |
| 0 | 0 | 1732612 | 5     | 1496317 | 18123  | 3354   |
| 0 | 0 | 1757083 | 2     | 1542916 | 29395  | 6813   |
| 0 | 0 | 1700747 | 24    | 1360505 | 15558  | 2855   |
| 0 | 0 | 1818416 | 62    | 2002665 | 593229 | 135969 |
| 0 | 0 | 1607613 | 2     | 1377641 | 3372   | 679    |
| 0 | 0 | 1681561 | 1314  | 1585394 | 2839   | 712    |
| 0 | 0 | 1567735 | 2     | 1440826 | 14063  | 3715   |
| 0 | 0 | 1630752 | 3     | 1382825 | 7726   | 1244   |
| 0 | 0 | 1607353 | 813   | 1450115 | 40866  | 12244  |
| 0 | 0 | 1623689 | 1     | 2047595 | 22889  | 4376   |
| 0 | 0 | 1671527 | 154   | 1680338 | 24180  | 4102   |
| 0 | 0 | 1681700 | 1808  | 1682610 | 36204  | 9227   |
| 0 | 0 | 1558709 | 2     | 1624883 | 91023  | 29824  |
| 0 | 0 | 1461179 | 0     | 1172454 | 3030   | 677    |
| 0 | 0 | 1677487 | 349   | 1745665 | 51219  | 8274   |
| 0 | 0 | 1674904 | 2     | 1855983 | 22681  | 3553   |
| 0 | 0 | 1864732 | 5     | 1870380 | 26638  | 4419   |
| 0 | 0 | 1674396 | 0     | 1775447 | 1470   | 331    |
| 0 | 0 | 1752962 | 10    | 2011219 | 25362  | 4161   |
| 0 | 0 | 1743024 | 42    | 1520250 | 32102  | 7729   |
| 0 | 0 | 1687396 | 6     | 1723912 | 4795   | 996    |
| 0 | 0 | 1702130 | 34518 | 1383729 | 7022   | 1991   |
| 0 | 0 | 1637377 | 554   | 1600043 | 1721   | 359    |
| 0 | 0 | 1719809 | 2     | 1750193 | 13061  | 3192   |
| 0 | 0 | 1856216 | 9     | 1886554 | 78480  | 17788  |
| 0 | 0 | 1577983 | 2     | 1542890 | 2853   | 584    |
| 0 | 0 | 1784517 | 8     | 2375272 | 141441 | 31142  |
| 0 | 0 | 1730055 | 10    | 1739865 | 27080  | 5338   |
| 0 | 0 | 1787865 | 2544  | 1810367 | 36597  | 6277   |
| 0 | 0 | 1733346 | 9     | 2392227 | 78020  | 17859  |
| 0 | 0 | 1794840 | 205   | 1760603 | 32874  | 5947   |
| 0 | 0 | 1659189 | 6     | 1684823 | 79829  | 24134  |
| 0 | 0 | 1582792 | 3     | 1693874 | 39566  | 13122  |
| 0 | 0 | 1666802 | 5     | 2216676 | 158657 | 56087  |
| 0 | 0 | 1639919 | 313   | 2113186 | 24994  | 3956   |
| 0 | 0 | 1604983 | 76    | 1575483 | 2600   | 581    |
| 0 | 0 | 1552930 | 153   | 1853239 | 62484  | 23201  |
| 0 | 0 | 1524023 | 607   | 1638110 | 12585  | 2605   |
| 0 | 0 | 1555756 | 3     | 1516665 | 1420   | 317    |
| 0 | 0 | 1685620 | 14    | 2088694 | 23599  | 4906   |
| 0 | 0 | 1691299 | 2483  | 1912445 | 22727  | 3972   |
| 0 | 0 | 1664109 | 2     | 2158813 | 31873  | 4899   |
| 0 | 0 | 1668003 | 732   | 1757933 | 14723  | 3497   |
| 0 | 0 | 1671164 | 7     | 1731094 | 7752   | 1149   |
| 0 | 0 | 1696303 | 28    | 1497225 | 34772  | 7110   |
| 0 | 0 | 1719474 | 252   | 2371274 | 97613  | 20267  |
| 0 | 0 | 1625163 | 3     | 1913091 | 21787  | 3783   |
| 0 | 0 | 1590147 | 79    | 1715556 | 4649   | 3568   |
| 0 | 0 | 1624623 | 14    | 1569210 | 4245   | 951    |



|   |   |         |      |         |        |        |
|---|---|---------|------|---------|--------|--------|
| 0 | 0 | 1771736 | 1    | 2292416 | 21835  | 3807   |
| 0 | 0 | 1635261 | 93   | 1350374 | 52627  | 23803  |
| 0 | 0 | 1725937 | 326  | 1902432 | 24488  | 3980   |
| 0 | 0 | 1657243 | 34   | 1428097 | 1283   | 287    |
| 0 | 0 | 1685663 | 4    | 1553120 | 18304  | 2938   |
| 0 | 0 | 1610382 | 4    | 1330411 | 16990  | 2733   |
| 0 | 0 | 1595280 | 1    | 1873483 | 1635   | 353    |
| 0 | 0 | 1658146 | 1    | 2018667 | 62098  | 15347  |
| 0 | 0 | 1638147 | 2    | 1767028 | 50776  | 9153   |
| 0 | 0 | 1599975 | 91   | 1574797 | 5769   | 1406   |
| 0 | 0 | 1501623 | 14   | 2140800 | 221329 | 118866 |
| 0 | 0 | 1571076 | 1861 | 1951911 | 17202  | 2677   |
| 0 | 0 | 1723226 | 5    | 2265170 | 81485  | 24703  |
| 0 | 0 | 1532309 | 11   | 1538014 | 8855   | 1803   |
| 0 | 0 | 1536711 | 3    | 1718342 | 2337   | 407    |
| 0 | 0 | 1641045 | 2813 | 2010443 | 17462  | 2790   |
| 0 | 0 | 1541329 | 7    | 1939555 | 20143  | 3782   |
| 0 | 0 | 1593354 | 155  | 1510450 | 6415   | 985    |
| 0 | 0 | 1539504 | 7    | 2049670 | 26155  | 4119   |
| 0 | 0 | 1522411 | 42   | 1207971 | 11463  | 1971   |
| 0 | 0 | 1568611 | 1496 | 1908540 | 16209  | 2538   |
| 0 | 0 | 1632251 | 42   | 1817252 | 498    | 205    |
| 0 | 0 | 1549959 | 30   | 1579085 | 10450  | 2147   |
| 0 | 0 | 1667026 | 12   | 1961463 | 35550  | 8172   |
| 0 | 0 | 1312359 | 4    | 1751563 | 25159  | 4236   |
| 0 | 0 | 1532675 | 554  | 1318207 | 1925   | 382    |
| 0 | 0 | 1666884 | 4568 | 1788365 | 15796  | 2526   |
| 0 | 0 | 1733234 | 3    | 2185213 | 70192  | 14878  |
| 0 | 0 | 1721634 | 2    | 2316250 | 96864  | 23520  |
| 0 | 0 | 1652372 | 2    | 2120528 | 106089 | 66954  |
| 0 | 0 | 1763841 | 19   | 2210062 | 131960 | 29055  |
| 0 | 0 | 1658543 | 40   | 1823074 | 16996  | 2914   |
| 0 | 0 | 1631469 | 125  | 1769395 | 5397   | 825    |
| 0 | 0 | 1687019 | 27   | 1215691 | 698    | 131    |
| 0 | 0 | 1690389 | 56   | 1914656 | 17330  | 3110   |
| 0 | 0 | 1666627 | 11   | 1938198 | 28953  | 4440   |
| 0 | 0 | 1631487 | 13   | 1733702 | 8693   | 1326   |
| 0 | 0 | 1890873 | 3    | 2581732 | 56299  | 11943  |
| 0 | 0 | 1640379 | 2    | 2191614 | 294810 | 124108 |

GLITTER!: Mean Raw CPS backgroi

| Pb208  | Th232   | U235  | U238    | Si29    | La139 | Hf177   |
|--------|---------|-------|---------|---------|-------|---------|
| 26249  | 277747  | 1976  | 272174  | 1030650 | 75    | 1611512 |
| 6809   | 135806  | 6088  | 845848  | 1016158 | 4     | 1801021 |
| 61960  | 401853  | 7782  | 1081825 | 1053925 | 355   | 1778862 |
| 19131  | 768947  | 12078 | 1737541 | 1027555 | 4     | 1868872 |
| 21923  | 225779  | 2579  | 360240  | 981179  | 27    | 1836138 |
| 17028  | 248430  | 6564  | 917959  | 997675  | 6     | 2154360 |
| 7255   | 45960   | 441   | 64309   | 632558  | 12835 | 5824    |
| 5251   | 104527  | 326   | 43296   | 847591  | 15147 | 3914    |
| 2054   | 278351  | 4599  | 640715  | 1011964 | 9     | 1544587 |
| 16085  | 269142  | 5336  | 736198  | 968647  | 2     | 1586822 |
| 1657   | 237421  | 2907  | 411510  | 995330  | 5     | 1771927 |
| 4284   | 583375  | 20732 | 2909424 | 1009667 | 57    | 1882889 |
| 12454  | 251301  | 10871 | 1551400 | 1022266 | 85    | 1493555 |
| 43984  | 317321  | 6727  | 938791  | 1022726 | 47    | 1875310 |
| 1559   | 320843  | 4114  | 568250  | 1033427 | 8     | 1742357 |
| 2862   | 516431  | 9359  | 1346538 | 1086881 | 34117 | 1928918 |
| 9570   | 219222  | 12681 | 1802429 | 1053549 | 8     | 2521163 |
| 11863  | 157959  | 3374  | 468081  | 1004804 | 9     | 1716767 |
| 38125  | 424648  | 5928  | 840710  | 1022578 | 9     | 1917790 |
| 1317   | 189701  | 3063  | 428724  | 954127  | 0     | 1718887 |
| 2218   | 317487  | 6515  | 908144  | 1016014 | 123   | 1895554 |
| 11207  | 29571   | 673   | 94787   | 779526  | 13867 | 1956    |
| 4848   | 428102  | 5325  | 755047  | 976475  | 50479 | 1321411 |
| 5160   | 728570  | 16135 | 2269877 | 987049  | 1749  | 1703383 |
| 4608   | 272835  | 2760  | 379436  | 1013047 | 10038 | 1416796 |
| 14352  | 132943  | 5508  | 773058  | 967179  | 3     | 1711614 |
| 10672  | 241054  | 6314  | 878810  | 1084238 | 2     | 2271362 |
| 19152  | 432273  | 3313  | 464050  | 981929  | 163   | 1889657 |
| 7381   | 1046922 | 14770 | 2166959 | 1065450 | 20034 | 1882193 |
| 36394  | 428737  | 5982  | 824709  | 1001310 | 140   | 2053832 |
| 78401  | 614888  | 9930  | 1408712 | 955259  | 3     | 1956935 |
| 5934   | 157533  | 5332  | 741191  | 1059544 | 6     | 1861979 |
| 16531  | 182080  | 4993  | 693017  | 1105753 | 0     | 1353997 |
| 21561  | 539191  | 4184  | 581912  | 1053894 | 13    | 2110820 |
| 7762   | 356820  | 4798  | 662432  | 1059645 | 6     | 1770632 |
| 145609 | 1027846 | 22940 | 3265457 | 1068298 | 43    | 2364902 |
| 6640   | 133730  | 2279  | 319938  | 1088718 | 24    | 1835481 |
| 21998  | 254716  | 628   | 85402   | 1000636 | 2535  | 19277   |
| 12555  | 287016  | 4246  | 587057  | 989260  | 6     | 1924282 |

|       |         |       |         |         |      |         |
|-------|---------|-------|---------|---------|------|---------|
| 3336  | 638180  | 5690  | 799497  | 1023988 | 17   | 1649207 |
| 34224 | 420084  | 13176 | 1858492 | 1129177 | 3    | 2498235 |
| 11926 | 134791  | 1272  | 177246  | 931648  | 48   | 1669763 |
| 43505 | 616108  | 13738 | 1926987 | 984749  | 32   | 2020006 |
| 4619  | 108891  | 2597  | 361313  | 1020705 | 4    | 2037225 |
| 8315  | 1349019 | 16904 | 2369723 | 964294  | 3731 | 1867494 |
| 432   | 0       | 2     | 12      | 0       | 1    | 23      |
| 7409  | 56089   | 1676  | 239416  | 0       | 21   | 860820  |
| 36300 | 106813  | 1907  | 268424  | 706836  | 13   | 1307803 |
| 18673 | 199122  | 3996  | 562325  | 731285  | 8    | 1454682 |
| 1953  | 182820  | 2928  | 407057  | 745258  | 0    | 1411186 |
| 5955  | 71005   | 1745  | 245047  | 792056  | 11   | 1486297 |
| 3320  | 60295   | 1437  | 204646  | 689874  | 1    | 1178562 |
| 1430  | 66657   | 1595  | 228655  | 697737  | 0    | 1096223 |
| 12454 | 158974  | 5629  | 788079  | 749310  | 3    | 1669580 |
| 3239  | 20516   | 637   | 86664   | 736744  | 3    | 1236383 |
| 13863 | 17896   | 886   | 118454  | 821620  | 5199 | 3089    |
| 7141  | 74516   | 2656  | 368432  | 880199  | 18   | 1335982 |
| 2620  | 195876  | 3885  | 544526  | 944185  | 5    | 1590843 |
| 2297  | 170867  | 3243  | 448884  | 851343  | 2    | 1652433 |
| 2571  | 77592   | 1200  | 166251  | 891751  | 119  | 1184127 |
| 6087  | 363485  | 7351  | 1034003 | 854249  | 2954 | 1553609 |
| 31263 | 665591  | 12594 | 1799186 | 917165  | 2511 | 1685769 |
| 2071  | 152476  | 2644  | 380934  | 784373  | 0    | 1484266 |
| 10936 | 76464   | 619   | 89266   | 773161  | 8    | 1060245 |
| 4412  | 31915   | 1343  | 186662  | 758028  | 0    | 1335268 |
| 10596 | 288380  | 7990  | 1138927 | 889566  | 3382 | 1653806 |
| 45386 | 158686  | 4184  | 593999  | 939087  | 40   | 1532750 |
| 4724  | 365686  | 8557  | 1236866 | 961198  | 328  | 1590853 |
| 15053 | 90762   | 2009  | 273266  | 954489  | 2    | 1690517 |
| 10878 | 131194  | 20816 | 2989397 | 987091  | 15   | 2469120 |
| 11251 | 904970  | 11722 | 1675941 | 895215  | 1240 | 1605534 |
| 12879 | 183322  | 7483  | 1089373 | 1025487 | 445  | 2137698 |
| 57125 | 405331  | 22311 | 3229247 | 1016713 | 3    | 2023530 |
| 9962  | 403768  | 8378  | 1169841 | 970865  | 89   | 1600683 |
| 15176 | 7230    | 215   | 31913   | 620253  | 4042 | 7456    |
| 8291  | 193351  | 14537 | 2065171 | 935616  | 10   | 1943920 |
| 4530  | 141040  | 2587  | 365412  | 866030  | 5    | 1450859 |
| 2522  | 184931  | 2601  | 370752  | 848051  | 0    | 1520660 |
| 1590  | 139962  | 4097  | 565013  | 829537  | 7    | 1252641 |

GLITTER!: Mean Raw CPS backgroi

| Pb208 | Th232 | U235 | U238   | Si29     | La139 | Hf177   |
|-------|-------|------|--------|----------|-------|---------|
| 76365 | 13366 | 166  | 16076  | 20808112 | 12616 | 87930   |
| 251   | 5799  | 233  | 31993  | 935041   | 970   | 1450888 |
| 664   | 41120 | 903  | 127320 | 868433   | 1     | 1336685 |

|       |         |      |         |         |      |         |
|-------|---------|------|---------|---------|------|---------|
| 18622 | 69650   | 983  | 138995  | 1093360 | 317  | 1525320 |
| 3629  | 112151  | 1944 | 337436  | 1029538 | 356  | 1738839 |
| 422   | 37218   | 570  | 80882   | 975354  | 1    | 1298501 |
| 681   | 98086   | 1793 | 324359  | 1060673 | 1    | 1588703 |
| 8530  | 54181   | 6950 | 1463518 | 1192024 | 199  | 2241805 |
| 16734 | 228834  | 2487 | 513557  | 1161729 | 16   | 1771774 |
| 870   | 29767   | 2174 | 429064  | 1125353 | 14   | 2050201 |
| 5299  | 66205   | 2385 | 487361  | 1180522 | 1    | 2101307 |
| 1788  | 322990  | 4837 | 1014234 | 891428  | 5963 | 1423737 |
| 7441  | 2100638 | 7814 | 1599700 | 1130535 | 26   | 1649297 |
| 1119  | 114876  | 1250 | 177820  | 1026011 | 7    | 1403358 |
| 243   | 33294   | 725  | 100834  | 970749  | 370  | 1570907 |
| 425   | 55248   | 998  | 141687  | 1016025 | 377  | 1619488 |
| 1270  | 200011  | 2271 | 448303  | 1045559 | 504  | 1648608 |
| 1919  | 66245   | 874  | 122642  | 1046425 | 7    | 1408670 |
| 2264  | 14093   | 101  | 15806   | 983265  | 87   | 1456740 |
| 3688  | 42829   | 1468 | 226214  | 897615  | 0    | 1706586 |
| 870   | 114173  | 2175 | 426010  | 993063  | 2    | 1559942 |
| 316   | 46211   | 894  | 124186  | 974932  | 4    | 1354629 |
| 359   | 51962   | 1004 | 143706  | 1002106 | 18   | 1654492 |
| 303   | 46760   | 1034 | 148766  | 1032599 | 53   | 1506488 |
| 996   | 93793   | 1535 | 214880  | 1021093 | 3    | 1498597 |
| 354   | 40991   | 854  | 114910  | 1121955 | 6709 | 1763011 |
| 22209 | 111282  | 1550 | 239135  | 1115757 | 10   | 1847805 |
| 1210  | 88966   | 1637 | 228171  | 1031844 | 2    | 1573942 |
| 4158  | 143317  | 2218 | 435291  | 1089825 | 61   | 1781763 |
| 6442  | 39090   | 1521 | 209601  | 1064147 | 3    | 1827553 |
| 510   | 13361   | 272  | 39647   | 998149  | 11   | 1532521 |
| 771   | 25041   | 493  | 67038   | 1055113 | 0    | 1687587 |
| 1452  | 15395   | 3935 | 808405  | 1034025 | 2    | 2078769 |
| 194   | 27672   | 526  | 75487   | 1046832 | 11   | 1319241 |
| 1441  | 36064   | 1561 | 242957  | 1072030 | 8    | 1882924 |
| 10894 | 578627  | 6578 | 1378600 | 1119969 | 76   | 1414164 |
| 6879  | 114145  | 1719 | 242600  | 1002230 | 52   | 1345696 |
| 140   | 23827   | 610  | 88665   | 984945  | 1    | 1401098 |
| 20524 | 106343  | 1196 | 166387  | 1060262 | 507  | 1653288 |
| 1576  | 191780  | 3472 | 721807  | 1147425 | 9732 | 1392272 |
| 1280  | 44836   | 2088 | 392104  | 1049345 | 39   | 1881149 |
| 289   | 47132   | 724  | 98754   | 1064492 | 287  | 1401888 |
| 331   | 57699   | 1139 | 158601  | 1076345 | 2    | 1602142 |
| 2073  | 71654   | 991  | 142361  | 999738  | 4    | 1337149 |
| 7638  | 147378  | 2206 | 434260  | 1056047 | 332  | 1724668 |
| 965   | 32159   | 597  | 83213   | 1152322 | 8    | 1673295 |
| 368   | 59652   | 970  | 136744  | 1034054 | 1337 | 1346989 |
| 6526  | 281068  | 2406 | 453522  | 1155594 | 776  | 1685052 |
| 21580 | 154135  | 2424 | 482206  | 1115810 | 15   | 1472385 |
| 930   | 141401  | 1677 | 257934  | 1022257 | 10   | 1521162 |
| 801   | 47361   | 932  | 132862  | 945699  | 1407 | 1293038 |
| 191   | 25277   | 592  | 80899   | 835952  | 0    | 1244670 |
| 1819  | 68912   | 3140 | 640515  | 1210867 | 5    | 2092868 |
| 242   | 6341    | 257  | 38580   | 892021  | 0    | 1215792 |

|       |        |      |        |         |        |         |
|-------|--------|------|--------|---------|--------|---------|
| 1051  | 163305 | 3286 | 690223 | 1078225 | 5      | 1496568 |
| 483   | 87429  | 2009 | 324698 | 1120836 | 1345   | 1610980 |
| 272   | 28448  | 622  | 88541  | 1138391 | 21     | 1534495 |
| 16391 | 83436  | 2445 | 502698 | 1048494 | 75     | 1764126 |
| 843   | 25544  | 604  | 83111  | 1039610 | 1      | 1644256 |
| 40330 | 202403 | 4487 | 932479 | 1144214 | 38     | 1901719 |
| 1080  | 38024  | 676  | 95955  | 1028434 | 3643   | 1195879 |
| 2722  | 94352  | 1796 | 307320 | 1236518 | 100120 | 1405617 |
| 414   | 53383  | 851  | 123359 | 1010319 | 3135   | 1519352 |
| 1008  | 15370  | 436  | 60254  | 1085445 | 7      | 1736608 |
| 9805  | 887    | 6    | 955    | 2534397 | 2636   | 259     |
| 4910  | 109159 | 1440 | 205658 | 946896  | 49     | 1438928 |

PS background subtracted.

| Pb207 | Pb208 | Th232 | U238   |
|-------|-------|-------|--------|
| 133   | 157   | 2461  | 5765   |
| 1825  | 263   | 5242  | 97150  |
| 11178 | 1461  | 6166  | 21661  |
| 944   | 510   | 6018  | 23440  |
| 40    | 14    | 320   | 6289   |
| 240   | 327   | 2717  | 2997   |
| 21    | 7     | 6527  | 15903  |
| 281   | 157   | 8982  | 61967  |
| 7     | 9     | 6875  | 17217  |
| 202   | 402   | 11606 | 18528  |
| 594   | 215   | 3348  | 31099  |
| 8     | 9     | 6322  | 16232  |
| 93    | 100   | 3932  | 10755  |
| 1385  | 591   | 4394  | 9619   |
| 6393  | 1764  | 11615 | 38420  |
| 170   | 61    | 4873  | 43934  |
| 346   | 225   | 6173  | 29205  |
| 4590  | 1317  | 8204  | 23816  |
| 296   | 318   | 4912  | 8349   |
| 614   | 317   | 9618  | 59615  |
| 221   | 118   | 8407  | 58205  |
| 144   | 175   | 4113  | 9358   |
| 145   | 157   | 10722 | 30388  |
| 77    | 81    | 6302  | 22109  |
| 311   | 336   | 5664  | 10975  |
| 6556  | 1118  | 12497 | 203662 |
| 9533  | 1156  | 13812 | 82464  |
| 3080  | 932   | 9017  | 40060  |
| 82    | 62    | 12479 | 33864  |
| 2798  | 910   | 7234  | 20664  |
| 341   | 616   | 19560 | 28325  |

|       |      |       |         |
|-------|------|-------|---------|
| 298   | 523  | 8157  | 9009    |
| 7701  | 775  | 8875  | 70686   |
| 241   | 454  | 6891  | 6478    |
| 4277  | 764  | 13189 | 89133   |
| 1633  | 664  | 12767 | 66760   |
| 1176  | 135  | 3816  | 51607   |
| 337   | 464  | 7677  | 10957   |
| 195   | 241  | 7725  | 15129   |
| 2980  | 1352 | 18127 | 70044   |
| 424   | 329  | 11533 | 55988   |
| 821   | 574  | 7539  | 20477   |
| 363   | 137  | 3200  | 26259   |
| 36    | 50   | 3921  | 9078    |
| 185   | 259  | 4429  | 6949    |
| 10864 | 4451 | 33843 | 76280   |
| 827   | 765  | 70411 | 900863  |
| 93    | 190  | 17623 | 27019   |
| 243   | 162  | 2597  | 7601    |
| 15    | 20   | 22749 | 47948   |
| 166   | 187  | 16009 | 48648   |
| 228   | 890  | 30673 | 20220   |
| 2827  | 1502 | 14635 | 27973   |
| 700   | 523  | 5946  | 11841   |
| 66    | 74   | 6266  | 15826   |
| 679   | 711  | 26484 | 71556   |
| 82    | 91   | 9889  | 31773   |
| 1044  | 1084 | 75395 | 777141  |
| 28    | 43   | 65965 | 98058   |
| 1199  | 609  | 5789  | 15012   |
| 101   | 214  | 3984  | 10893   |
| 125   | 177  | 8249  | 19874   |
| 280   | 273  | 15145 | 53424   |
| 222   | 517  | 44969 | 66082   |
| 462   | 1025 | 35604 | 47374   |
| 574   | 414  | 4491  | 9922    |
| 551   | 225  | 48764 | 1204782 |
| 1705  | 940  | 8971  | 24147   |
| 210   | 522  | 18757 | 21970   |
| 13874 | 3821 | 37960 | 115656  |
| 374   | 387  | 16512 | 42581   |
| 54    | 101  | 7665  | 13473   |
| 385   | 183  | 5909  | 35921   |
| 1969  | 1468 | 17091 | 41437   |
| 679   | 370  | 7346  | 34457   |
| 269   | 281  | 17372 | 27901   |
| 535   | 742  | 12334 | 17456   |
| 1384  | 225  | 6248  | 93917   |
| 5771  | 1283 | 12171 | 63428   |
| 465   | 102  | 3326  | 46885   |
| 18    | 43   | 17371 | 25616   |
| 2582  | 510  | 10489 | 128190  |

|      |      |       |        |
|------|------|-------|--------|
| 496  | 305  | 5790  | 20962  |
| 3680 | 1266 | 23347 | 167860 |
| 1737 | 949  | 17815 | 79301  |
| 1371 | 810  | 18360 | 81727  |
| 233  | 274  | 7359  | 16296  |
| 732  | 591  | 9545  | 26862  |
| 48   | 77   | 11525 | 24820  |
| 940  | 759  | 15794 | 48940  |

PS background subtracted.

| Pb207 | Pb208 | Th232 | U238   |
|-------|-------|-------|--------|
| 21    | 65    | 11649 | 18775  |
| 82    | 80    | 7918  | 11415  |
| 455   | 611   | 12087 | 20130  |
| 66    | 83    | 7760  | 16323  |
| 2322  | 1857  | 32282 | 27344  |
| 37    | 42    | 3298  | 9511   |
| 34    | 61    | 13259 | 22078  |
| 88    | 79    | 3583  | 12751  |
| 42    | 93    | 18399 | 33922  |
| 1046  | 169   | 3386  | 48524  |
| 370   | 592   | 54542 | 121109 |
| 31    | 41    | 10841 | 24888  |
| 209   | 224   | 11809 | 54082  |
| 280   | 468   | 23559 | 71100  |
| 401   | 603   | 30446 | 105917 |
| 172   | 159   | 8967  | 49467  |
| 100   | 227   | 21134 | 49966  |
| 56    | 146   | 19798 | 39856  |
| 790   | 734   | 7990  | 25808  |
| 96    | 125   | 11033 | 31241  |
| 90    | 119   | 12811 | 56596  |
| 123   | 120   | 6881  | 31140  |
| 251   | 603   | 13965 | 23742  |
| 354   | 515   | 29482 | 109277 |
| 12    | 22    | 6443  | 23350  |
| 22    | 51    | 5841  | 15075  |
| 790   | 828   | 38589 | 183805 |
| 57    | 128   | 15387 | 37879  |
| 43    | 116   | 15014 | 30567  |
| 457   | 243   | 5849  | 48616  |
| 208   | 182   | 11374 | 66929  |
| 402   | 425   | 17885 | 87243  |
| 495   | 541   | 31728 | 149342 |
| 38    | 61    | 4837  | 16771  |
| 118   | 633   | 16160 | 13801  |
| 144   | 194   | 21444 | 77353  |

|      |      |        |        |
|------|------|--------|--------|
| 9    | 34   | 10029  | 22153  |
| 26   | 49   | 6386   | 19213  |
| 1636 | 935  | 10114  | 59742  |
| 360  | 305  | 6581   | 32192  |
| 142  | 307  | 7064   | 15690  |
| 214  | 242  | 12617  | 56250  |
| 1334 | 5291 | 112045 | 119760 |
| 36   | 51   | 6311   | 24950  |
| 95   | 176  | 7005   | 19568  |
| 25   | 41   | 3801   | 14265  |
| 73   | 115  | 25908  | 86637  |
| 56   | 101  | 14085  | 41995  |
| 19   | 0    | 26     | 0      |
| 144  | 316  | 38738  | 97289  |
| 109  | 154  | 8992   | 38010  |
| 40   | 70   | 9258   | 34560  |
| 12   | 22   | 7704   | 27916  |
| 102  | 176  | 32426  | 102021 |
| 39   | 67   | 9099   | 22998  |
| 55   | 95   | 8164   | 27165  |
| 18   | 21   | 7389   | 39548  |
| 1159 | 1282 | 19099  | 65237  |
| 139  | 459  | 64984  | 98662  |
| 629  | 961  | 23401  | 65357  |
| 84   | 106  | 3710   | 12278  |
| 130  | 126  | 18573  | 104367 |
| 69   | 221  | 37729  | 67987  |
| 240  | 665  | 8372   | 9474   |
| 41   | 78   | 12700  | 41544  |
| 110  | 101  | 6832   | 32472  |
| 1599 | 1772 | 15086  | 32651  |

GLITTER!: Mean Raw CPS backgroi

| Pb208 | Th232  | U235 | U238    | Si29   | La139 | Hf177   |
|-------|--------|------|---------|--------|-------|---------|
| 51497 | 191623 | 2329 | 324210  | 879941 | 43    | 1402519 |
| 48860 | 294242 | 8112 | 1162770 | 945100 | 2     | 2014649 |
| 4011  | 1178   | 47   | 5344    | 0      | 5     | 12744   |
| 17996 | 257611 | 2673 | 383216  | 861102 | 3     | 1683242 |
| 43322 | 266609 | 5546 | 784159  | 847028 | 1     | 1606056 |
| 3164  | 145352 | 2492 | 340203  | 988376 | 83    | 1302545 |
| 29189 | 132687 | 1603 | 223192  | 871261 | 2572  | 1400365 |
| 3913  | 226410 | 3664 | 508477  | 922780 | 4     | 1355185 |
| 13635 | 60067  | 1601 | 229605  | 855164 | 1     | 1450355 |
| 10649 | 528999 | 9973 | 1428676 | 807027 | 10485 | 1381655 |
| 5459  | 400254 | 4994 | 702470  | 807723 | 0     | 1456384 |
| 2309  | 142155 | 2331 | 329216  | 814327 | 8     | 1247387 |
| 18448 | 143010 | 7299 | 1031010 | 851560 | 9     | 1766207 |



|        |         |       |         |         |       |         |
|--------|---------|-------|---------|---------|-------|---------|
| 18460  | 259682  | 4045  | 573433  | 804309  | 0     | 1361141 |
| 16811  | 116285  | 8641  | 1190342 | 838089  | 9     | 1598513 |
| 2042   | 117291  | 2062  | 289531  | 835754  | 6     | 1174891 |
| 55584  | 382710  | 11681 | 1684547 | 839163  | 21    | 1628444 |
| 6527   | 153128  | 3535  | 499229  | 840523  | 9     | 1493686 |
| 26676  | 392105  | 10700 | 1539064 | 821897  | 1     | 1473667 |
| 6161   | 547578  | 5875  | 843208  | 824714  | 5     | 1193275 |
| 7817   | 355233  | 8578  | 1229692 | 835486  | 40    | 1530729 |
| 25779  | 256597  | 4843  | 682956  | 857225  | 4     | 1500537 |
| 65301  | 565913  | 8209  | 1138755 | 888562  | 59    | 1040008 |
| 20146  | 672359  | 11572 | 1669501 | 829250  | 5     | 1155804 |
| 19354  | 124813  | 7530  | 1038799 | 887365  | 6     | 1733537 |
| 5367   | 170202  | 6079  | 854680  | 838562  | 0     | 1483164 |
| 59884  | 205626  | 60859 | 8733887 | 852103  | 31    | 2938371 |
| 543    | 54475   | 1032  | 145628  | 860231  | 33    | 1427525 |
| 3457   | 267407  | 9771  | 1402571 | 807078  | 1     | 1597951 |
| 4576   | 361343  | 6566  | 926833  | 793752  | 20    | 1403311 |
| 15392  | 1038789 | 19344 | 2803009 | 899906  | 53    | 1135302 |
| 7255   | 166967  | 3059  | 427636  | 817510  | 2122  | 1294037 |
| 59889  | 225459  | 3003  | 423726  | 844537  | 866   | 1437304 |
| 44891  | 359116  | 8821  | 1255777 | 889423  | 123   | 1544787 |
| 30925  | 1080329 | 23177 | 3305953 | 1023945 | 187   | 1655767 |
| 30166  | 155758  | 17597 | 2558943 | 943137  | 37    | 1959528 |
| 208705 | 138935  | 612   | 83165   | 1078824 | 4727  | 226     |
| 2993   | 199888  | 3485  | 484073  | 847783  | 1     | 1407838 |
| 20388  | 215032  | 8842  | 1274280 | 960301  | 0     | 1859010 |
| 13155  | 185292  | 2839  | 411961  | 946621  | 2     | 1476114 |
| 4001   | 269299  | 4815  | 667681  | 963647  | 10    | 1396864 |
| 5232   | 475101  | 10062 | 1441494 | 1017115 | 7     | 1665405 |
| 21704  | 162584  | 1681  | 240747  | 1025707 | 262   | 1669981 |
| 396489 | 2566128 | 49561 | 7111899 | 1058814 | 34    | 1470888 |
| 2319   | 146682  | 2841  | 387899  | 984309  | 2     | 1560211 |
| 364380 | 1034263 | 10169 | 1476911 | 959895  | 35    | 1648990 |
| 7769   | 48588   | 513   | 70961   | 929039  | 2     | 1676969 |
| 13625  | 181037  | 1899  | 262946  | 855234  | 186   | 1388173 |
| 4256   | 232487  | 4734  | 659555  | 981209  | 1     | 1479255 |
| 7782   | 157955  | 6982  | 1004733 | 925652  | 6     | 1545842 |
| 33146  | 209179  | 7255  | 1026788 | 911274  | 704   | 1562451 |
| 7904   | 110375  | 1335  | 185123  | 773439  | 2     | 1241972 |
| 1624   | 98361   | 1602  | 224752  | 818695  | 11    | 1130275 |
| 31731  | 397624  | 3674  | 512097  | 903315  | 17    | 1452518 |
| 103918 | 667148  | 11165 | 1602674 | 978561  | 11072 | 2139617 |
| 36319  | 5192    | 110   | 12437   | 4301    | 3237  | 0       |
| 30501  | 117970  | 4337  | 617617  | 828141  | 1     | 1476942 |
| 13744  | 426886  | 20288 | 2924880 | 990033  | 9     | 1848995 |
| 2033   | 102522  | 2726  | 382128  | 959189  | 26    | 1397634 |
| 12603  | 99050   | 3074  | 437572  | 890519  | 14    | 1279179 |
| 9900   | 236065  | 4127  | 579467  | 830528  | 25    | 1326247 |
| 2702   | 123343  | 3865  | 538231  | 1037089 | 9     | 1865572 |
| 2583   | 166870  | 3021  | 433684  | 968828  | 2     | 1564824 |
| 6713   | 588695  | 6480  | 905552  | 966931  | 15    | 1064721 |

|        |         |       |         |         |      |         |
|--------|---------|-------|---------|---------|------|---------|
| 35228  | 1010402 | 28592 | 4122979 | 980310  | 1119 | 1632672 |
| 78866  | 2711214 | 25710 | 3656389 | 1094517 | 31   | 1765144 |
| 18159  | 469918  | 10315 | 1459427 | 1006797 | 942  | 1722246 |
| 13918  | 301108  | 4544  | 653912  | 863420  | 112  | 1143253 |
| 2272   | 134175  | 3466  | 481670  | 808408  | 48   | 1398455 |
| 9596   | 589740  | 7195  | 1007763 | 881738  | 9    | 1340712 |
| 100862 | 391675  | 9627  | 1400353 | 894039  | 108  | 1776704 |
| 9731   | 288308  | 6905  | 963171  | 798842  | 4    | 1416308 |
| 89896  | 329379  | 3888  | 550566  | 873464  | 2    | 1632967 |
| 10942  | 304476  | 8612  | 1228892 | 874142  | 18   | 1447199 |
| 1973   | 113000  | 2160  | 303674  | 832924  | 0    | 1304616 |
| 6979   | 173709  | 6373  | 896734  | 876105  | 41   | 1399241 |
| 35441  | 1386217 | 9702  | 1372495 | 912545  | 4381 | 1046787 |
| 34595  | 140320  | 3938  | 560751  | 959950  | 2    | 1613190 |
| 24105  | 104471  | 5210  | 750715  | 763493  | 0    | 1565245 |
| 2479   | 176596  | 2546  | 360807  | 757505  | 18   | 1137820 |
| 30637  | 308078  | 3111  | 430392  | 852520  | 760  | 1175921 |
| 2236   | 19404   | 306   | 41357   | 801794  | 2    | 1152953 |
| 12358  | 130991  | 7072  | 991869  | 844643  | 1    | 1751501 |
| 2534   | 154330  | 2633  | 371393  | 844771  | 4    | 1442121 |
| 49096  | 429766  | 3173  | 450356  | 890334  | 31   | 1486926 |
| 65222  | 3357221 | 24195 | 3439881 | 1005227 | 160  | 1127010 |
| 24225  | 159439  | 2001  | 277309  | 891733  | 3    | 1555242 |

GLITTER!: Mean Raw CPS backgroi

| Pb208  | Th232   | U235  | U238    | Si29    | La139   | Hf177   |
|--------|---------|-------|---------|---------|---------|---------|
| 82245  | 1193915 | 15118 | 2172576 | 902105  | 855     | 1887220 |
| 125909 | 2302228 | 11151 | 1585971 | 2987181 | 11866   | 4361970 |
| 12498  | 1035911 | 15016 | 2144613 | 2888795 | 24      | 5373694 |
| 39282  | 368797  | 3820  | 533243  | 940299  | 601     | 1719165 |
| 20126  | 403344  | 3898  | 543401  | 948051  | 17      | 1672249 |
| 56958  | 376666  | 3689  | 522887  | 995400  | 12      | 1770080 |
| 8018   | 1356156 | 29448 | 4211711 | 983080  | 338     | 2048789 |
| 2079   | 149742  | 3213  | 449375  | 964671  | 1       | 1733197 |
| 7599   | 833187  | 11973 | 1706666 | 1002616 | 61      | 1778894 |
| 12740  | 330145  | 22640 | 3209409 | 983857  | 3       | 2392263 |
| 8894   | 458225  | 8190  | 1173962 | 1028047 | 32      | 1947752 |
| 17772  | 199216  | 2271  | 313387  | 1030032 | 588     | 1903396 |
| 7514   | 716545  | 9231  | 1304713 | 1150568 | 1720    | 2604609 |
| 121376 | 2661869 | 26032 | 3723828 | 790824  | 1355709 | 1527931 |
| 55393  | 310497  | 932   | 128112  | 837808  | 27890   | 3113    |
| 1426   | 110141  | 3190  | 444196  | 992059  | 7       | 1645158 |
| 11800  | 177584  | 12069 | 1727436 | 1030927 | 6       | 2317848 |
| 7869   | 104086  | 2796  | 390699  | 954403  | 0       | 1972277 |
| 3871   | 198577  | 3412  | 476196  | 925178  | 0       | 1902804 |
| 1026   | 98226   | 1915  | 267520  | 959257  | 59      | 1718737 |

|       |         |       |         |         |       |         |
|-------|---------|-------|---------|---------|-------|---------|
| 3913  | 212907  | 4967  | 686896  | 846286  | 22    | 1697245 |
| 3160  | 87902   | 6937  | 964132  | 906600  | 5     | 2104731 |
| 14153 | 1138061 | 10840 | 1544659 | 987287  | 72    | 1655122 |
| 12104 | 406826  | 13547 | 1936240 | 909439  | 126   | 1832046 |
| 16091 | 157679  | 1921  | 272122  | 908047  | 31    | 1736371 |
| 3825  | 217880  | 3661  | 520308  | 954288  | 23    | 1403987 |
| 1978  | 113858  | 9783  | 1363276 | 935734  | 2     | 2327354 |
| 4216  | 141559  | 3207  | 451644  | 976350  | 93    | 1050717 |
| 8114  | 906992  | 6583  | 908921  | 968410  | 319   | 1568143 |
| 27519 | 639838  | 11597 | 1643244 | 1039124 | 1     | 1880965 |
| 7779  | 475428  | 16114 | 2309646 | 976952  | 0     | 2363282 |
| 7752  | 363891  | 9632  | 1353737 | 987245  | 2     | 2135156 |
| 22213 | 565877  | 5400  | 754814  | 1075491 | 969   | 2097719 |
| 15608 | 197333  | 4207  | 593898  | 996446  | 3     | 1868835 |
| 67845 | 78798   | 226   | 31239   | 693850  | 47025 | 738     |
| 2879  | 1059156 | 33997 | 4866976 | 983286  | 7     | 2568879 |
| 13406 | 196182  | 15710 | 2206676 | 1026234 | 34    | 2555491 |
| 47771 | 666046  | 8896  | 1269154 | 1025420 | 3837  | 2173468 |
| 16982 | 1031720 | 21130 | 3006459 | 984554  | 4784  | 2069453 |
| 1235  | 69807   | 1510  | 204349  | 927842  | 0     | 933651  |
| 3190  | 440532  | 7129  | 993781  | 913888  | 25    | 1460508 |
| 7296  | 999430  | 16448 | 2337319 | 950838  | 725   | 1910391 |
| 55946 | 645742  | 13201 | 1865917 | 930032  | 172   | 2005124 |
| 3427  | 359659  | 6091  | 837708  | 981795  | 51    | 1731795 |
| 654   | 208339  | 2570  | 352372  | 902856  | 2303  | 1777059 |
| 2439  | 129109  | 2778  | 388318  | 914763  | 0     | 1854769 |
| 33173 | 236942  | 6636  | 911399  | 907558  | 15868 | 1801129 |
| 4861  | 762811  | 7092  | 1001764 | 953591  | 41    | 1725345 |
| 9521  | 79524   | 2502  | 343119  | 921117  | 4361  | 1337770 |
| 34391 | 733863  | 9665  | 1375121 | 941160  | 18    | 1811950 |
| 20125 | 468612  | 16293 | 2328437 | 996289  | 4     | 2171207 |
| 18526 | 214834  | 1055  | 151633  | 980179  | 82731 | 1930633 |
| 8205  | 140485  | 6067  | 833817  | 911101  | 4     | 1931831 |
| 51707 | 426803  | 6160  | 858004  | 1031449 | 27    | 2095746 |
| 14762 | 758666  | 15962 | 2253810 | 918616  | 28257 | 1674794 |
| 1518  | 163408  | 2531  | 357516  | 883960  | 14    | 1256925 |
| 15101 | 206624  | 4297  | 595702  | 944809  | 44    | 1671645 |
| 13307 | 1557686 | 25413 | 3589424 | 895167  | 37    | 1610076 |
| 10083 | 472132  | 10265 | 1444808 | 1038684 | 5256  | 1581016 |
| 13746 | 506926  | 6048  | 861105  | 955115  | 54    | 1707178 |
| 11662 | 675892  | 14098 | 2044769 | 994952  | 57    | 1989510 |
| 15243 | 221848  | 4783  | 666058  | 1008217 | 552   | 1773113 |
| 28232 | 678756  | 3974  | 546227  | 961204  | 55    | 1839189 |
| 9545  | 299601  | 6227  | 877621  | 1004046 | 13    | 2014080 |
| 727   | 78770   | 1244  | 174937  | 928365  | 2     | 1409992 |
| 7513  | 100993  | 1644  | 229577  | 996845  | 13    | 1686755 |
| 48586 | 34126   | 187   | 25870   | 85869   | 6808  | 6967    |
| 5019  | 68835   | 553   | 78381   | 866549  | 65    | 1008350 |
| 745   | 73313   | 1313  | 178629  | 926649  | 6     | 1078088 |
| 5246  | 344057  | 9642  | 1370932 | 830146  | 979   | 1615014 |
| 53637 | 679771  | 15719 | 2252354 | 890194  | 5     | 2095401 |

|        |         |       |         |         |     |         |
|--------|---------|-------|---------|---------|-----|---------|
| 17011  | 374670  | 1768  | 252660  | 949780  | 12  | 1705642 |
| 101149 | 1158573 | 5154  | 731274  | 880577  | 69  | 1361739 |
| 8125   | 814533  | 6648  | 912986  | 886273  | 33  | 1326123 |
| 33603  | 176816  | 3358  | 460321  | 821892  | 3   | 1496654 |
| 6121   | 2303686 | 33360 | 4736784 | 851476  | 143 | 1697118 |
| 20223  | 174188  | 5143  | 709239  | 904813  | 12  | 2003819 |
| 36690  | 188877  | 2550  | 357319  | 952730  | 14  | 1655345 |
| 39038  | 502727  | 27025 | 3830054 | 1078908 | 2   | 1999646 |
| 1463   | 156480  | 2831  | 382630  | 1069874 | 3   | 1775374 |
| 19432  | 360490  | 10609 | 1512527 | 1071994 | 8   | 2187324 |
| 11394  | 535619  | 6898  | 976865  | 1128399 | 7   | 2066668 |
| 25024  | 345897  | 6320  | 884108  | 1025157 | 3   | 2027923 |
| 14325  | 338027  | 6917  | 959846  | 990048  | 2   | 1701909 |
| 8614   | 99580   | 1032  | 139203  | 795135  | 0   | 1529231 |

GLITTER!: Mean Raw CPS backgroi

| Pb208 | Th232  | U235 | U238    | Si29    | La139 | Hf177   |
|-------|--------|------|---------|---------|-------|---------|
| 568   | 28024  | 552  | 81829   | 969776  | 265   | 1561517 |
| 6533  | 270639 | 4456 | 910851  | 1048044 | 69    | 1705848 |
| 2291  | 73232  | 2957 | 621336  | 1049757 | 4     | 2252348 |
| 23272 | 64425  | 1255 | 179248  | 1051398 | 3     | 1446894 |
| 889   | 24311  | 620  | 88294   | 1009522 | 1     | 1412145 |
| 2224  | 93709  | 2266 | 457225  | 1052764 | 410   | 1773771 |
| 1207  | 32912  | 501  | 70553   | 1014290 | 5     | 1434445 |
| 1717  | 56527  | 1598 | 227047  | 991008  | 1     | 1818900 |
| 16612 | 107712 | 1015 | 138876  | 992534  | 418   | 1595067 |
| 8853  | 58190  | 801  | 115369  | 1014641 | 177   | 1723344 |
| 4491  | 925314 | 6493 | 1345239 | 1027845 | 3374  | 1058460 |
| 2853  | 99356  | 2359 | 485516  | 1021521 | 1     | 1635747 |
| 2031  | 34326  | 438  | 62553   | 801236  | 44    | 1264500 |
| 4112  | 26010  | 429  | 59979   | 1036902 | 5     | 1720654 |
| 569   | 11830  | 3278 | 687270  | 1027763 | 10    | 1989465 |
| 767   | 68029  | 900  | 124318  | 889640  | 25    | 996457  |
| 5037  | 35084  | 848  | 120821  | 1081821 | 0     | 1680631 |
| 11914 | 87907  | 1907 | 302530  | 1091736 | 20    | 1971767 |
| 8200  | 139132 | 1590 | 228722  | 1095381 | 408   | 1434355 |
| 6387  | 40794  | 545  | 76945   | 1053651 | 1     | 1661044 |
| 4144  | 142331 | 8413 | 1753701 | 1057770 | 2     | 1844201 |
| 5165  | 23547  | 723  | 102211  | 1070607 | 22    | 1648347 |
| 953   | 67652  | 2911 | 596109  | 1165232 | 10    | 1768987 |
| 11704 | 125461 | 1608 | 223444  | 1145294 | 158   | 1806842 |
| 6141  | 113946 | 1774 | 254042  | 1095990 | 6     | 1623230 |
| 1278  | 36134  | 1014 | 142392  | 1088180 | 54    | 1748256 |
| 18583 | 85350  | 1897 | 313732  | 1177775 | 589   | 1540198 |
| 10153 | 47478  | 1417 | 196221  | 1136829 | 2     | 2110256 |
| 5512  | 163695 | 4953 | 1012833 | 1274258 | 752   | 2219496 |
| 5534  | 17567  | 469  | 65786   | 1065833 | 13    | 1455276 |

|       |        |      |         |         |       |         |
|-------|--------|------|---------|---------|-------|---------|
| 4340  | 511523 | 2925 | 607418  | 1283649 | 4176  | 1743965 |
| 2538  | 78469  | 2553 | 527095  | 1113156 | 250   | 1930730 |
| 4573  | 61693  | 1092 | 148169  | 1044959 | 3     | 1496315 |
| 6159  | 43538  | 890  | 122238  | 1096165 | 1     | 1542908 |
| 4152  | 57089  | 925  | 128998  | 1023438 | 23    | 1360502 |
| 35896 | 149732 | 6712 | 1375761 | 1167922 | 62    | 2002663 |
| 879   | 52422  | 945  | 133449  | 959255  | 1     | 1377639 |
| 962   | 67206  | 1112 | 161883  | 1023506 | 1313  | 1585381 |
| 4164  | 26109  | 401  | 54763   | 928961  | 1     | 1440821 |
| 1234  | 43213  | 1234 | 172193  | 1015646 | 2     | 1382825 |
| 8975  | 43425  | 816  | 116916  | 992395  | 812   | 1450114 |
| 689   | 6260   | 1156 | 163443  | 1037131 | 0     | 2047441 |
| 4278  | 115568 | 3015 | 628246  | 1082417 | 153   | 1680337 |
| 4859  | 29981  | 997  | 139618  | 1110810 | 1807  | 1682608 |
| 13628 | 60351  | 1706 | 233711  | 990095  | 0     | 1624868 |
| 654   | 31342  | 885  | 127404  | 891218  | 0     | 1172451 |
| 5796  | 248925 | 8004 | 1649650 | 1100311 | 349   | 1745664 |
| 2505  | 183990 | 7818 | 1616277 | 1104398 | 0     | 1855982 |
| 2793  | 57485  | 2447 | 502714  | 1305290 | 4     | 1870376 |
| 438   | 75747  | 1528 | 215168  | 1136539 | 0     | 1775446 |
| 2902  | 87073  | 3375 | 681492  | 1202802 | 8     | 2011218 |
| 11284 | 442983 | 5171 | 1069996 | 1203844 | 40    | 1520250 |
| 1311  | 17703  | 304  | 42766   | 1160043 | 5     | 1723904 |
| 1780  | 36486  | 1152 | 156532  | 1170756 | 34517 | 1383706 |
| 475   | 33317  | 605  | 84359   | 1111149 | 552   | 1600042 |
| 3023  | 20748  | 377  | 53558   | 1184561 | 1     | 1750192 |
| 7040  | 52922  | 2524 | 516239  | 1314025 | 8     | 1886551 |
| 673   | 48287  | 1099 | 154505  | 1057245 | 1     | 1542889 |
| 60511 | 734812 | 4909 | 1011928 | 1258887 | 7     | 2375271 |
| 10876 | 121461 | 1356 | 191813  | 1209869 | 9     | 1739862 |
| 7019  | 178758 | 4379 | 891206  | 1252412 | 2543  | 1810366 |
| 9874  | 76605  | 2560 | 510272  | 1273681 | 8     | 2392227 |
| 28871 | 641417 | 2044 | 390650  | 1330725 | 203   | 1760600 |
| 17282 | 87873  | 1651 | 225691  | 1196581 | 5     | 1684819 |
| 7430  | 35675  | 738  | 103663  | 1120335 | 2     | 1693857 |
| 10815 | 54526  | 2702 | 555153  | 1199598 | 5     | 2216664 |
| 2047  | 77747  | 3947 | 796402  | 1176617 | 312   | 2112653 |
| 714   | 79071  | 1449 | 201672  | 1146724 | 75    | 1574210 |
| 4481  | 19892  | 1072 | 147420  | 1080609 | 153   | 1852588 |
| 2869  | 35663  | 669  | 94215   | 1059938 | 606   | 1637467 |
| 368   | 25978  | 527  | 73053   | 1084945 | 1     | 1515733 |
| 3626  | 38601  | 1063 | 150661  | 1217062 | 13    | 2088441 |
| 3628  | 96405  | 2883 | 585173  | 1227509 | 2483  | 1912406 |
| 3712  | 151813 | 5588 | 1156243 | 1202499 | 1     | 2158804 |
| 3555  | 26500  | 458  | 64374   | 1203039 | 731   | 1757915 |
| 975   | 65192  | 2320 | 471774  | 1220437 | 6     | 1731086 |
| 6568  | 64295  | 1449 | 199771  | 1244728 | 27    | 1497183 |
| 10750 | 110939 | 4460 | 916461  | 1266846 | 250   | 2371264 |
| 4511  | 90645  | 1824 | 259818  | 1170681 | 3     | 1913077 |
| 3252  | 60944  | 1073 | 150263  | 1147782 | 78    | 1715455 |
| 1046  | 65851  | 1541 | 215555  | 1184046 | 13    | 1569199 |

|       |        |      |         |         |      |         |
|-------|--------|------|---------|---------|------|---------|
| 2797  | 54584  | 1807 | 286573  | 1331956 | 0    | 2292354 |
| 20559 | 73064  | 960  | 134623  | 1198967 | 92   | 1350342 |
| 4491  | 136775 | 3319 | 685821  | 1286589 | 326  | 1902412 |
| 390   | 24485  | 417  | 60151   | 1224708 | 33   | 1428067 |
| 3324  | 108915 | 2701 | 554215  | 1252206 | 3    | 1553109 |
| 3836  | 147834 | 2936 | 597320  | 1194386 | 2    | 1330400 |
| 404   | 23620  | 551  | 76317   | 1169416 | 0    | 1873471 |
| 11597 | 75166  | 1557 | 227985  | 1235407 | 1    | 2018660 |
| 3598  | 51853  | 3334 | 678472  | 1221334 | 1    | 1767024 |
| 2108  | 61588  | 975  | 128203  | 1174912 | 91   | 1574792 |
| 7445  | 21465  | 3165 | 653384  | 1084206 | 14   | 2140794 |
| 2162  | 107236 | 3727 | 771373  | 1153295 | 1860 | 1951909 |
| 11221 | 61235  | 1694 | 240496  | 1304988 | 2    | 2264670 |
| 2811  | 42640  | 582  | 79571   | 1115520 | 11   | 1537629 |
| 496   | 33234  | 716  | 104010  | 1114686 | 2    | 1717676 |
| 3276  | 115996 | 2603 | 550416  | 1214606 | 2813 | 2008810 |
| 6596  | 101592 | 1330 | 185429  | 1118899 | 5    | 1936923 |
| 3356  | 566195 | 3082 | 625688  | 1177949 | 154  | 1507953 |
| 2990  | 121754 | 4511 | 917850  | 1146809 | 6    | 2049669 |
| 6927  | 167875 | 1118 | 160623  | 1136032 | 40   | 1207575 |
| 4018  | 205393 | 3401 | 703755  | 1182747 | 1495 | 1908235 |
| 216   | 26948  | 475  | 67454   | 1252948 | 38   | 1813521 |
| 2503  | 35280  | 634  | 89602   | 1163221 | 29   | 1578462 |
| 9487  | 75590  | 1149 | 161860  | 1273576 | 11   | 1961212 |
| 1354  | 40674  | 4311 | 856994  | 927762  | 3    | 1751387 |
| 678   | 65453  | 869  | 121635  | 1146897 | 553  | 1318158 |
| 3699  | 142988 | 2779 | 563664  | 1284378 | 4566 | 1788342 |
| 5387  | 49723  | 2768 | 565456  | 1349111 | 2    | 2185184 |
| 17410 | 124556 | 2907 | 592730  | 1335181 | 1    | 2316217 |
| 12990 | 43944  | 1345 | 188555  | 1266648 | 2    | 2120476 |
| 17641 | 160703 | 5070 | 1054057 | 1374358 | 18   | 2210049 |
| 2791  | 103651 | 2921 | 595691  | 1267863 | 39   | 1823066 |
| 1439  | 102278 | 1611 | 238348  | 1248684 | 123  | 1769391 |
| 345   | 55950  | 500  | 73448   | 1304182 | 25   | 1215648 |
| 7970  | 123164 | 1132 | 158763  | 1308887 | 55   | 1914651 |
| 9199  | 510509 | 4949 | 1014960 | 1292447 | 10   | 1938195 |
| 2327  | 189013 | 3097 | 640819  | 1255729 | 12   | 1733698 |
| 8941  | 79677  | 2047 | 398749  | 1507333 | 2    | 2581725 |
| 27554 | 101477 | 3530 | 732486  | 1263127 | 0    | 2191607 |

and subtracted.

| Pb206  | Pb207  | Pb208  | Th232   | U235  | U238    | U tot, ppm | Pb rad, ppn |
|--------|--------|--------|---------|-------|---------|------------|-------------|
| 47790  | 4067   | 26195  | 277742  | 1974  | 272171  | 77.65828   | 51.7817     |
| 81158  | 5183   | 6757   | 135804  | 6086  | 845845  | 244.786    | 89.30487    |
| 339199 | 39310  | 61904  | 401850  | 7778  | 1081821 | 301.8581   | 360.3602    |
| 84045  | 4696   | 19055  | 768941  | 12074 | 1737531 | 497.2612   | 91.70967    |
| 74328  | 6743   | 21870  | 225777  | 2577  | 360237  | 107.9685   | 85.04843    |
| 130356 | 9650   | 16970  | 248410  | 6561  | 917931  | 270.569    | 146.8901    |
| 3556   | 2877   | 7198   | 45952   | 437   | 64291   | 29.88869   | 6.329278    |
| 2542   | 1962   | 5194   | 104525  | 324   | 43292   | 15.02029   | 3.381475    |
| 8017   | 487    | 2001   | 278348  | 4597  | 640711  | 186.1891   | 8.940194    |
| 87680  | 6126   | 16029  | 269140  | 5332  | 736195  | 223.5036   | 102.3088    |
| 5285   | 290    | 1604   | 237419  | 2904  | 411507  | 121.5814   | 6.009902    |
| 37303  | 1855   | 4230   | 583373  | 20729 | 2909419 | 847.3937   | 41.85762    |
| 150668 | 9763   | 12395  | 251299  | 10867 | 1551396 | 446.2887   | 167.2529    |
| 269971 | 29154  | 43936  | 317319  | 6725  | 938785  | 269.938    | 299.9671    |
| 4851   | 251    | 1501   | 320840  | 4111  | 568246  | 161.7014   | 5.340151    |
| 10937  | 659    | 2802   | 516421  | 9355  | 1346529 | 364.3265   | 11.46499    |
| 147275 | 8869   | 9516   | 219219  | 12679 | 1802423 | 503.1055   | 159.4964    |
| 69466  | 5146   | 11813  | 157956  | 3371  | 468078  | 136.9916   | 78.98798    |
| 147489 | 11741  | 38074  | 424643  | 5925  | 840704  | 241.7708   | 165.0143    |
| 5276   | 283    | 1263   | 189699  | 3060  | 428719  | 132.1368   | 6.335433    |
| 11142  | 603    | 2170   | 317484  | 6512  | 908141  | 262.8516   | 12.64916    |
| 5714   | 4425   | 11148  | 29568   | 670   | 94782   | 35.75628   | 8.468187    |
| 14996  | 948    | 4795   | 428100  | 5321  | 755042  | 227.3878   | 17.76856    |
| 28396  | 1478   | 5115   | 728568  | 16133 | 2269872 | 676.2694   | 33.33308    |
| 5867   | 1306   | 4554   | 272831  | 2757  | 379430  | 110.1436   | 6.718019    |
| 165358 | 14889  | 14299  | 132939  | 5505  | 773053  | 235.0496   | 198.5827    |
| 74284  | 4554   | 10620  | 241053  | 6311  | 878807  | 238.3559   | 79.68571    |
| 40067  | 2473   | 19092  | 432271  | 3308  | 464046  | 138.9754   | 47.52775    |
| 27608  | 1597   | 7331   | 1046920 | 14767 | 2166957 | 598.1007   | 30.22035    |
| 148185 | 11852  | 36341  | 428733  | 5979  | 824697  | 242.2049   | 172.8469    |
| 338120 | 38407  | 78347  | 614887  | 9927  | 1408709 | 433.6679   | 413.9823    |
| 51120  | 3003   | 5886   | 157531  | 5329  | 741188  | 205.7152   | 56.5099     |
| 123491 | 9882   | 16471  | 182077  | 4990  | 693014  | 184.3066   | 131.17      |
| 44912  | 2718   | 21504  | 539176  | 4181  | 581863  | 162.3607   | 50.12309    |
| 26793  | 1469   | 7706   | 356817  | 4795  | 662426  | 183.8375   | 29.77744    |
| 893288 | 157081 | 145561 | 1027844 | 22938 | 3265453 | 898.8933   | 986.2405    |
| 28043  | 1858   | 6591   | 133727  | 2275  | 319935  | 86.41785   | 30.4246     |
| 10458  | 8441   | 21942  | 254713  | 625   | 85400   | 25.09798   | 12.36183    |
| 49524  | 3070   | 12502  | 287015  | 4241  | 587053  | 174.5115   | 59.29804    |

|        |       |       |         |       |         |          |          |
|--------|-------|-------|---------|-------|---------|----------|----------|
| 7423   | 441   | 3288  | 638177  | 5687  | 799493  | 229.6027 | 8.597374 |
| 299380 | 22819 | 34170 | 420079  | 13174 | 1858485 | 484.0098 | 314.9286 |
| 32007  | 2603  | 11876 | 134787  | 1269  | 177242  | 55.94637 | 40.86515 |
| 290574 | 21855 | 43461 | 616105  | 13736 | 1926982 | 575.4521 | 351.4755 |
| 29849  | 1810  | 4565  | 108873  | 2594  | 361261  | 104.0826 | 34.88457 |
| 27887  | 1396  | 8265  | 1349017 | 16901 | 2369719 | 722.6774 | 34.5473  |
| 1046   | 0     | 387   | 0       | 2     | 12      | #DIV/0!  | #DIV/0!  |
| 51092  | 3276  | 7343  | 55978   | 1676  | 239272  | #DIV/0!  | #DIV/0!  |
| 162883 | 26452 | 36234 | 106800  | 1904  | 268298  | 111.6236 | 180.8202 |
| 78289  | 5047  | 18600 | 199113  | 3993  | 562301  | 226.1202 | 84.0621  |
| 5769   | 350   | 1889  | 182787  | 2924  | 406961  | 160.5844 | 6.081149 |
| 28559  | 1908  | 5753  | 70899   | 1741  | 244848  | 90.90709 | 28.35362 |
| 16018  | 918   | 3253  | 60290   | 1435  | 204631  | 87.22857 | 18.27119 |
| 4480   | 444   | 1360  | 66637   | 1590  | 228572  | 96.33595 | 5.058337 |
| 92504  | 5714  | 12378 | 158971  | 5626  | 788064  | 309.2837 | 97.28475 |
| 5742   | 1253  | 3167  | 20500   | 635   | 86604   | 34.56833 | 6.146856 |
| 7091   | 5437  | 13774 | 17887   | 883   | 118419  | 42.38454 | 6.811368 |
| 52870  | 3422  | 7073  | 74506   | 2651  | 368393  | 123.08   | 47.44024 |
| 10026  | 550   | 2545  | 195741  | 3875  | 543842  | 169.3841 | 8.390809 |
| 8997   | 516   | 2226  | 170849  | 3240  | 448807  | 155.0287 | 8.359397 |
| 5423   | 689   | 2507  | 77519   | 1193  | 166077  | 54.76751 | 4.814122 |
| 23289  | 1444  | 6017  | 363423  | 7347  | 1033844 | 355.8997 | 21.59424 |
| 121877 | 6970  | 31194 | 665579  | 12590 | 1799148 | 576.8681 | 105.3309 |
| 7327   | 433   | 2011  | 152300  | 2636  | 380524  | 142.6647 | 7.410223 |
| 21150  | 1745  | 10876 | 76445   | 616   | 89228   | 33.93816 | 21.714   |
| 37914  | 3035  | 4348  | 31910   | 1340  | 186652  | 72.41099 | 39.73134 |
| 59531  | 3359  | 10532 | 288347  | 7984  | 1138558 | 376.3865 | 53.23375 |
| 268168 | 34615 | 45318 | 158680  | 4179  | 593984  | 186.0056 | 227.3294 |
| 21883  | 1188  | 4641  | 365591  | 8552  | 1236527 | 378.31   | 18.13846 |
| 72262  | 5778  | 14991 | 90656   | 2003  | 272946  | 84.09359 | 60.3574  |
| 341582 | 21074 | 10804 | 131092  | 20812 | 2989112 | 890.5168 | 276.0804 |
| 29687  | 1753  | 11185 | 904961  | 11718 | 1675886 | 550.5214 | 26.47318 |
| 113547 | 6891  | 12811 | 183301  | 7479  | 1089327 | 312.3814 | 88.46194 |
| 690389 | 52130 | 57065 | 405286  | 22305 | 3228981 | 933.9513 | 542.9319 |
| 25271  | 3024  | 9894  | 403726  | 8370  | 1169565 | 354.2604 | 20.83089 |
| 7911   | 6130  | 15112 | 7222    | 210   | 31900   | 15.12443 | 10.21369 |
| 117885 | 6693  | 8233  | 193340  | 14533 | 2065151 | 649.0995 | 100.9621 |
| 16613  | 994   | 4478  | 141029  | 2584  | 365350  | 124.0604 | 15.38374 |
| 7236   | 423   | 2458  | 184912  | 2597  | 370711  | 128.5496 | 6.845238 |
| 7971   | 511   | 1534  | 139944  | 4094  | 564955  | 200.2789 | 7.718886 |

and subtracted.

| Pb206 | Pb207 | Pb208 | Th232 | U235 | U238   | U tot, ppm | Pb rad, ppn |
|-------|-------|-------|-------|------|--------|------------|-------------|
| 34917 | 91710 | 76350 | 13365 | 165  | 16074  | 0.190494   | 1.468522    |
| 1787  | 313   | 233   | 5798  | 232  | 31991  | 8.436979   | 1.679234    |
| 3138  | 509   | 652   | 41120 | 903  | 127319 | 36.1532    | 3.185574    |



|         |        |       |         |      |         |          |          |
|---------|--------|-------|---------|------|---------|----------|----------|
| 65071   | 22369  | 18607 | 69637   | 983  | 138936  | 31.33585 | 52.64707 |
| 14207   | 2208   | 3611  | 112151  | 1944 | 337434  | 80.82324 | 12.25131 |
| 1298    | 203    | 408   | 37216   | 569  | 80875   | 20.44758 | 1.18571  |
| 2679    | 412    | 666   | 98082   | 1792 | 324356  | 75.41022 | 2.25843  |
| 1020728 | 441004 | 8504  | 54175   | 6949 | 1463506 | 302.7606 | 768.19   |
| 40104   | 6938   | 16719 | 228832  | 2487 | 513505  | 109.0008 | 31.07558 |
| 13691   | 2167   | 858   | 29763   | 2173 | 429059  | 94.01952 | 10.99041 |
| 43866   | 7874   | 5287  | 66203   | 2385 | 487349  | 101.8019 | 33.68103 |
| 6896    | 1046   | 1773  | 322989  | 4837 | 1014233 | 280.57   | 7.033645 |
| 9587    | 1595   | 7428  | 2100634 | 7814 | 1599691 | 348.9329 | 7.735749 |
| 2616    | 410    | 1106  | 114873  | 1249 | 177815  | 42.73721 | 2.334681 |
| 1135    | 203    | 231   | 33291   | 724  | 100823  | 25.61194 | 1.074945 |
| 1472    | 323    | 413   | 55242   | 996  | 141675  | 34.38576 | 1.334977 |
| 3279    | 532    | 1259  | 200003  | 2271 | 448287  | 105.7298 | 2.901029 |
| 5860    | 947    | 1907  | 66237   | 873  | 122625  | 28.89753 | 5.195707 |
| 3910    | 1109   | 2253  | 14081   | 100  | 15778   | 3.957047 | 3.70187  |
| 24807   | 5033   | 3677  | 42825   | 1468 | 226204  | 62.14411 | 25.9745  |
| 3206    | 578    | 855   | 114143  | 2174 | 425860  | 105.7499 | 3.043667 |
| 1071    | 223    | 302   | 46190   | 893  | 124152  | 31.40286 | 1.039293 |
| 1356    | 275    | 348   | 51953   | 1004 | 143692  | 35.35971 | 1.284021 |
| 1207    | 243    | 289   | 46748   | 1033 | 148740  | 35.52106 | 1.112788 |
| 3740    | 563    | 984   | 93786   | 1535 | 214865  | 51.89078 | 3.497084 |
| 1206    | 289    | 342   | 40985   | 854  | 114889  | 25.25183 | 1.029473 |
| 71037   | 20336  | 22198 | 111276  | 1550 | 239123  | 52.84958 | 61.14315 |
| 5050    | 734    | 1197  | 88958   | 1637 | 228157  | 54.52674 | 4.713911 |
| 15144   | 2391   | 4147  | 143311  | 2217 | 435277  | 98.4915  | 13.42506 |
| 51349   | 24573  | 6430  | 39081   | 1519 | 209573  | 48.56501 | 46.75373 |
| 2030    | 417    | 498   | 13357   | 272  | 39629   | 9.79056  | 1.976335 |
| 3399    | 557    | 760   | 25034   | 492  | 67012   | 15.66186 | 3.139372 |
| 21421   | 3864   | 1441  | 15392   | 3935 | 808390  | 192.7879 | 20.24553 |
| 680     | 159    | 184   | 27664   | 523  | 75026   | 17.67358 | 0.636783 |
| 9427    | 2128   | 1430  | 36053   | 1560 | 242918  | 55.87822 | 8.643976 |
| 39146   | 6131   | 10879 | 578565  | 6574 | 1378209 | 303.4582 | 34.4534  |
| 25127   | 4351   | 6869  | 114100  | 1718 | 242507  | 59.66871 | 24.7774  |
| 677     | 136    | 121   | 23677   | 607  | 88317   | 22.1117  | 0.68176  |
| 98146   | 50617  | 20511 | 106340  | 1195 | 166377  | 38.69634 | 91.98279 |
| 6042    | 982    | 1565  | 191778  | 3472 | 721792  | 155.1235 | 5.276496 |
| 10327   | 1922   | 1269  | 44823   | 2088 | 392075  | 92.1384  | 9.881116 |
| 803     | 177    | 278   | 47112   | 723  | 98626   | 22.84751 | 0.760189 |
| 1299    | 255    | 319   | 57694   | 1138 | 158587  | 36.33339 | 1.219172 |
| 6914    | 1109   | 2060  | 71651   | 990  | 142355  | 35.11368 | 6.997457 |
| 27216   | 4724   | 7625  | 147348  | 2204 | 434144  | 101.3772 | 26.13846 |
| 3996    | 680    | 952   | 32153   | 597  | 83196   | 17.80403 | 3.525956 |
| 1075    | 230    | 358   | 59649   | 970  | 136728  | 32.60649 | 1.059528 |
| 16657   | 2745   | 6513  | 281064  | 2405 | 453505  | 96.77576 | 14.72759 |
| 75228   | 18164  | 21569 | 154118  | 2423 | 482164  | 106.56   | 69.04108 |
| 2376    | 430    | 919   | 141396  | 1676 | 257918  | 62.21733 | 2.384699 |
| 2935    | 625    | 790   | 47357   | 932  | 132846  | 34.6406  | 3.19315  |
| 784     | 164    | 180   | 25272   | 592  | 80878   | 23.85827 | 0.967599 |
| 18093   | 2838   | 1808  | 68908   | 3139 | 640503  | 130.4411 | 15.44162 |
| 1883    | 341    | 231   | 6335    | 257  | 38570   | 10.66263 | 2.187057 |

|        |       |       |        |      |        |          |          |
|--------|-------|-------|--------|------|--------|----------|----------|
| 4531   | 696   | 1038  | 163304 | 3286 | 690211 | 157.8564 | 4.359195 |
| 2334   | 378   | 470   | 87425  | 2008 | 324684 | 71.4346  | 2.164624 |
| 778    | 177   | 260   | 28444  | 621  | 88528  | 19.17693 | 0.712647 |
| 84063  | 29079 | 16379 | 83423  | 2444 | 502661 | 118.2222 | 83.73261 |
| 4219   | 742   | 832   | 25536  | 603  | 83090  | 19.70916 | 4.247514 |
| 215211 | 65350 | 40319 | 202399 | 4486 | 932468 | 200.9632 | 197.2128 |
| 4112   | 705   | 1068  | 38017  | 676  | 95940  | 23.00452 | 4.200416 |
| 11581  | 2263  | 2710  | 94336  | 1795 | 307261 | 61.2769  | 9.85828  |
| 1295   | 251   | 404   | 53330  | 849  | 123185 | 30.06693 | 1.352288 |
| 6451   | 1164  | 997   | 15346  | 435  | 60191  | 13.67457 | 6.280326 |
| 4397   | 11855 | 9793  | 882    | 5    | 936    | 0.091073 | 1.836633 |
| 40160  | 9474  | 4893  | 109154 | 1439 | 205648 | 53.55648 | 44.97284 |





and subtracted.

| Pb206  | Pb207 | Pb208 | Th232  | U235 | U238    | U tot, ppm | Pb rad, ppm |
|--------|-------|-------|--------|------|---------|------------|-------------|
| 131362 | 20479 | 51428 | 191605 | 2324 | 323906  | 108.2487   | 120.329     |
| 301018 | 24577 | 48797 | 294214 | 8108 | 1162378 | 361.6819   | 256.9082    |
| 2335   | 1652  | 3833  | 923    | 36   | 2744    | #DIV/0!    | #DIV/0!     |
| 41196  | 2516  | 17909 | 257589 | 2668 | 382910  | 130.7673   | 38.64511    |
| 201156 | 16621 | 43258 | 266601 | 5540 | 783987  | 272.1875   | 191.982     |
| 7511   | 807   | 3093  | 145340 | 2490 | 340070  | 101.182    | 6.149957    |
| 62408  | 7778  | 29131 | 132660 | 1599 | 223036  | 75.28073   | 57.99281    |
| 12582  | 699   | 3845  | 226352 | 3657 | 508334  | 161.9974   | 11.04926    |
| 84393  | 8622  | 13586 | 59945  | 1595 | 229271  | 78.84185   | 80.01604    |
| 41744  | 2314  | 10580 | 528969 | 9968 | 1428516 | 520.54     | 41.96449    |
| 14441  | 820   | 5394  | 400188 | 4989 | 702275  | 255.683    | 14.51912    |
| 7862   | 456   | 2255  | 142019 | 2327 | 328959  | 118.7955   | 7.846389    |
| 217693 | 16115 | 18387 | 142935 | 7295 | 1030787 | 355.9679   | 207.8906    |

|         |        |        |         |       |         |          |          |
|---------|--------|--------|---------|-------|---------|----------|----------|
| 66822   | 4174   | 18385  | 259634  | 4040  | 573088  | 209.5345 | 67.6128  |
| 217120  | 15869  | 16745  | 116254  | 8636  | 1190248 | 417.6422 | 210.9934 |
| 6460    | 442    | 1975   | 117197  | 2047  | 287982  | 101.3314 | 6.298771 |
| 522644  | 60689  | 55519  | 382638  | 11676 | 1684341 | 590.2565 | 507.989  |
| 32465   | 1911   | 6473   | 153114  | 3531  | 499190  | 174.6519 | 31.66754 |
| 163946  | 9798   | 26618  | 392094  | 10696 | 1539014 | 550.6584 | 163.6683 |
| 14059   | 817    | 6067   | 547015  | 5859  | 841089  | 299.9133 | 13.99789 |
| 39361   | 2148   | 7760   | 355214  | 8574  | 1229652 | 432.8129 | 38.71806 |
| 109166  | 7488   | 25720  | 256581  | 4840  | 682905  | 234.2732 | 104.7287 |
| 207144  | 15073  | 65240  | 565894  | 8204  | 1138678 | 376.8515 | 191.8516 |
| 74509   | 4149   | 20083  | 672340  | 11569 | 1669419 | 592.0208 | 73.99789 |
| 251622  | 20445  | 19295  | 124798  | 7526  | 1038688 | 344.223  | 233.7233 |
| 37482   | 2110   | 5312   | 170191  | 6075  | 854558  | 299.6839 | 36.86471 |
| 4356210 | 672690 | 59827  | 205616  | 60856 | 8733788 | 3014.169 | 4219.995 |
| 3486    | 434    | 474    | 54429   | 1015  | 143907  | 49.19534 | 3.348479 |
| 25706   | 1288   | 3404   | 267398  | 9767  | 1402513 | 511.0325 | 26.32698 |
| 17476   | 916    | 4515   | 361333  | 6562  | 926782  | 343.3601 | 18.21101 |
| 59195   | 3417   | 15337  | 1038778 | 19341 | 2802950 | 915.9575 | 54.47462 |
| 26916   | 1753   | 7187   | 166759  | 3052  | 427217  | 153.6783 | 27.28323 |
| 184297  | 21768  | 59833  | 225449  | 2998  | 423693  | 147.5332 | 180.9514 |
| 251604  | 21671  | 44835  | 359111  | 8818  | 1255753 | 415.1958 | 234.9201 |
| 140272  | 7540   | 30868  | 1080303 | 23172 | 3305839 | 949.4283 | 113.8704 |
| 1032044 | 116986 | 30109  | 155749  | 17594 | 2558922 | 797.8833 | 910.1441 |
| 103710  | 81477  | 208647 | 138930  | 609   | 83146   | 22.66459 | 80.01742 |
| 10293   | 548    | 2918   | 199870  | 3483  | 484050  | 167.9046 | 10.11638 |
| 176108  | 11141  | 20321  | 215028  | 8838  | 1274252 | 390.216  | 152.8755 |
| 44405   | 2667   | 13088  | 185241  | 2833  | 411651  | 127.8822 | 39.13543 |
| 13760   | 690    | 3941   | 269272  | 4813  | 667604  | 203.7314 | 11.922   |
| 22484   | 1199   | 5177   | 475018  | 10056 | 1441319 | 416.7227 | 18.47726 |
| 49742   | 3636   | 21643  | 162403  | 1674  | 240151  | 68.85226 | 40.55159 |
| 1673187 | 138079 | 396427 | 2566102 | 49558 | 7111849 | 1975.24  | 1322.377 |
| 8213    | 447    | 2256   | 146663  | 2839  | 387819  | 115.8657 | 6.989188 |
| 868094  | 143916 | 364322 | 1034255 | 10165 | 1476898 | 452.4638 | 757.9407 |
| 17709   | 1427   | 7711   | 48570   | 508   | 70928   | 22.45127 | 15.98797 |
| 29304   | 1993   | 13565  | 181027  | 1896  | 262927  | 90.4081  | 28.7606  |
| 16745   | 928    | 4195   | 232432  | 4730  | 659474  | 197.6484 | 14.33349 |
| 69561   | 3862   | 7728   | 157946  | 6980  | 1004722 | 319.1944 | 63.18022 |
| 235871  | 31972  | 33095  | 209154  | 7252  | 1026714 | 331.3276 | 217.7626 |
| 20136   | 1293   | 7848   | 110371  | 1331  | 185112  | 70.38265 | 21.9546  |
| 5090    | 294    | 1557   | 98285   | 1594  | 224573  | 80.66637 | 5.248114 |
| 63607   | 4032   | 31674  | 397613  | 3671  | 512074  | 166.7058 | 59.46914 |
| 390121  | 31290  | 103853 | 667091  | 11164 | 1602586 | 481.6045 | 336.9655 |
| 17094   | 13905  | 36252  | 5132    | 105   | 12230   | 836.2076 | 3361.737 |
| 249013  | 27460  | 30441  | 117966  | 4335  | 617609  | 219.314  | 254.537  |
| 132758  | 6975   | 13687  | 426880  | 20283 | 2924867 | 868.7875 | 113.5987 |
| 10092   | 574    | 1971   | 102480  | 2723  | 381873  | 117.0771 | 8.92097  |
| 85153   | 6084   | 12532  | 99046   | 3072  | 437561  | 144.4949 | 81.13271 |
| 35075   | 1962   | 9838   | 236060  | 4125  | 579456  | 205.1745 | 35.85972 |
| 14983   | 833    | 2646   | 123297  | 3861  | 538112  | 152.5857 | 12.27945 |
| 9044    | 567    | 2529   | 166767  | 3012  | 433156  | 131.4785 | 7.940275 |
| 15290   | 806    | 6653   | 588668  | 6478  | 905500  | 275.3912 | 13.45709 |

|        |       |        |         |       |         |          |          |
|--------|-------|--------|---------|-------|---------|----------|----------|
| 195543 | 12267 | 35166  | 1009999 | 28582 | 4122364 | 1236.631 | 169.9166 |
| 164053 | 9021  | 78769  | 2710033 | 25679 | 3652055 | 981.2324 | 127.7811 |
| 68115  | 4955  | 18098  | 469849  | 10311 | 1459306 | 426.2472 | 57.72358 |
| 48021  | 2793  | 13855  | 301075  | 4537  | 653800  | 222.6793 | 47.48563 |
| 9245   | 566   | 2216   | 134128  | 3465  | 481535  | 175.1678 | 9.773594 |
| 26138  | 1386  | 9539   | 589548  | 7186  | 1007066 | 335.8733 | 25.35516 |
| 583642 | 69168 | 100800 | 391670  | 9622  | 1400348 | 460.6135 | 558.6618 |
| 48453  | 2623  | 9623   | 288129  | 6900  | 962671  | 354.384  | 51.95129 |
| 256060 | 31534 | 89822  | 329057  | 3880  | 549498  | 185.0028 | 251.2685 |
| 62986  | 3489  | 10865  | 304412  | 8609  | 1228798 | 413.3859 | 61.81391 |
| 7423   | 378   | 1922   | 112967  | 2156  | 303561  | 107.176  | 7.651154 |
| 52617  | 2903  | 6921   | 173559  | 6368  | 896317  | 300.8587 | 51.59377 |
| 31995  | 9465  | 35385  | 1386192 | 9696  | 1372314 | 442.2383 | 30.14785 |
| 239370 | 27615 | 34542  | 140317  | 3935  | 560743  | 171.7799 | 214.5654 |
| 295482 | 32484 | 24051  | 104462  | 5207  | 750686  | 289.1415 | 333.2787 |
| 7770   | 443   | 2426   | 176581  | 2541  | 360713  | 140.034  | 8.843166 |
| 70363  | 5234  | 30581  | 307853  | 3105  | 429942  | 148.3073 | 71.1861  |
| 7265   | 536   | 2181   | 19375   | 302   | 41328   | 15.15789 | 7.821251 |
| 140834 | 9205  | 12307  | 130963  | 7067  | 991851  | 345.3269 | 144.0439 |
| 8207   | 554   | 2467   | 154200  | 2618  | 370419  | 128.947  | 8.398349 |
| 82289  | 6003  | 49023  | 429146  | 3159  | 448800  | 148.2371 | 79.96853 |
| 92686  | 9897  | 65046  | 3356186 | 24183 | 3438586 | 1005.942 | 79.85133 |
| 68557  | 5606  | 24090  | 154874  | 1969  | 272964  | 90.01764 | 66.62409 |

and subtracted.

| Pb206  | Pb207 | Pb208  | Th232   | U235  | U238    | U tot, ppm | Pb rad, ppn |
|--------|-------|--------|---------|-------|---------|------------|-------------|
| 457592 | 77492 | 82106  | 1193912 | 15116 | 2172573 | 708.2301   | 501.7396    |
| 161291 | 10120 | 125815 | 2302224 | 11148 | 1585967 | 156.1312   | 53.47209    |
| 42755  | 2303  | 12413  | 1035908 | 15013 | 2144610 | 218.3176   | 14.67452    |
| 107323 | 8974  | 39199  | 368794  | 3817  | 533237  | 166.7675   | 113.298     |
| 51816  | 3297  | 20036  | 403342  | 3894  | 543396  | 168.5551   | 54.31801    |
| 165021 | 18358 | 56883  | 376663  | 3687  | 522881  | 154.4765   | 164.9483    |
| 23118  | 2718  | 7925   | 1356071 | 29445 | 4211568 | 1259.83    | 23.431      |
| 11240  | 595   | 1983   | 148970  | 3195  | 446952  | 136.2507   | 11.62008    |
| 29735  | 1483  | 7500   | 833185  | 11971 | 1706661 | 500.5757   | 29.61138    |
| 129239 | 7033  | 12651  | 330142  | 22637 | 3209405 | 959.2894   | 131.3342    |
| 44183  | 2358  | 8808   | 458112  | 8185  | 1173157 | 335.5832   | 43.01315    |
| 58223  | 4689  | 17693  | 199211  | 2269  | 313381  | 89.47033   | 56.64301    |
| 25850  | 1336  | 7419   | 716460  | 9227  | 1304595 | 333.4422   | 22.54246    |
| 303824 | 22485 | 121293 | 2661855 | 26029 | 3723812 | 1384.73    | 385.9174    |
| 29687  | 19735 | 55305  | 310490  | 929   | 128105  | 44.96542   | 35.63776    |
| 10615  | 574   | 1343   | 110134  | 3185  | 444187  | 131.6696   | 10.77313    |
| 230856 | 15988 | 11714  | 177580  | 12065 | 1727430 | 492.7534   | 225.7496    |
| 60786  | 4506  | 7788   | 104083  | 2792  | 390689  | 120.3806   | 64.28545    |
| 18031  | 959   | 3787   | 198572  | 3409  | 476185  | 151.3587   | 19.69465    |
| 4551   | 278   | 947    | 98219   | 1912  | 267511  | 82.00943   | 4.799044    |

|        |       |       |         |       |         |          |          |
|--------|-------|-------|---------|-------|---------|----------|----------|
| 10823  | 1608  | 3835  | 212905  | 4966  | 686888  | 238.6854 | 12.97157 |
| 40768  | 2264  | 3085  | 87897   | 6933  | 964120  | 312.7321 | 45.65731 |
| 36864  | 1957  | 14075 | 1138022 | 10835 | 1544269 | 459.9776 | 37.96037 |
| 108259 | 6037  | 12024 | 406823  | 13546 | 1936226 | 626.0941 | 121.1596 |
| 58794  | 5143  | 16024 | 157662  | 1919  | 272063  | 88.10859 | 65.98689 |
| 17835  | 987   | 3753  | 217863  | 3658  | 520280  | 160.33   | 19.07057 |
| 45596  | 2407  | 1905  | 113853  | 9780  | 1363272 | 428.4372 | 49.77918 |
| 13791  | 1501  | 4142  | 141547  | 3202  | 451514  | 135.995  | 14.44975 |
| 15908  | 1180  | 8044  | 906912  | 6579  | 908674  | 275.9345 | 16.82039 |
| 142751 | 8611  | 27453 | 639832  | 11595 | 1643239 | 465.0402 | 140.8515 |
| 74755  | 3944  | 7705  | 475368  | 16111 | 2309504 | 695.1885 | 78.56015 |
| 57371  | 3122  | 7688  | 363873  | 9629  | 1353681 | 403.226  | 59.73866 |
| 60635  | 3558  | 22138 | 565768  | 5394  | 754427  | 206.285  | 58.02307 |
| 99394  | 7557  | 15541 | 197243  | 4204  | 593788  | 175.2406 | 102.7769 |
| 32627  | 26825 | 67768 | 78795   | 222   | 31231   | 13.23663 | 48.51094 |
| 24127  | 1215  | 2803  | 1059153 | 33993 | 4866971 | 1455.58  | 25.32177 |
| 227454 | 14898 | 13330 | 196180  | 15708 | 2206672 | 632.3368 | 229.2187 |
| 176864 | 14078 | 47693 | 665949  | 8888  | 1268382 | 363.752  | 178.5976 |
| 99952  | 5310  | 16917 | 1031714 | 21127 | 3006440 | 897.9871 | 105.2559 |
| 5854   | 331   | 1161  | 69779   | 1507  | 204267  | 64.74128 | 6.549258 |
| 12876  | 766   | 3124  | 440530  | 7126  | 993776  | 319.781  | 14.69904 |
| 32305  | 1644  | 7224  | 999378  | 16443 | 2337216 | 722.8521 | 35.47577 |
| 311214 | 26234 | 55882 | 645686  | 13196 | 1865771 | 589.9532 | 349.9443 |
| 14568  | 824   | 3354  | 359604  | 6088  | 837548  | 250.8684 | 15.54079 |
| 1907   | 113   | 580   | 208329  | 2567  | 352354  | 114.7672 | 2.215662 |
| 14185  | 764   | 2372  | 129088  | 2774  | 388277  | 124.8217 | 16.27699 |
| 273041 | 30391 | 33111 | 236932  | 6633  | 911380  | 295.3128 | 316.1984 |
| 12381  | 673   | 4796  | 762803  | 7090  | 1001731 | 308.92   | 13.66458 |
| 46751  | 5377  | 9458  | 79518   | 2499  | 343102  | 109.5382 | 53.47974 |
| 132548 | 8436  | 34329 | 733856  | 9663  | 1375102 | 429.6636 | 148.58   |
| 205383 | 12425 | 20052 | 468601  | 16289 | 2328405 | 687.2746 | 217.7608 |
| 27523  | 2960  | 18457 | 214814  | 1051  | 151563  | 45.47209 | 29.69807 |
| 99239  | 6537  | 8146  | 140477  | 6065  | 833808  | 269.1266 | 115.3421 |
| 224546 | 24169 | 51646 | 426793  | 6157  | 857964  | 244.6124 | 230.8274 |
| 73247  | 4930  | 14688 | 758663  | 15960 | 2253804 | 721.5048 | 84.64642 |
| 6262   | 305   | 1451  | 163405  | 2529  | 357511  | 118.9362 | 7.548685 |
| 87009  | 6185  | 15032 | 206528  | 4292  | 595491  | 185.3482 | 98.26497 |
| 58352  | 2904  | 13242 | 1557684 | 25412 | 3589421 | 1179.173 | 69.62847 |
| 50685  | 3190  | 10013 | 471861  | 10258 | 1444242 | 408.8967 | 52.20764 |
| 47073  | 2635  | 13687 | 506884  | 6045  | 860967  | 265.0867 | 52.78901 |
| 66820  | 3645  | 11590 | 675439  | 14090 | 2044029 | 604.1462 | 72.03151 |
| 85536  | 6627  | 15180 | 221668  | 4776  | 665483  | 194.1065 | 91.10345 |
| 47617  | 3033  | 28169 | 678724  | 3971  | 546142  | 167.0887 | 53.26648 |
| 57064  | 3259  | 9484  | 299598  | 6224  | 877617  | 257.0446 | 61.18509 |
| 2639   | 156   | 668   | 78759   | 1241  | 174914  | 55.40678 | 3.065986 |
| 31888  | 2252  | 7458  | 100988  | 1641  | 229571  | 67.72461 | 34.52825 |
| 23328  | 18909 | 48523 | 34123   | 183   | 25865   | 88.57949 | 293.6217 |
| 10830  | 827   | 4963  | 68833   | 550   | 78375   | 26.59754 | 13.52551 |
| 2824   | 150   | 690   | 73308   | 1309  | 178625  | 56.68708 | 3.303195 |
| 55535  | 5396  | 5170  | 344054  | 9640  | 1370929 | 485.6435 | 72.58432 |
| 345775 | 25268 | 53585 | 679769  | 15715 | 2252348 | 744.06   | 421.9667 |



|        |       |        |         |       |         |          |          |
|--------|-------|--------|---------|-------|---------|----------|----------|
| 21947  | 1365  | 16960  | 374663  | 1766  | 252642  | 78.22393 | 25.13627 |
| 127179 | 10007 | 101081 | 1158565 | 5152  | 731266  | 244.211  | 157.3109 |
| 15638  | 1061  | 8071   | 814531  | 6646  | 912975  | 302.9343 | 19.29102 |
| 181076 | 26942 | 33547  | 176813  | 3356  | 460318  | 164.7025 | 241.2203 |
| 23439  | 1153  | 6063   | 2303682 | 33357 | 4736776 | 1635.941 | 30.19472 |
| 127445 | 11148 | 20162  | 172300  | 5112  | 705188  | 229.194  | 154.615  |
| 148007 | 24281 | 36634  | 188871  | 2548  | 357306  | 110.2878 | 170.7559 |
| 589777 | 44618 | 38983  | 502724  | 27022 | 3830048 | 1043.943 | 601.6318 |
| 6553   | 340   | 1408   | 156466  | 2828  | 382466  | 105.1277 | 6.750347 |
| 138929 | 8807  | 19375  | 360482  | 10606 | 1512512 | 414.9192 | 143.0119 |
| 39672  | 2187  | 11326  | 535543  | 6894  | 976609  | 254.516  | 38.84992 |
| 119717 | 8909  | 24959  | 345887  | 6317  | 884098  | 253.6104 | 129.2093 |
| 76349  | 4608  | 14267  | 337987  | 6915  | 959734  | 285.0701 | 85.43496 |
| 24466  | 1942  | 8557   | 99571   | 1030  | 139183  | 51.47572 | 34.13417 |

and subtracted.

| Pb206  | Pb207 | Pb208 | Th232  | U235 | U238    | U tot, ppm | Pb rad, ppn |
|--------|-------|-------|--------|------|---------|------------|-------------|
| 2139   | 455   | 554   | 28023  | 551  | 81829   | 117.2439   | 10.34318    |
| 25253  | 3961  | 6521  | 270638 | 4456 | 910849  | 1207.595   | 113.365     |
| 21392  | 3367  | 2279  | 73230  | 2957 | 621335  | 822.4162   | 96.19447    |
| 121394 | 64929 | 23260 | 64424  | 1255 | 179248  | 236.8873   | 547.009     |
| 4863   | 904   | 877   | 24309  | 620  | 88293   | 121.5248   | 22.90692    |
| 11810  | 1944  | 2210  | 93708  | 2265 | 457224  | 603.4657   | 53.5147     |
| 3995   | 679   | 1198  | 32912  | 500  | 70552   | 96.64998   | 18.864      |
| 10814  | 1719  | 1708  | 56526  | 1597 | 227045  | 318.3387   | 52.43024    |
| 38457  | 9125  | 16599 | 107693 | 1014 | 138826  | 194.348    | 186.8109    |
| 30817  | 7436  | 8829  | 58085  | 800  | 115245  | 157.8208   | 146.9404    |
| 10812  | 1730  | 4480  | 925307 | 6492 | 1345228 | 1818.54    | 51.05477    |
| 15722  | 2481  | 2841  | 99234  | 2357 | 485330  | 660.1528   | 74.97439    |
| 5820   | 1282  | 2022  | 34309  | 437  | 62516   | 108.414    | 35.5083     |
| 16170  | 3969  | 4101  | 25994  | 428  | 59956   | 80.34328   | 76.48034    |
| 54527  | 9892  | 559   | 11829  | 3278 | 687268  | 929.1541   | 261.0533    |
| 1984   | 382   | 757   | 68029  | 900  | 124317  | 194.1649   | 11.01205    |
| 29564  | 6816  | 5029  | 35083  | 847  | 120819  | 155.1795   | 135.3784    |
| 60391  | 13982 | 11904 | 87906  | 1906 | 302529  | 385.0383   | 274.9282    |
| 21481  | 3967  | 8189  | 139132 | 1589 | 228722  | 290.1331   | 97.78547    |
| 20242  | 4989  | 6376  | 40782  | 545  | 76924   | 101.4424   | 96.10593    |
| 55412  | 8487  | 4132  | 142330 | 8413 | 1753700 | 2303.661   | 264.6436    |
| 38943  | 12110 | 5153  | 23547  | 722  | 102208  | 132.6507   | 184.3201    |
| 8180   | 1320  | 941   | 67648  | 2910 | 596088  | 710.8084   | 35.68896    |
| 34412  | 6716  | 11697 | 125461 | 1607 | 223443  | 271.0843   | 153.2181    |
| 21696  | 3753  | 6131  | 113944 | 1774 | 254037  | 322.0661   | 101.2599    |
| 6513   | 1255  | 1267  | 36132  | 1013 | 142388  | 181.814    | 30.71612    |
| 100487 | 30686 | 18570 | 85349  | 1896 | 313730  | 370.1249   | 439.1355    |
| 73338  | 22494 | 10143 | 47476  | 1416 | 196218  | 239.8271   | 333.0485    |
| 32465  | 5925  | 5502  | 163691 | 4952 | 1012810 | 1104.397   | 131.9491    |
| 38198  | 21067 | 5524  | 17566  | 469  | 65782   | 85.75758   | 186.144     |

|        |        |       |        |      |         |          |          |
|--------|--------|-------|--------|------|---------|----------|----------|
| 7596   | 1673   | 4328  | 511522 | 2924 | 607414  | 657.496  | 30.82688 |
| 16814  | 2903   | 2527  | 78469  | 2553 | 527094  | 657.9405 | 78.91062 |
| 18118  | 3343   | 4563  | 61691  | 1092 | 148168  | 197.0198 | 90.86156 |
| 29391  | 6794   | 6151  | 43536  | 889  | 122236  | 154.9451 | 140.9154 |
| 15555  | 2843   | 4141  | 57088  | 924  | 128997  | 175.1349 | 80.10611 |
| 593224 | 135956 | 35884 | 149731 | 6712 | 1375760 | 1636.754 | 2684.847 |
| 3366   | 664    | 870   | 52421  | 945  | 133446  | 193.2974 | 18.60404 |
| 2829   | 688    | 948   | 67205  | 1111 | 161881  | 219.7658 | 14.70192 |
| 14060  | 3702   | 4152  | 26109  | 400  | 54762   | 81.9099  | 80.68539 |
| 7722   | 1229   | 1226  | 43212  | 1234 | 172193  | 235.5742 | 40.63979 |
| 40858  | 12227  | 8960  | 43425  | 815  | 116915  | 163.6968 | 221.8854 |
| 22877  | 4362   | 677   | 6253   | 1155 | 163427  | 218.9499 | 119.1993 |
| 24176  | 4087   | 4267  | 115568 | 3014 | 628245  | 806.4715 | 121.0201 |
| 36198  | 9215   | 4851  | 29980  | 997  | 139614  | 174.64   | 177.0186 |
| 91018  | 29810  | 13618 | 60350  | 1706 | 233709  | 327.9844 | 500.6662 |
| 3023   | 665    | 643   | 31341  | 885  | 127403  | 198.6325 | 18.52755 |
| 51214  | 8263   | 5784  | 248924 | 8003 | 1649650 | 2083.2   | 254.7854 |
| 22677  | 3543   | 2495  | 183989 | 7816 | 1616276 | 2033.502 | 112.6695 |
| 26635  | 4407   | 2782  | 57484  | 2447 | 502709  | 535.1361 | 112.2617 |
| 1463   | 316    | 429   | 75747  | 1528 | 215167  | 263.0546 | 7.106115 |
| 25358  | 4146   | 2892  | 87073  | 3375 | 681490  | 787.2632 | 116.551  |
| 32099  | 7717   | 11275 | 442981 | 5170 | 1069993 | 1234.995 | 147.7708 |
| 4791   | 984    | 1301  | 17702  | 304  | 42764   | 51.22227 | 22.9417  |
| 7018   | 1977   | 1770  | 36485  | 1152 | 156531  | 185.7756 | 33.37573 |
| 1715   | 346    | 466   | 33316  | 604  | 84359   | 105.4906 | 8.619987 |
| 13057  | 3180   | 3013  | 20747  | 376  | 53558   | 62.82341 | 61.65543 |
| 78475  | 17775  | 7030  | 52921  | 2523 | 516238  | 545.8847 | 334.806  |
| 2847   | 570    | 664   | 48287  | 1099 | 154503  | 203.056  | 15.1349  |
| 141436 | 31127  | 60502 | 734811 | 4909 | 1011927 | 1116.907 | 632.6631 |
| 27075  | 5325   | 10866 | 121460 | 1355 | 191804  | 220.2794 | 126.2865 |
| 36591  | 6259   | 7007  | 178757 | 4378 | 891205  | 988.7466 | 165.9227 |
| 78014  | 17847  | 9865  | 76604  | 2560 | 510271  | 556.6662 | 348.5634 |
| 32871  | 5932   | 28860 | 641416 | 2043 | 390649  | 407.8993 | 140.8519 |
| 79826  | 24123  | 17271 | 87872  | 1651 | 225690  | 262.0745 | 381.1607 |
| 39561  | 13109  | 7422  | 35673  | 738  | 103659  | 128.5623 | 202.1455 |
| 158654 | 56072  | 10805 | 54525  | 2701 | 555150  | 643.027  | 758.5781 |
| 24946  | 3924   | 2035  | 77727  | 3946 | 796276  | 940.3361 | 121.8236 |
| 2569   | 562    | 703   | 79010  | 1446 | 201184  | 243.775  | 12.90339 |
| 62477  | 23188  | 4472  | 19849  | 1069 | 147300  | 189.4038 | 333.4715 |
| 12551  | 2578   | 2859  | 35651  | 668  | 94150   | 123.4225 | 68.42358 |
| 1407   | 302    | 357   | 25958  | 526  | 72997   | 93.48714 | 7.510229 |
| 23594  | 4896   | 3618  | 38592  | 1062 | 150637  | 171.9783 | 112.4112 |
| 22723  | 3959   | 3619  | 96404  | 2882 | 585170  | 662.3873 | 107.5257 |
| 31867  | 4884   | 3702  | 151812 | 5588 | 1156242 | 1336.037 | 154.192  |
| 14718  | 3483   | 3544  | 26498  | 458  | 64364   | 74.33921 | 71.29328 |
| 7748   | 1135   | 964   | 65191  | 2320 | 471772  | 537.1201 | 37.05285 |
| 34766  | 7099   | 6559  | 64290  | 1449 | 199758  | 222.9895 | 163.2892 |
| 97610  | 20254  | 10741 | 110938 | 4460 | 916458  | 1005.179 | 451.1288 |
| 21780  | 3773   | 4502  | 90643  | 1823 | 259811  | 308.371  | 109.0897 |
| 4643   | 3556   | 3243  | 60936  | 1073 | 150242  | 181.8807 | 23.75617 |
| 4239   | 935    | 1035  | 65850  | 1540 | 215553  | 252.9532 | 21.14368 |

|        |        |       |        |      |         |          |          |
|--------|--------|-------|--------|------|---------|----------|----------|
| 21832  | 3794   | 2788  | 54580  | 1805 | 286560  | 298.9374 | 96.91594 |
| 52621  | 23787  | 20550 | 73063  | 959  | 134619  | 156.0105 | 259.828  |
| 24484  | 3967   | 4484  | 136774 | 3319 | 685818  | 740.6681 | 112.7954 |
| 1279   | 272    | 381   | 24484  | 417  | 60146   | 68.23839 | 6.200902 |
| 18300  | 2927   | 3314  | 108914 | 2700 | 554213  | 614.9723 | 86.8256  |
| 16986  | 2722   | 3828  | 147832 | 2935 | 597316  | 694.8868 | 84.59487 |
| 1630   | 341    | 395   | 23620  | 551  | 76314   | 90.67546 | 8.300701 |
| 62093  | 15339  | 11588 | 75165  | 1557 | 227983  | 256.4171 | 299.6027 |
| 50773  | 9139   | 3587  | 51852  | 3333 | 678471  | 771.8829 | 248.0621 |
| 5766   | 1394   | 2099  | 61588  | 973  | 128201  | 151.6145 | 29.31313 |
| 221325 | 118854 | 7436  | 21464  | 3164 | 653382  | 837.3557 | 1220.424 |
| 17196  | 2663   | 2154  | 107235 | 3727 | 771371  | 929.3461 | 89.21549 |
| 81476  | 24692  | 11212 | 61204  | 1693 | 240324  | 255.8852 | 373.9324 |
| 8832   | 1789   | 2802  | 42624  | 582  | 79520   | 99.0498  | 47.45893 |
| 2328   | 393    | 487   | 33206  | 716  | 103964  | 129.594  | 12.53243 |
| 17454  | 2776   | 3266  | 115928 | 2602 | 550233  | 629.4566 | 86.26657 |
| 20104  | 3765   | 6582  | 101352 | 1323 | 184709  | 229.378  | 107.9581 |
| 6369   | 961    | 3337  | 565977 | 3078 | 625242  | 737.5242 | 32.51889 |
| 26150  | 4106   | 2980  | 121753 | 4510 | 917849  | 1112.077 | 137.5852 |
| 11450  | 1957   | 6919  | 167826 | 1116 | 160440  | 196.2351 | 60.8304  |
| 16200  | 2526   | 4006  | 205323 | 3400 | 703686  | 826.688  | 82.722   |
| 454    | 186    | 196   | 26424  | 466  | 66193   | 73.40635 | 2.19063  |
| 10446  | 2136   | 2494  | 35261  | 633  | 89556   | 106.9762 | 54.2601  |
| 35544  | 8162   | 9481  | 75580  | 1148 | 161838  | 176.5673 | 168.6834 |
| 25151  | 4221   | 1346  | 40665  | 4310 | 856976  | 1283.473 | 163.9183 |
| 1920   | 373    | 670   | 65452  | 869  | 121626  | 147.3522 | 10.12331 |
| 15792  | 2513   | 3689  | 142986 | 2778 | 563658  | 609.786  | 74.36414 |
| 70186  | 14867  | 5379  | 49721  | 2767 | 565449  | 582.3718 | 314.7038 |
| 96860  | 23506  | 17403 | 124555 | 2906 | 592726  | 616.8342 | 438.8666 |
| 106084 | 66940  | 12982 | 43942  | 1345 | 188549  | 206.8345 | 506.7122 |
| 131954 | 29044  | 17634 | 160701 | 5070 | 1054052 | 1065.655 | 580.911  |
| 16992  | 2903   | 2784  | 103649 | 2921 | 595689  | 652.8326 | 81.09106 |
| 5392   | 812    | 1431  | 102277 | 1610 | 238345  | 265.2211 | 26.12656 |
| 695    | 119    | 336   | 55945  | 499  | 73438   | 78.24151 | 3.228502 |
| 17326  | 3099   | 7963  | 123163 | 1132 | 158761  | 168.5374 | 80.074   |
| 28949  | 4427   | 9192  | 510507 | 4948 | 1014959 | 1091.165 | 135.461  |
| 8689   | 1312   | 2320  | 189012 | 3096 | 640818  | 709.077  | 41.84491 |
| 56293  | 11929  | 8933  | 79676  | 2046 | 398748  | 367.5733 | 225.7806 |
| 294805 | 124097 | 27546 | 101476 | 3530 | 732484  | 805.76   | 1410.674 |

n

















n



n
