# Supplementary material
Source: publisher figshare collection journal article supplement (https://geolsoc.figshare.com/articles/dataset/_/3452948)
Supplement: Supplementary file 4 [file 1]

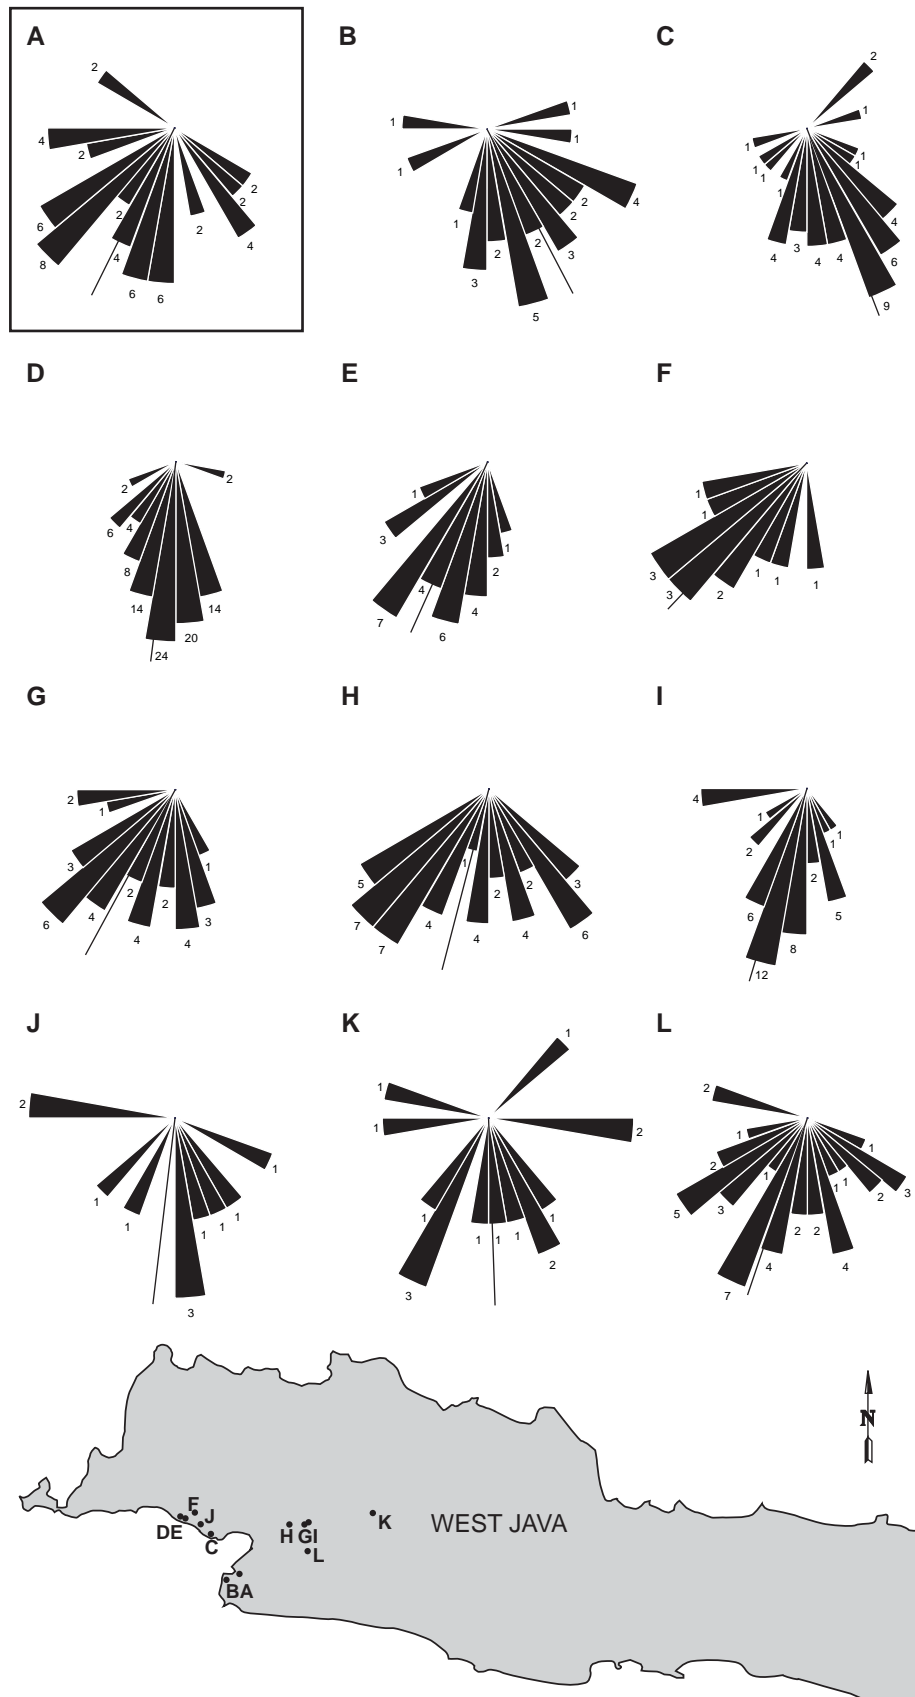

Paleocurrent data from Paleogene sedimentary sequences in West Java. Locations shown in Fig. 1. A: Ciemas Fm., B: Ciletuh Fm., C: Bayah Fm. (Karantarage), D: Bayah Fm. (Cibodas), E: Bayah Fm. (Cihara), F: Bayah Fm. (Cisiih), G: Bayah Fm. (G. Walat), H: Bayah Fm. (Cisaat), I: Bayah Fm. (Pasisir Bongkok), J: Cijengkol Fm. (Ciapus), K: Cikalong Fm. (Padalarang), L: Cikalong Fm. (Cikalong). Number of measurements indicated for each 10° segment.
