# Supplementary material
Source: publisher figshare collection journal article supplement (https://geolsoc.figshare.com/articles/dataset/_/3452948)
Supplement: Supplementary file 5 [file 1]

Table 9

Point Count Data - Total Points Counted

| Sample | Formation | ID         | Count | Zircon | Tourmaline | Rutile |
|--------|-----------|------------|-------|--------|------------|--------|
| 1 1C   | Bayah     | JBC2WAL11  | 200   | 159    | 3          | 4      |
| 2 2C   | Bayah     | JBC2WAL13  | 200   | 174    | 8          | 12     |
| 4 4B   | Bayah     | JBC2BAY18  | 200   | 154    | 8          | 18     |
| 5 5B   | Bayah     | JBC2BAY20  | 67    | 49     |            | 4      |
| 6 6B   | Bayah     | JBC3BAY18  | 200   | 157    | 7          | 10     |
| 8 8A   | Ciemas    | JBC2CIE259 | 200   | 124    | 22         | 16     |
| 9 9A   | Ciemas    | JBC2CIE268 | 200   | 148    | 8          | 14     |
| 12 12A | Ciemas    | JBC3CIE135 | 200   | 152    | 11         | 16     |
| 13 13B | Cijengkol | JBC2CIJ191 | 200   | 156    | 4          | 14     |
| 17 17B | Cijengkol | JBC2CIJ216 | 200   | 160    | 4          | 15     |
| 19 19D | Cikalong  | JBC2CIK093 | 200   | 145    | 16         | 10     |
| 22 22D | Cikalong  | JBC2CIK117 | 200   | 137    | 4          | 14     |
| 23 23C | Cikalong  | JBC2CIK176 | 200   | 138    | 4          | 3      |
| 26 26D | Cikalong  | JBC3CIK2   | 193   | 144    | 6          | 12     |

Table 10

Point Count Data - % Total Points

| Sample | Formation | ID         | Count | Zircon | Tourmaline | Rutile |
|--------|-----------|------------|-------|--------|------------|--------|
| 1 1C   | Bayah     | JBC2WAL129 |       | 79.5   | 1.5        | 2      |
| 2 2C   | Bayah     | JBC2WAL137 |       | 87     | 4          | 6      |
| 4 4B   | Bayah     | JBC2BAY187 |       | 77     | 4          | 9      |
| 5 5B   | Bayah     | JBC2BAY203 |       | 73.1   | 0          | 6      |
| 6 6B   | Bayah     | JBC3BAY180 |       | 78.5   | 3.5        | 5      |
| 8 8A   | Ciemas    | JBC2CIE259 |       | 62     | 11         | 8      |
| 9 9A   | Ciemas    | JBC2CIE268 |       | 74     | 4          | 7      |
| 12 12A | Ciemas    | JBC3CIE135 |       | 76     | 5.5        | 8      |
| 13 13B | Cijengkol | JBC2CIJ191 |       | 78     | 2          | 7      |
| 17 17B | Cijengkol | JBC2CIJ216 |       | 80     | 2          | 7.5    |
| 19 19D | Cikalong  | JBC2CIK093 |       | 72.5   | 8          | 5      |
| 22 22D | Cikalong  | JBC2CIK117 |       | 68.5   | 2          | 7      |
| 23 23C | Cikalong  | JBC2CIK176 |       | 69     | 2          | 1.5    |
| 26 26D | Cikalong  | JBC3CIK2   |       | 74.6   | 3.1        | 6.2    |

| Anatase | Apatite | Garnet | Monazite | Silimanite | Amphibole | Cassiterite | Spinel | Chlorite |
|---------|---------|--------|----------|------------|-----------|-------------|--------|----------|
|         |         |        | 10       |            |           |             | 2      |          |
|         |         |        |          |            |           |             | 2      | 1        |
|         | 2       |        | 5        |            | 2         | 5           | 1      | 1        |
| 1       |         |        |          |            |           |             |        |          |
|         |         |        | 8        |            |           |             | 3      |          |
| 3       | 3       | 2      | 4        |            | 1         | 5           | 6      |          |
| 2       | 3       |        | 6        | 1          |           | 4           | 1      |          |
| 2       |         |        | 7        | 2          |           | 5           | 1      |          |
| 4       |         |        | 5        |            |           | 6           |        |          |
| 2       |         | 1      | 4        |            |           | 5           |        |          |
| 1       | 14      | 1      |          |            |           | 4           | 2      | 1        |
| 1       | 24      | 1      |          |            | 1         | 6           |        |          |
|         | 40      | 4      |          |            |           | 1           |        |          |
| 1       | 19      |        |          |            | 2         | 2           |        |          |

| Anatase | Apatite | Garnet | Monazite | Silimanite | Amphibole | Cassiterite | Spinel | Chlorite |
|---------|---------|--------|----------|------------|-----------|-------------|--------|----------|
| 0       | 0       | 0      | 5        | 0          | 0         | 1           | 0      | 0        |
| 0       | 0       | 0      | 0        | 0          | 0         | 1           | 0.5    | 0        |
| 0       | 1       | 0      | 2.5      | 0          | 1         | 2.5         | 0.5    | 0.5      |
| 1.5     | 0       | 0      | 0        | 0          | 0         | 0           | 0      | 0        |
| 0       | 0       | 0      | 4        | 0          | 0         | 1.5         | 0      | 0        |
| 1.5     | 1.5     | 1      | 2        | 0          | 0.5       | 2.5         | 3      | 0        |
| 1       | 1.5     | 0      | 3        | 0.5        | 0         | 2           | 0.5    | 0        |
| 1       | 0       | 0      | 3.5      | 1          | 0         | 2.5         | 0.5    | 0        |
| 2       | 0       | 0      | 2.5      | 0          | 0         | 3           | 0      | 0        |
| 1       | 0       | 0.5    | 2        | 0          | 0         | 2.5         | 0      | 0        |
| 0.5     | 7       | 0.5    | 0        | 0          | 0         | 2           | 1      | 0.5      |
| 0.5     | 12      | 0.5    | 0        | 0          | 0.5       | 3           | 0      | 0        |
| 0       | 20      | 2      | 0        | 0          | 0         | 0.5         | 0      | 0        |
| 0.5     | 9.8     | 0      | 0        | 0          | 1         | 1           | 0      | 0        |

Vesuvianite Altered

|   |    |
|---|----|
|   | 22 |
|   | 3  |
|   | 4  |
|   | 13 |
|   | 15 |
|   | 14 |
|   | 13 |
|   | 4  |
|   | 11 |
|   | 9  |
| 1 | 5  |
|   | 12 |
|   | 10 |
|   | 7  |

Vesuvianite Altered

|     |      |
|-----|------|
| 0   | 11   |
| 0   | 1.5  |
| 0   | 2    |
| 0   | 19.4 |
| 0   | 7.5  |
| 0   | 7    |
| 0   | 6.5  |
| 0   | 2    |
| 0   | 5.5  |
| 0   | 4.5  |
| 0.5 | 2.5  |
| 0   | 6    |
| 0   | 5    |
| 0   | 3.6  |
