# Supplementary material
Source: publisher figshare collection journal article supplement (https://geolsoc.figshare.com/articles/dataset/_/3452948)
Supplement: Supplementary file 6 [file 1]

Table 11

Point count data from all formations shown as absolute numbers

| Sample | ID         | QMU | QMS | QP <5 | QP >5 | Chert |
|--------|------------|-----|-----|-------|-------|-------|
| 2 2C   | JBC2WAL11  | 160 | 11  | 21    | 70    | 15    |
| 3 3C   | JBC2WAL14  | 140 | 16  | 27    | 12    | 15    |
| 4 4B   | JBC2BAY18  | 175 | 11  | 11    | 25    | 12    |
| 6 6B   | JBC3BAY18  | 171 | 9   | 29    | 28    | 10    |
| 7 7B   | JBC3BAY18  | 168 | 30  | 24    | 12    | 15    |
| 8 8A   | JBC2CIE259 | 149 | 28  | 3     | 10    | 11    |
| 9 9A   | JBC2CIE268 | 131 | 32  | 2     | 3     | 5     |
| 9 9A   | JBC2CIE268 | 164 | 30  | 4     | 3     | 6     |
| 11 11A | JBC2CIE276 | 88  | 26  | 20    | 18    | 25    |
| 13 13B | JBC2CIJ191 | 163 | 8   | 28    | 0     | 4     |
| 14 14B | JBC2CIJ203 | 174 | 22  | 25    | 0     | 5     |
| 15 15B | JBC2CIJ210 | 90  | 27  | 9     | 17    | 4     |
| 16 16B | JBC2CIJ212 | 156 | 59  | 17    | 0     | 13    |
| 17 17B | JBC2CIJ216 | 152 | 38  | 11    | 0     | 5     |
| 19 19D | JBC2CIK093 | 142 | 7   | 13    | 18    | 12    |
| 20 20D | JBC2CIK095 | 197 | 17  | 11    | 21    | 8     |
| 21 21D | JBC2CIK100 | 137 | 18  | 13    | 12    | 6     |
| 22 22D | JBC2CIK117 | 151 | 11  | 10    | 29    | 9     |
| 24 24C | JBC2CIK182 | 167 | 9   | 3     | 5     | 4     |
| 25 25C | JBC2CIK184 | 134 | 6   | 9     | 27    | 6     |
| 27 27A | JBC2CIL266 | 17  | 5   | 25    | 17    | 9     |
| 28 28A | JBC2CIL272 | 34  | 6   | 22    | 32    | 18    |
| 29 29A | JBC3CIL138 | 27  | 2   | 30    | 19    | 26    |
| 31 31A | JBC3CIL149 | 2   | 1   | 2     | 1     | 0     |

Table 12

Point count data from all formations shown as percentages

| Sample | Sample ID  | QMU | QMS | QP <5 | QP >5 | Chert |
|--------|------------|-----|-----|-------|-------|-------|
| 2 2C   | JBC2WAL11  | 53  | 4   | 7     | 23    | 5     |
| 3 3C   | JBC2WAL14  | 47  | 5   | 9     | 4     | 5     |
| 4 4B   | JBC2BAY18  | 58  | 4   | 4     | 8     | 4     |
| 6 6B   | JBC3BAY18  | 57  | 3   | 10    | 9     | 3     |
| 7 7B   | JBC3BAY18  | 56  | 10  | 8     | 4     | 5     |
| 8 8A   | JBC2CIE259 | 50  | 9   | 1     | 3     | 4     |
| 9 9A   | JBC2CIE268 | 44  | 11  | 1     | 1     | 2     |
| 9 9A   | JBC2CIE268 | 55  | 10  | 1     | 1     | 2     |
| 11 11A | JBC2CIE276 | 29  | 9   | 7     | 6     | 8     |
| 13 13B | JBC2CIJ191 | 54  | 3   | 9     | 0     | 1     |
| 14 14B | JBC2CIJ203 | 58  | 7   | 8     | 0     | 2     |
| 15 15B | JBC2CIJ210 | 30  | 9   | 3     | 6     | 1     |
| 16 16B | JBC2CIJ212 | 52  | 20  | 6     | 0     | 4     |
| 17 17B | JBC2CIJ216 | 51  | 13  | 4     | 0     | 2     |

|        |            |    |   |    |    |   |
|--------|------------|----|---|----|----|---|
| 19 19D | JBC2CIK093 | 47 | 2 | 4  | 6  | 4 |
| 20 20D | JBC2CIK095 | 66 | 6 | 4  | 7  | 3 |
| 21 21D | JBC2CIK100 | 46 | 6 | 4  | 4  | 2 |
| 22 22D | JBC2CIK117 | 50 | 4 | 3  | 10 | 3 |
| 24 24C | JBC2CIK182 | 56 | 3 | 1  | 2  | 1 |
| 25 25C | JBC2CIK184 | 45 | 2 | 3  | 9  | 2 |
| 27 27A | JBC2CIL266 | 6  | 2 | 8  | 6  | 3 |
| 28 28A | JBC2CIL272 | 11 | 2 | 7  | 11 | 6 |
| 29 29A | JBC3CIL138 | 9  | 1 | 10 | 6  | 9 |
| 31 31A | JBC3CIL149 | 1  | 0 | 1  | 0  | 0 |

| P  | K  | Lv  | Ls | Lm | Bio-Clast | Matrix | Other | Total |     |
|----|----|-----|----|----|-----------|--------|-------|-------|-----|
|    | 0  | 0   | 0  | 0  | 2         | 0      | 12    | 9     | 300 |
|    | 2  | 14  | 0  | 12 | 26        | 0      | 21    | 15    | 300 |
|    | 0  | 24  | 0  | 0  | 11        | 0      | 6     | 25    | 300 |
|    | 0  | 6   | 0  | 10 | 1         | 0      | 16    | 20    | 300 |
|    | 0  | 15  | 0  | 0  | 1         | 0      | 0     | 35    | 300 |
|    | 6  | 19  | 0  | 0  | 34        | 0      | 26    | 14    | 300 |
|    | 8  | 45  | 0  | 0  | 36        | 2      | 29    | 7     | 300 |
|    | 2  | 35  | 0  | 0  | 22        | 0      | 25    | 9     | 300 |
| 51 | 44 | 0   | 2  | 6  | 0         | 10     | 10    | 300   |     |
| 2  | 22 | 0   | 3  | 16 | 0         | 11     | 43    | 300   |     |
| 0  | 8  | 0   | 0  | 29 | 0         | 1      | 36    | 300   |     |
| 3  | 2  | 0   | 40 | 1  | 2         | 95     | 10    | 300   |     |
| 0  | 0  | 0   | 0  | 5  | 0         | 45     | 5     | 300   |     |
| 0  | 2  | 1   | 1  | 9  | 0         | 71     | 10    | 300   |     |
| 0  | 25 | 0   | 3  | 3  | 0         | 28     | 49    | 300   |     |
| 1  | 14 | 0   | 0  | 4  | 0         | 0      | 27    | 300   |     |
| 1  | 26 | 0   | 2  | 7  | 0         | 23     | 55    | 300   |     |
| 5  | 5  | 0   | 0  | 5  | 0         | 55     | 20    | 300   |     |
| 5  | 2  | 0   | 0  | 4  | 0         | 37     | 64    | 300   |     |
| 1  | 26 | 0   | 5  | 2  | 0         | 57     | 27    | 300   |     |
| 87 | 3  | 91  | 11 | 3  | 0         | 28     | 4     | 300   |     |
| 67 | 17 | 43  | 21 | 0  | 0         | 38     | 2     | 300   |     |
| 83 | 12 | 50  | 14 | 0  | 0         | 37     | 0     | 300   |     |
| 73 | 0  | 212 | 0  | 0  | 7         | 0      | 2     | 300   |     |

| P  | K  | Lv | Ls | Lm | Bio-Clast | Matrix | Other | Total |     |
|----|----|----|----|----|-----------|--------|-------|-------|-----|
|    | 0  | 0  | 0  | 0  | 1         | 0      | 4     | 3     | 100 |
|    | 1  | 5  | 0  | 4  | 9         | 0      | 7     | 5     | 100 |
|    | 0  | 8  | 0  | 0  | 4         | 0      | 2     | 8     | 100 |
|    | 0  | 2  | 0  | 3  | 0         | 0      | 5     | 7     | 100 |
|    | 0  | 5  | 0  | 0  | 0         | 0      | 0     | 12    | 100 |
|    | 2  | 6  | 0  | 0  | 11        | 0      | 9     | 5     | 100 |
|    | 3  | 15 | 0  | 0  | 12        | 1      | 10    | 2     | 100 |
|    | 1  | 12 | 0  | 0  | 7         | 0      | 8     | 3     | 100 |
| 17 | 15 | 0  | 1  | 2  | 0         | 0      | 3     | 3     | 100 |
|    | 1  | 7  | 0  | 1  | 5         | 0      | 4     | 14    | 100 |
|    | 0  | 3  | 0  | 0  | 10        | 0      | 0     | 12    | 100 |
|    | 1  | 1  | 0  | 13 | 0         | 1      | 32    | 3     | 100 |
|    | 0  | 0  | 0  | 0  | 2         | 0      | 15    | 2     | 100 |
|    | 0  | 1  | 0  | 0  | 3         | 0      | 24    | 3     | 100 |

|    |   |    |   |   |   |    |    |     |
|----|---|----|---|---|---|----|----|-----|
| 0  | 8 | 0  | 1 | 1 | 0 | 9  | 16 | 100 |
| 0  | 5 | 0  | 0 | 1 | 0 | 0  | 9  | 100 |
| 0  | 9 | 0  | 1 | 2 | 0 | 8  | 18 | 100 |
| 2  | 2 | 0  | 0 | 2 | 0 | 18 | 7  | 100 |
| 2  | 1 | 0  | 0 | 1 | 0 | 12 | 21 | 100 |
| 0  | 9 | 0  | 2 | 1 | 0 | 19 | 9  | 100 |
| 29 | 1 | 30 | 4 | 1 | 0 | 9  | 1  | 100 |
| 22 | 6 | 14 | 7 | 0 | 0 | 13 | 1  | 100 |
| 28 | 4 | 17 | 5 | 0 | 0 | 12 | 0  | 100 |
| 24 | 0 | 71 | 0 | 0 | 2 | 0  | 1  | 100 |

Table 13

Detrital components counted in this study and their abbreviations

| Number | Abreviator | Component                                              |
|--------|------------|--------------------------------------------------------|
| 1      | QMU        | Monocrystalline quartz (undulosity >5)                 |
| 2      | QMS        | Monocrystalline quartz (non-undulose [undulosity <5°]) |
| 3      | QP <5      | Polycrystalline quartz (crystal units per grain <5)    |
| 4      | QP >5      | Polycrystalline quartz (crystal units per grain >5)    |
| 5      | Chert      | Chert                                                  |
| 7      | K          | Potassium feldspar                                     |
| 8      | Lv         | Lithic (volcanic) fragments                            |
| 9      | Ls         | Lithic (sedimentary) fragments                         |
| 10     | Lm         | Lithic (metamorphic) fragments                         |
| 11     | Bioclasts  | Bioclasts                                              |
| 12     | Matrix     | Matrix                                                 |
